# Supplementary material for: Revisiting metazoan phylogeny with genomic sampling of all phyla
Source: PubMed Central journal article supplement (PMC6650721; doi:10.1098/rspb.2019.0831), 2019-07-10
Supplement: rspb20190831supp1.pdf [file rspb20190831supp1.pdf]

## Supplemental materials and methods

### *Sample collection, preservation, and RNA extraction*

Specimens were preserved during field collections in *RNAlater* (Ambion) according to the manufacturer's recommendations, flash frozen at -80 C, or directly placed into 0.5 mL TRIzol for RNA extraction, and total RNA was extracted with established protocols, homogenizing LN2-frozen samples directly within 0.5-1.0 mL TRIzol (Riesgo et al., 2012b, 2012a). Tissues with RNA yields expected to be within the sensitivity range of fragment analysis were routinely QC'd by Agilent Bioanalyzer 2100, using RNA 6000 Pico or Nano kits (Agilent, Inc, cat. #s 5067-1511 and 5067-1513). Polyadenylated mRNA was enriched using the Dynabeads™ mRNA Purification Kit (ThermoFisher, Inc., cat. # 61006), eluting in up to 10  $\mu$ L of 10 mM Tris-HCl, pH 7.5.

### *Transcriptome library generation*

Except where specified, mRNA was converted into fragmented cDNA libraries and indexed for Illumina sequencing using an automated library construction robot, the Apollo 324 (originally manufactured by IntegenX Inc., then Wafergen, Inc., and currently by TaKaRa Bio, Inc). We used the PrepX RNA-seq kit (TaKaRa, cat. # 640096), which RNase III-fragments mRNA and performs single-stranded adapter ligation prior to reverse transcription, to prepare up to 8 libraries at once, and used manufacturer-provided indexing primers to assign sample barcodes. Libraries were QC'd using the KAPA Library Quantification kit (KAPA Biosciences, Inc. KK4824, now Roche cat. # 07960140001), and the Agilent 2100 High Sensitivity DNA kit (Agilent, Inc. cat. # 5067-4626). Pools were prepared with plexity 6-12, and sequenced as paired-end 150 bp or 250 bp reads on Illumina HiSeq 2500 instruments, typically as rapid runs.

### *Whole genome and transcriptome amplified samples*

For the gnathostomulid *Tenuignathia rikerae*, we attempted a genome assembly from DNA amplified from a single individual by multiple displacement amplification. In brief, a single *RNAlater* preserved specimen was rinsed in distilled water, and kept in a lens of  $\sim$ 2  $\mu$ L, to which alkaline lysis buffer from the Qiagen REPLI-g Single-Cell Kit (Qiagen, Inc., cat. # 150343) was directly added, and DNA amplified as per manufacturer's recommendations with the single-cell protocol, incubating at 30 C for 8 hours. MDA product was QC'd and confirmed to be HMW (70 kbp+) on an Agilent Genomic DNA TapeStation 2200 kit (Agilent, Inc. cat. # 5067-5365). One aliquot was taken and fragmented to  $\sim$ 350 bp using a Covaris S220 focused ultrasonicator and prepared as an Illumina short-insert genomic DNA library using a previously described protocol for end-repair/A-tailing and ligation of Y-shaped adapters (Neiman et al., 2012), followed by limited library amplification with indexing primers and KAPA HiFi polymerase (KK2103). 1  $\mu$ g of MDA product was processed into a mate-pair library using the Illumina Nextera Mate-Pair Library Preparation Kit (Illumina, Inc. cat. # FC-132-1001), following the manufacturer's gel-free protocol, and amplifying the final Illumina library with indexing oligos and the KAPA HiFi polymerase. Adapter sequences were trimmed from the mate-pair library using NextClip (Leggett et al., 2014) using default parameters, and from the short-insert library using Trimmomatic as described above. An initial assembly using SPAdes v3.2.0 was created running in single-cell mode; however, the assembly failed to finish at the k-mer size step of 55. We therefore took the error-corrected reads output by SPAdes, and used these as inputs for

assembly with IDBA\_UD v1.1.1 (Peng et al., 2012). The resulting assembly remained highly fragmented (1,691,903 scaffolds of which 1,140,751 were <200 bp, with a 496.07 Mbp span, a scaffold N50 of 360 bp, and GC% of 32.25). Nonetheless, we conducted an ab initio gene prediction effort on the resultant assembly, using Augustus v3.2.2, and though still highly incomplete (e.g. with only 37.29% and 61.39% of complete and complete+partial BUSCO v3 eukaryotic core genes, respectively), these peptides were still judged to be a sufficiently large sample to be useful in the context of phylogenetic inference.

For a number of samples (marked by a \* in Supplemental Table S1), we chose to utilize an alternative approach to transcriptome library preparation, undertaking blunt-end circularization of double-stranded cDNA and phi29-mediated rolling-circle amplification, the so-called PMA method (Pan et al., 2013), reverse-transcribing, forming second-strand cDNA, and circularizing following the published description, but leveraging the Qiagen REPLI-g Single-Cell kits protocol for amplifying purified DNA. These amplified cDNAs were then fragmented to ~350 bp inserts via Covaris S220 sonication, and prepared into short-insert Illumina libraries as described above.

### *Transcriptome assembly and peptide prediction*

Demultiplexed FASTQ files were trimmed of adapters and low-quality sequences using Trimmomatic v0.32 (Bolger et al., 2014) and assembled in Trinity (Haas et al., 2013). Explicit efforts to control cross-contamination from index swapping were not made during the period of dataset curation; however, we point out that transcriptome libraries prepared in this laboratory have shown exceptionally low levels of cross contamination in secondary analysis (Ballenghien et al., 2017; Simion et al., 2018). Putative coding sequences were predicted using TransDecoder, and the longest ORFs per Trinity subcomponents were extracted as described elsewhere (Laumer et al., 2015), serving as proxies for the most complete isoform per unigene.

### *Orthologue assignment*

Representative proteomes from derived from Trinity transcriptome assemblies or annotated genome assemblies from 202 species representing all animal phyla and unikont outgroups were brought together (Supplemental Table S1) for an all-by-all blastp task, driven by a series of highly parallel job arrays on the EBI high-performance compute cluster and the Harvard Odyssey 2.0 research computing cluster. Results were formatted as tsv files described in the documentation for use of precomputed blast results, and the OrthoFinder v0.4 algorithm (Emms and Kelly, 2015) was used to group peptide sequences into 1,648,840 top-level gene families (most very small in sequence occupancy), calling with the '--only-groups' flag to stop the algorithm prior to orthogroup alignment and gene tree construction, which was conducted manually.

From these top-level orthogroups, a highly reduced set of 7,437 groups were selected, which each had at least 10 separate phyla (or higher outgroup clades, as specified by the first four letters of each taxon abbreviation in Supplemental Table S1). The PASTA algorithm (Mirarab et al., 2015) run with default parameters was used to iteratively produce gene trees (calling the FastTree2 algorithm) and gapped multiple sequence alignments. From the successfully completed alignments, we ran the ZORRO algorithm to mask all columns with confidence score  $\leq 0.1$ , and removed all sequences from each orthogroup which were composed of more than 50% gaps, with the intention to select against highly incompletely assembled transcripts. From the remaining orthogroup set, we selected 5,645

groups which contained more than 50 sequences and 50 columns. At this stage, we reconstituted the orthogroups using the original, untrimmed sequences, and used the L-INS-I algorithm of the MAFFT aligner (Katoh and Standley, 2013) to produce new multiple sequence alignment. These were again masked with ZORRO, this time retaining all columns with a confidence score of > 0.5, and from these masked alignments produced gene trees with RAxML, called with the PROTCATLGF model and producing support values with 50 rapid bootstrap replicates. These gene trees and their originating alignments were further curated with python scripts from the Phylogenomic Dataset Construction (PDC) pipeline (Yang and Smith, 2014), calling the following three scripts in succession within the working directory as such:

```
'python trim_tips.py . .tre 5 10' (removing all tree tips that were >5x longer than their sister, as well as all tips that were over branch length 10)
```

```
'python mask_tips_by_taxonID_transcripts.py . . y' (masking all sequences from the same species that formed a monophyletic or paraphyletic group, retaining the one with the longest proportion of aligned residues)
```

```
'python cut_long_internal_branches.py . tt.mm 2 30 cut_2'. (cutting all gene families into smaller groups of size at least 30 if an edge within the gene tree had branch length of 2 or longer)
```

From this process survived 5,578 gene trees. These were then parsed to extract unambiguously orthologous groups, using the criterion implemented in the Unrooted Phylogenetic Orthology (UPhO) algorithm (Ballesteros and Hormiga, 2016), yielding 5,511 final orthogroups comprising 195 taxa.

### *Matrix construction*

To construct the pan-metazoa matrix, we selected a set of 422 alignments from the initial set of 1,034 that were seen to have at least 100 sequences, by calling the MARE algorithm, initially concatenating the 1,034 with phyutility's '-concat' option (Smith and Dunn, 2008), converting the resulting NEXUS file into a FASTA in BioPython and extracting the partition list with vi regular expressions, and running MARE v0.12 with the options '-t 100' '-d 0.5' to force retention of all taxa and select for a matrix judged to be of adequate (initially at least 100,000 residues) size. Inspection of this matrix and initial trees, and a contemporaneous publication reporting increased compositional artifacts from including outgroups more distant than Choanoflagellata (Pisani et al., 2015), led us to remove 28 taxa judged to be redundant representatives of their lineage and/or too sparsely represented in the matrix, plus all non-choanoflagellate outgroups. The initial 422-gene matrix of 106,186 residues was split into 10 nearly equally sized parts using BioPython, as a rough parallelization of this job which ran very slowly as a serial process on the intact matrix, and BMGE v1.12 was run with options '-g 0', '-h 0.5', '-m BLOSUM30', and '-s FAST' to retain all gapped sites, but trim those that failed its approximate non-stationarity test, and those judged to be entropic relative to the BLOSUM30 matrix (Criscuolo and Gribaldo, 2010). These parts were then re-joined using BioPython to retain the final matrix. As reported in the main text, this process was performed both before and after the deletion of the 28 taxa, with different results on the proportion of sites retained.

For our subclade-specific matrices, we considered from among the set of 5,511 UPhO groups a smaller set of 3,824 groups with at least 50 sequences, and created initial sets using the arbitrary taxon inclusion criteria specified within the main text. MARE was used as described above to further

reduce these sets to matrix sizes deemed appropriate for CAT+GTR analysis (approximately 50-100k sites), tuning the '-d' parameter to effect this result, and the resultant matrix was then treated with BMGE prior to phylogenetic analysis, again as called above.

### *Phylogenetic analyses*

In general, CAT+GTR+ $\Gamma$ 4 analyses were conducted using the PhyloBayes-MPI v1.6j release (Lartillot et al., 2013), starting each chain without specifying an initial tree, specifying the model with '-cat' '-gtr', removing constant sites with the '-dc' option, and running each generally with 10 to 20 MPI processes. Dayhoff-6 recoded analyses were conducted with the same default parameters, but in Phylobayes v4.1c serial (Lartillot et al., 2009), specifying '-dayhoff6' to initiate recoding. To trim suspected rogue taxa, we first used the RogueNaRok algorithm (Aberer et al., 2013) with default parameters to inspect .treelist files, and removed the species thus identified using the '-prune' option of phyutility, prior to a new summary.

IQ-tree (Nguyen et al., 2015) was run using specified versions, typically as a multithreaded process using '-nt 10' or AUTO, and selecting '-bb 1000' and '-bnni' to run 1,000 UFboot2 replicates corrected with nearest-neighbor interchanges. Models were specified with the '-m' parameter as described in figure captions; in general, whenever the PMSF model was applied (Wang et al., 2018), it was used to approximate the C60+LG+FO+R4 profile mixture model, and was called using an initial guide tree inferred with '-m LG4X+FO+R4'.

### **References**

- Aberer, A.J., Krompass, D., Stamatakis, A., 2013. Pruning Rogue Taxa Improves Phylogenetic Accuracy: An Efficient Algorithm and Webservice. *Syst. Biol.* 62, 162–166.  
<https://doi.org/10.1093/sysbio/sys078>
- Ballenghien, M., Faivre, N., Galtier, N., 2017. Patterns of cross-contamination in a multispecies population genomic project: detection, quantification, impact, and solutions. *BMC Biol.* 15, 25. <https://doi.org/10.1186/s12915-017-0366-6>
- Ballesteros, J.A., Hormiga, G., 2016. A new orthology assessment method for phylogenomic data: Unrooted Phylogenetic Orthology. *Mol. Biol. Evol.* 33, 2117–2134.  
<https://doi.org/10.1093/molbev/msw069>
- Bolger, A.M., Lohse, M., Usadel, B., 2014. Trimmomatic: a flexible trimmer for Illumina sequence data. *Bioinformatics* 30, 2114–2120. <https://doi.org/10.1093/bioinformatics/btu170>
- Criscuolo, A., Gribaldo, S., 2010. BMGE (Block Mapping and Gathering with Entropy): a new software for selection of phylogenetic informative regions from multiple sequence alignments. *BMC Evol. Biol.* 10, 210. <https://doi.org/10.1186/1471-2148-10-210>
- Emms, D.M., Kelly, S., 2015. OrthoFinder: solving fundamental biases in whole genome comparisons dramatically improves orthogroup inference accuracy. *Genome Biol.* 16, 157.  
<https://doi.org/10.1186/s13059-015-0721-2>
- Haas, B.J., Papanicolaou, A., Yassour, M., Grabherr, M., Blood, P.D., Bowden, J., Couger, M.B., Eccles, D., Li, B., Lieber, M., MacManes, M.D., Ott, M., Orvis, J., Pochet, N., Strozzi, F., Weeks, N., Westerman, R., William, T., Dewey, C.N., Henschel, R., LeDuc, R.D., Friedman, N., Regev, A., 2013. *De novo* transcript sequence reconstruction from RNA-seq using the Trinity platform for reference generation and analysis. *Nat. Protoc.* 8, 1494–1512.  
<https://doi.org/10.1038/nprot.2013.084>

- Katoh, K., Standley, D.M., 2013. MAFFT Multiple Sequence Alignment Software Version 7: Improvements in Performance and Usability. *Mol. Biol. Evol.* 30, 772. <https://doi.org/10.1093/molbev/mst010>
- Lartillot, N., Lepage, T., Blanquart, S., 2009. PhyloBayes 3: a Bayesian software package for phylogenetic reconstruction and molecular dating. *Bioinformatics* 25, 2286–2288. <https://doi.org/10.1093/bioinformatics/btp368>
- Lartillot, N., Rodrigue, N., Stubbs, D., Richer, J., 2013. PhyloBayes MPI: phylogenetic reconstruction with infinite mixtures of profiles in a parallel environment. *Syst. Biol.* 62, 611–615. <https://doi.org/10.1093/sysbio/syt022>
- Laumer, C.E., Hejnol, A., Giribet, G., 2015. Nuclear genomic signals of the ‘microturbellarian’ roots of platyhelminth evolutionary innovation. *eLife* 4, e05503. <https://doi.org/10.7554/eLife.05503>
- Leggett, R.M., Clavijo, B.J., Clissold, L., Clark, M.D., Caccamo, M., 2014. NextClip: an analysis and read preparation tool for Nextera Long Mate Pair libraries. *Bioinformatics* 30, 566–568. <https://doi.org/10.1093/bioinformatics/btt702>
- Mirarab, S., Nguyen, N., Guo, S., Wang, L.-S., Kim, J., Warnow, T., 2015. PASTA: Ultra-Large Multiple Sequence Alignment for Nucleotide and Amino-Acid Sequences. *J. Comput. Biol.* 22, 377–386. <https://doi.org/10.1089/cmb.2014.0156>
- Neiman, M., Sundling, S., Grönberg, H., Hall, P., Czene, K., Lindberg, J., Klevebring, D., 2012. Library Preparation and Multiplex Capture for Massive Parallel Sequencing Applications Made Efficient and Easy. *PLOS ONE* 7, e48616. <https://doi.org/10.1371/journal.pone.0048616>
- Nguyen, L.-T., Schmidt, H.A., von Haeseler, A., Minh, B.Q., 2015. IQ-TREE: A Fast and Effective Stochastic Algorithm for Estimating Maximum-Likelihood Phylogenies. *Mol. Biol. Evol.* 32, 268–274. <https://doi.org/10.1093/molbev/msu300>
- Pan, X., Durrett, R.E., Zhu, H., Tanaka, Y., Li, Y., Zi, X., Marjani, S.L., Euskirchen, G., Ma, C., LaMotte, R.H., Park, I.-H., Snyder, M.P., Mason, C.E., Weissman, S.M., 2013. Two methods for full-length RNA sequencing for low quantities of cells and single cells. *Proc. Natl. Acad. Sci. U. S. A.* 110, 594–599. <https://doi.org/10.1073/pnas.1217322109>
- Peng, Y., Leung, H.C.M., Yiu, S.M., Chin, F.Y.L., 2012. IDBA-UD: a de novo assembler for single-cell and metagenomic sequencing data with highly uneven depth. *Bioinforma. Oxf. Engl.* 28, 1420–1428. <https://doi.org/10.1093/bioinformatics/bts174>
- Pisani, D., Pett, W., Dohrmann, M., Feuda, R., Rota-Stabelli, O., Philippe, H., Lartillot, N., Wörheide, G., 2015. Genomic data do not support comb jellies as the sister group to all other animals. *Proc. Natl. Acad. Sci.* 112, 15402–15407. <https://doi.org/10.1073/pnas.1518127112>
- Riesgo, A., Andrade, S.C.S., Sharma, P.P., Novo, M., Pérez-Porro, A.R., Vahtera, V., González, V.L., Kawauchi, G.Y., Giribet, G., 2012a. Comparative description of ten transcriptomes of newly sequenced invertebrates and efficiency estimation of genomic sampling in non-model taxa. *Front. Zool.* 9, 33. <https://doi.org/10.1186/1742-9994-9-33>
- Riesgo, A., Pérez-Porro, A.R., Carmona, S., Leys, S.P., Giribet, G., 2012b. Optimization of preservation and storage time of sponge tissues to obtain quality mRNA for next-generation sequencing. *Mol. Ecol. Resour.* 12, 312–322. <https://doi.org/10.1111/j.1755-0998.2011.03097.x>
- Simion, P., Belkhir, K., François, C., Veyssier, J., Rink, J.C., Manuel, M., Philippe, H., Telford, M.J., 2018. A software tool “CroCo” detects pervasive cross-species contamination in next generation sequencing data. *BMC Biol.* 16, 28. <https://doi.org/10.1186/s12915-018-0486-7>
- Smith, S.A., Dunn, C.W., 2008. Phyutility: a phyloinformatics tool for trees, alignments and molecular data. *Bioinformatics* 24, 715–716. <https://doi.org/10.1093/bioinformatics/btm619>
- Wang, H.-C., Minh, B.Q., Susko, E., Roger, A.J., 2018. Modeling Site Heterogeneity with Posterior Mean Site Frequency Profiles Accelerates Accurate Phylogenomic Estimation. *Syst. Biol.* 67, 216–235. <https://doi.org/10.1093/sysbio/syx068>
- Yang, Y., Smith, S.A., 2014. Orthology inference in nonmodel organisms using transcriptomes and low-coverage genomes: improving accuracy and matrix occupancy for phylogenomics. *Mol. Biol. Evol.* 31, 3081–3092. <https://doi.org/10.1093/molbev/msu245>

## Supplementary Figure and Table Captions

**Figure S1 – Maximum Likelihood cladogram from concatenated analysis of all 3,824 trimmed orthologue alignments with greater than 50 species (201 taxa, 1,263,500 sites), inferred in IQ-tree v 1.6.3 under the LG4X+R4+FO model, with 1,000 UFboot2 replicates corrected with NNI.**

**Figure S2 – Maximum Likelihood cladogram from the pan-Metazoa matrix with no taxon or site trimming (195 taxa, 106,186 sites), inferred in IQ-tree v1.6.2 under the PMSF approximation of the C60+LG+FO+R4 model, with 1,000 UFboot2 replicates corrected with NNI. In this and all other PMSF-profile derived trees, an initial guide tree was inferred under the LG4X mixture model.**

**Figure S3 – Cladogram from posterior consensus summary of CAT+GTR+ $\Gamma$ 4 analysis of post-BMGE taxon-pruned, 43,011 site pan-Metazoa matrix, with rogue taxa masked prior to summary. Two chains were used to form this consensus, sampling every 10 generations, discarding the first 2,000 as burn-in, yielding a maxdiff of 0.309244.**

**Figure S4 – Cladogram from posterior consensus summary of CAT+GTR+ $\Gamma$ 4 analysis of post-BMGE taxon-pruned, 43,011 site pan-Metazoa matrix, with no rogue taxon masking prior to summary. Two chains were used to form this consensus, sampling every 10 generations, discarding the first 2,000 as burn-in, yielding a maxdiff of 0.309244.**

**Figure S5 – Cladogram from Maximum Likelihood analysis of the post-BMGE taxon-pruned, 43,011 site pan-Metazoa matrix, inferred in IQ-tree v1.6.2 under the PMSF approximation of the C60+LG+FO+R4 model, with 1000 UFboot2 replicates corrected with NNI.**

**Figure S6 – Cladogram from posterior consensus summary of CAT+GTR+ $\Gamma$ 4 analysis of pan-Metazoa matrix M, but with no rogue taxon masking prior to summary. Three chains were used to form this consensus, sampling every 10 generations and discarding the first 14,000 as burn-in, yielding a maxdiff of 0.21288.**

**Figure S7 - Cladogram from posterior consensus summary of CAT+GTR+ $\Gamma$ 4 analysis of pan-Metazoa matrix M, with rogue taxon masking prior to summary, and full pp and taxon labels. Three chains were used to form this consensus, sampling every 10 generations and discarding the first 14,000 as burn-in, yielding a maxdiff of 0.21288.**

**Figure S8 – Cladogram from posterior consensus summary of CAT+GTR+ $\Gamma$ 4 analysis of pan-Metazoa matrix M, recoded into in Dayhoff-6 groups, the same as presented in Figure 2b, but with no rogue taxon masking prior to summary. Three chains were used to form this consensus, sampling every 10 generations and discarding the first 2,100 as burn-in, yielding a maxdiff of 0.543937.**

**Figure S9 – Cladogram from posterior consensus summary of CAT+GTR+ $\Gamma$ 4 analysis of pan-Metazoa matrix M, recoded into in Dayhoff-6 groups, the same as presented in Figure 2b, with rogue taxon masking prior to summary. Three chains were used to**

form this consensus, sampling every 10 generations and discarding the first 2,100 as burn-in, yielding a maxdiff of 0.228175.

**Figure S10 -- Maximum Likelihood cladogram derived from pan-Metazoa matrix M, inferred in IQ-tree v1.6.2 under the PMSF approximation of the C60+LG+FO+R4 model, with 1000 UFboot2 replicates corrected with NNI.**

**Figure S11 -- Cladogram from posterior consensus summary of CAT+GTR+ $\Gamma$ 4 analysis of "Spiralia" matrix S, the same as presented in Figure 3, but with no rogue taxon masking prior to summary. Two chains were used to form this consensus, sampling every 10 generations and discarding the first 6,000 as burn-in, yielding a maxdiff of 0.146158.**

**Figure S12 -- Cladogram from posterior consensus summary of CAT+GTR+ $\Gamma$ 4 analysis of "Spiralia" matrix S, the same as presented in Figure 3, with rogue taxon masking prior to summary, and full pp and taxon labels. Two chains were used to form this consensus, sampling every 10 generations and discarding the first 6,000 as burn-in, yielding a maxdiff of 0.140087.**

**Figure S13 -- Cladogram from posterior consensus summary of CAT+GTR+ $\Gamma$ 4 analysis of "Spiralia" matrix S, recoded into Dayhoff-6 groups, with rogue taxon masking prior to summary. Two chains were used to form this consensus, sampling every 10 generations and discarding the first 2,000 as burn-in, yielding a maxdiff of 0.0884638.**



**Figure S14 -- Maximum Likelihood cladogram derived from “Spiralia” matrix S, inferred in IQ-tree v1.6.2 under the PMSF approximation of the C60+LG+FO+R4 model, with 1000 UFboot2 replicates corrected with NNI. The position of the root is arbitrarily drawn between the clade of Syndermata+Micrognathozoa+Chaetognatha and the remaining taxa.**

**Figure S15 -- Cladogram from posterior consensus summary of CAT+GTR+ $\Gamma$ 4 analysis of “Ecdysozoa” matrix E, the same as presented in Figure 4, but with no rogue taxon masking prior to summary. Two chains were used to form this consensus, sampling every 10 generations and discarding the first 2,000 as burn-in, yielding a maxdiff of 0.552004.**

**Figure S16 -- Cladogram from posterior consensus summary of CAT+GTR+ $\Gamma$ 4 analysis of “Ecdysozoa” matrix E, the same as presented in Figure 4, with rogue taxon masking prior to summary, and full pp and taxon labels. Two chains were used to form this consensus, sampling every 10 generations and discarding the first 2,000 as burn-in, yielding a maxdiff of 0.0839663.**

**Figure S17 -- Cladogram from posterior consensus summary of CAT+GTR+ $\Gamma$ 4 analysis of “Ecdysozoa” matrix E, recoded into Dayhoff-6 groups, with rogue taxon masking prior to summary. Two chains were used to form this consensus, sampling every 10 generations and discarding the first 2,000 as burn-in, yielding a maxdiff of 0.0884638.**

**Figure S18 -- Maximum Likelihood cladogram derived from “Ecdysozoa” matrix E, inferred in IQ-tree v1.6.2 under the PMSF approximation of the C60+LG+FO+R4 model, with 1000 UFboot2 replicates corrected with NNI.**

**Figure S19 -- Cladogram from posterior consensus summary of CAT+GTR+ $\Gamma$ 4 amino acid analysis of “Non-Bilateria” matrix N, the same as presented in Figure 5A. Two chains were used to form this consensus, sampling every 10 generations and discarding the first 5,000 as burn-in, yielding a maxdiff of 0.078028.**

**Figure S20 -- Cladogram from posterior consensus summary of CAT+GTR+ $\Gamma$ 4 Dayhoff-6 recoded analysis of “Non-Bilateria” matrix N, the same as presented in Figure 5B. Two chains were used to form this consensus, sampling every 10 generations and discarding the first 5,000 as burn-in, yielding a maxdiff of 0.239156.**

**Figure S21 -- Cladogram from posterior consensus summary of CAT+GTR+ $\Gamma$ 4 amino acid analysis of “Non-Bilateria” matrix N', the same as presented in Figure 5C. Two chains were used to form this consensus, sampling every 10 generations and discarding the first 5,000 as burn-in, yielding a maxdiff of 0.0944149.**

**Figure S22 -- Cladogram from posterior consensus summary of CAT+GTR+ $\Gamma$ 4 Dayhoff-6 recoded analysis of “Non-Bilateria” matrix N', the same as presented in Figure 5D. Two chains were used to form this consensus, sampling every 10 generations and discarding the first 2,000 as burn-in, yielding a maxdiff of 0.06295.**

**Figure S23 – Cladogram from ML analysis of “Non-Bilateria” matrix N, inferred in IQ-tree v1.6.2 under the PMSF approximation of the C60+LG+FO+R4 model, with 1000 UFboot2 replicates corrected with NNI.**

**Figure S24 – Cladogram from ML analysis of “Non-Bilateria” matrix N’, inferred in IQ-tree v1.6.2 under the PMSF approximation of the C60+LG+FO+R4 model, with 1000 UFboot2 replicates corrected with NNI.**

**Table S1 – Mapping between full species name, abbreviated names used in Figures S1-S24, assembly type, and SRA/Bioproject numbers/genome repository for raw data source. Taxa annotated with \* represent rogue taxa masked in Matrix M, those annotated with † were deleted during the construction of Matrix M, and those annotated with ‡ were taxa included in the orthology analysis, but which were not included among the alignments with minimum 100 spp.**

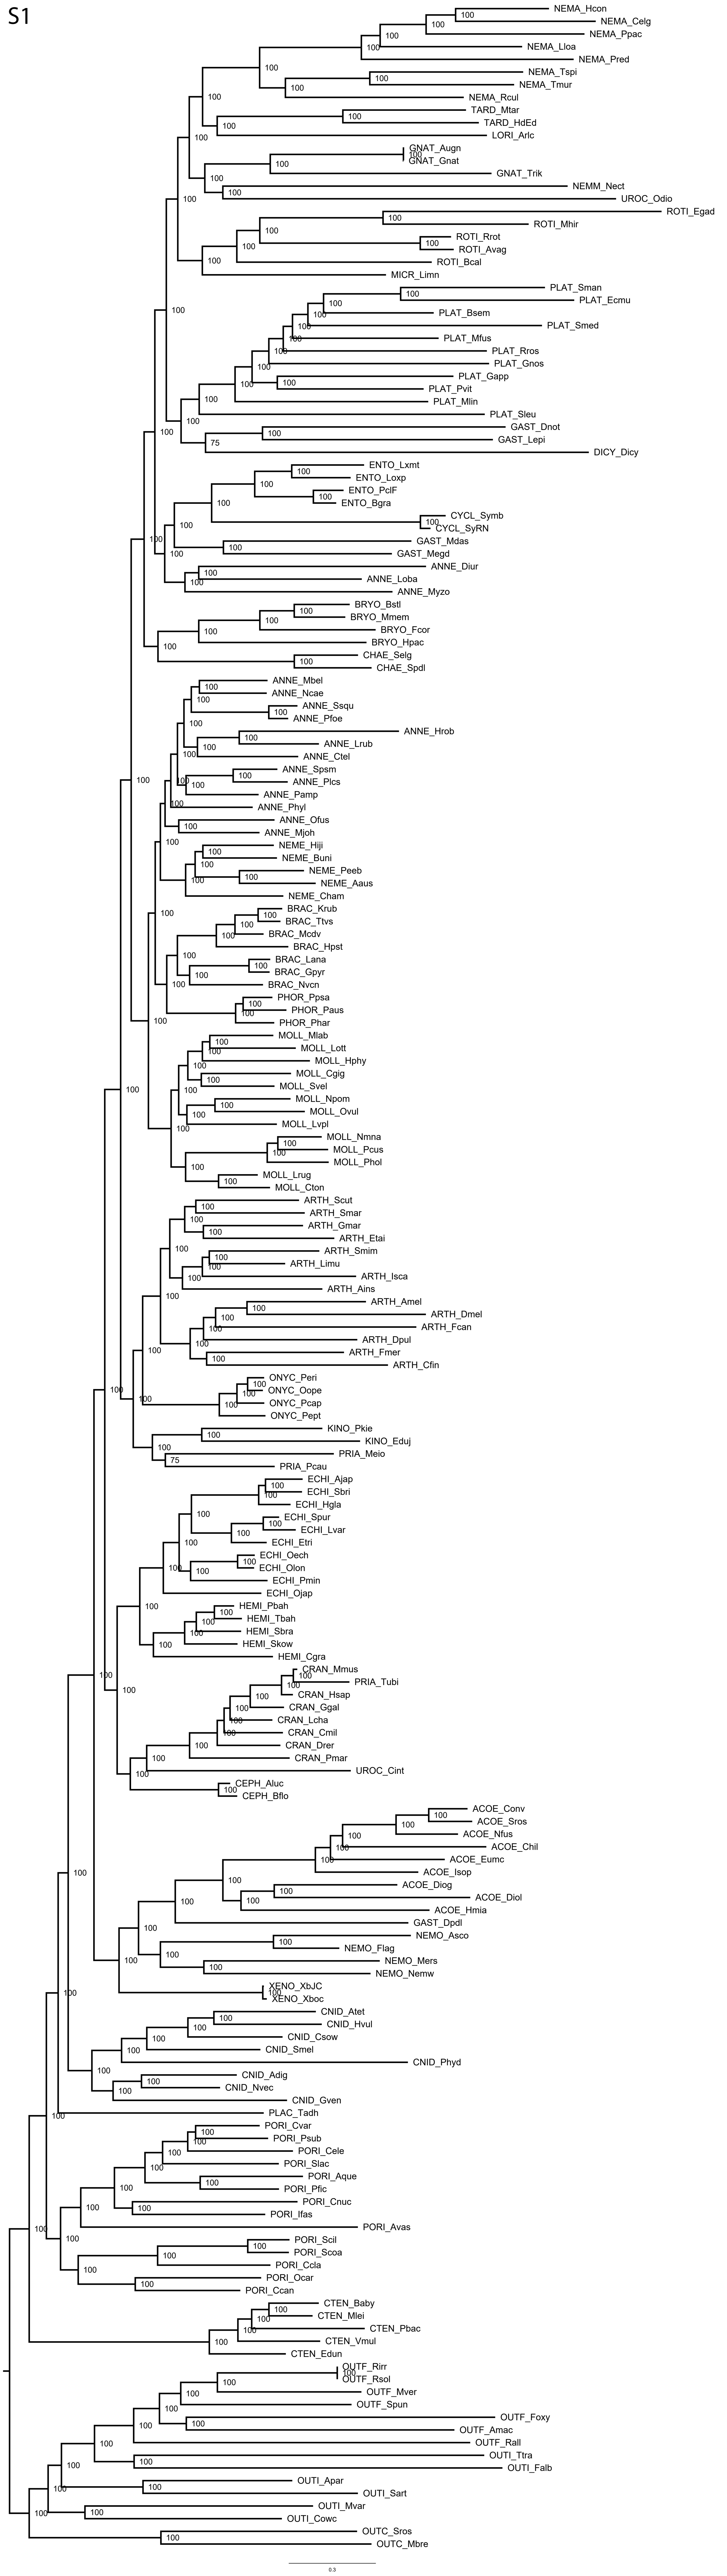

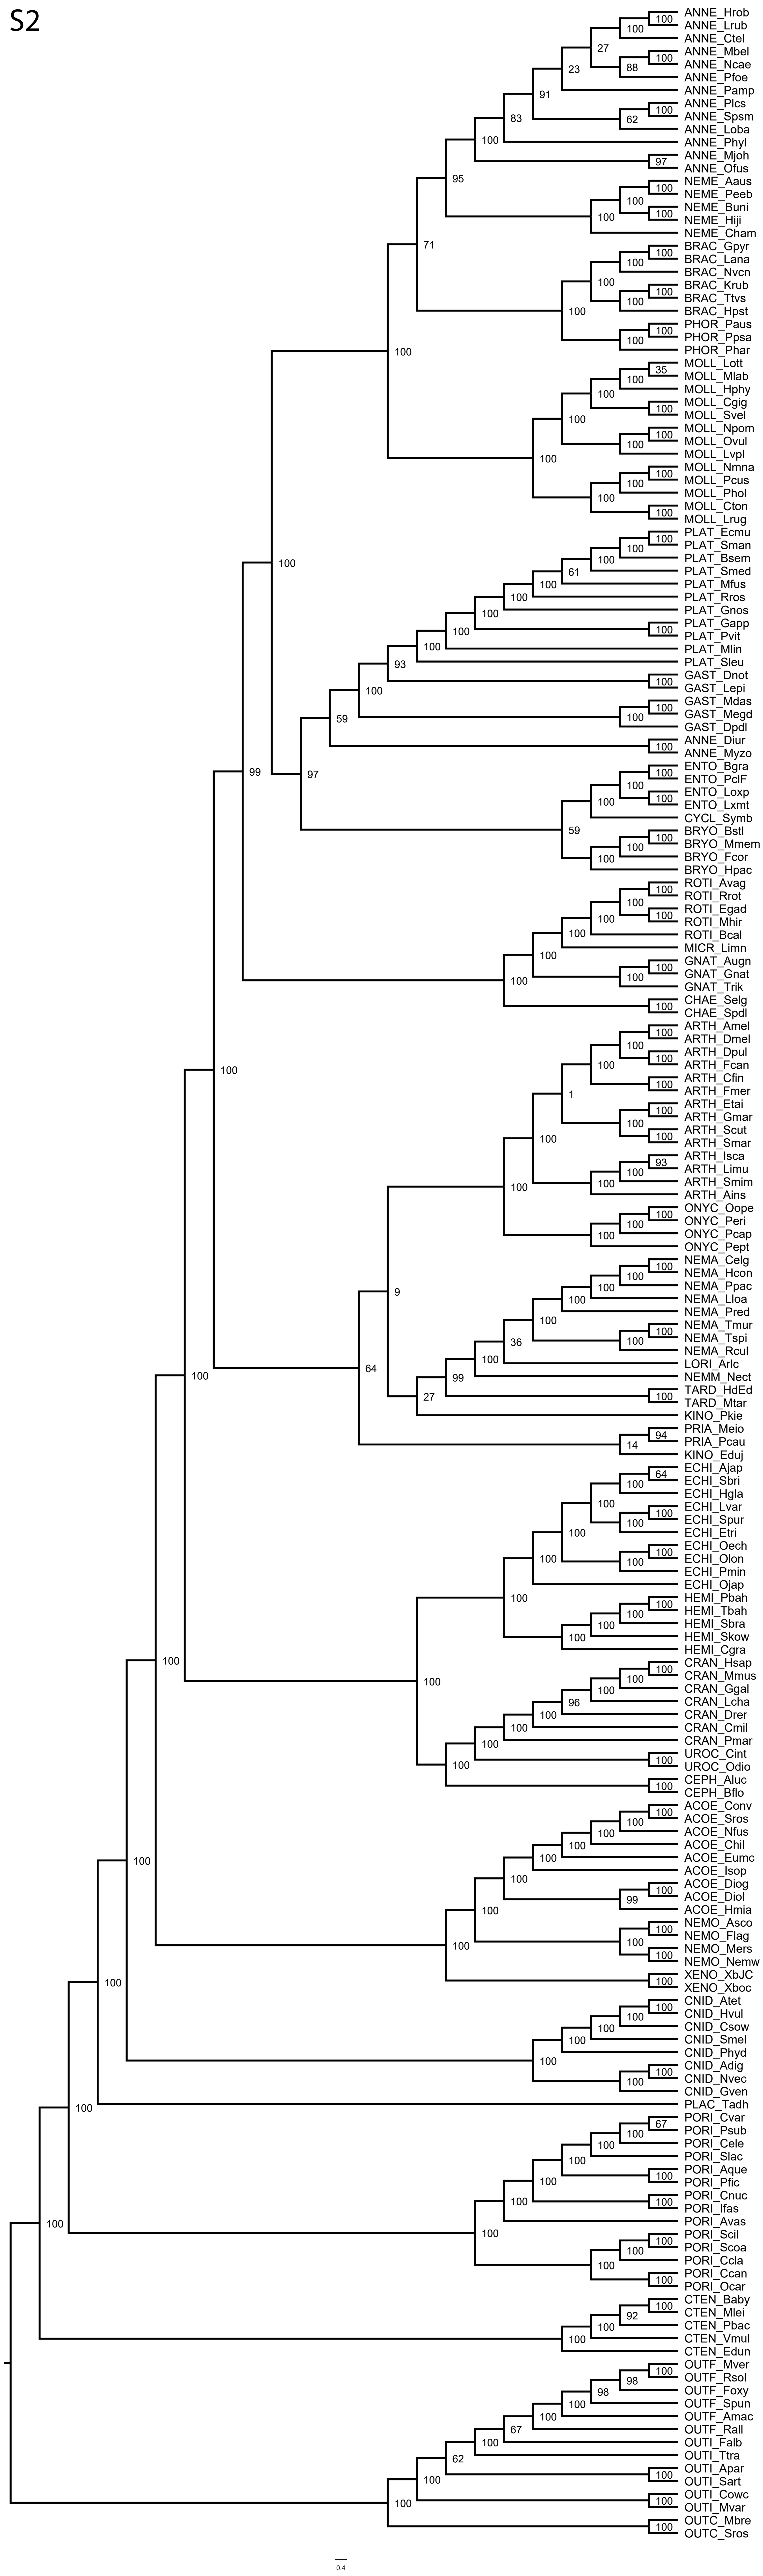

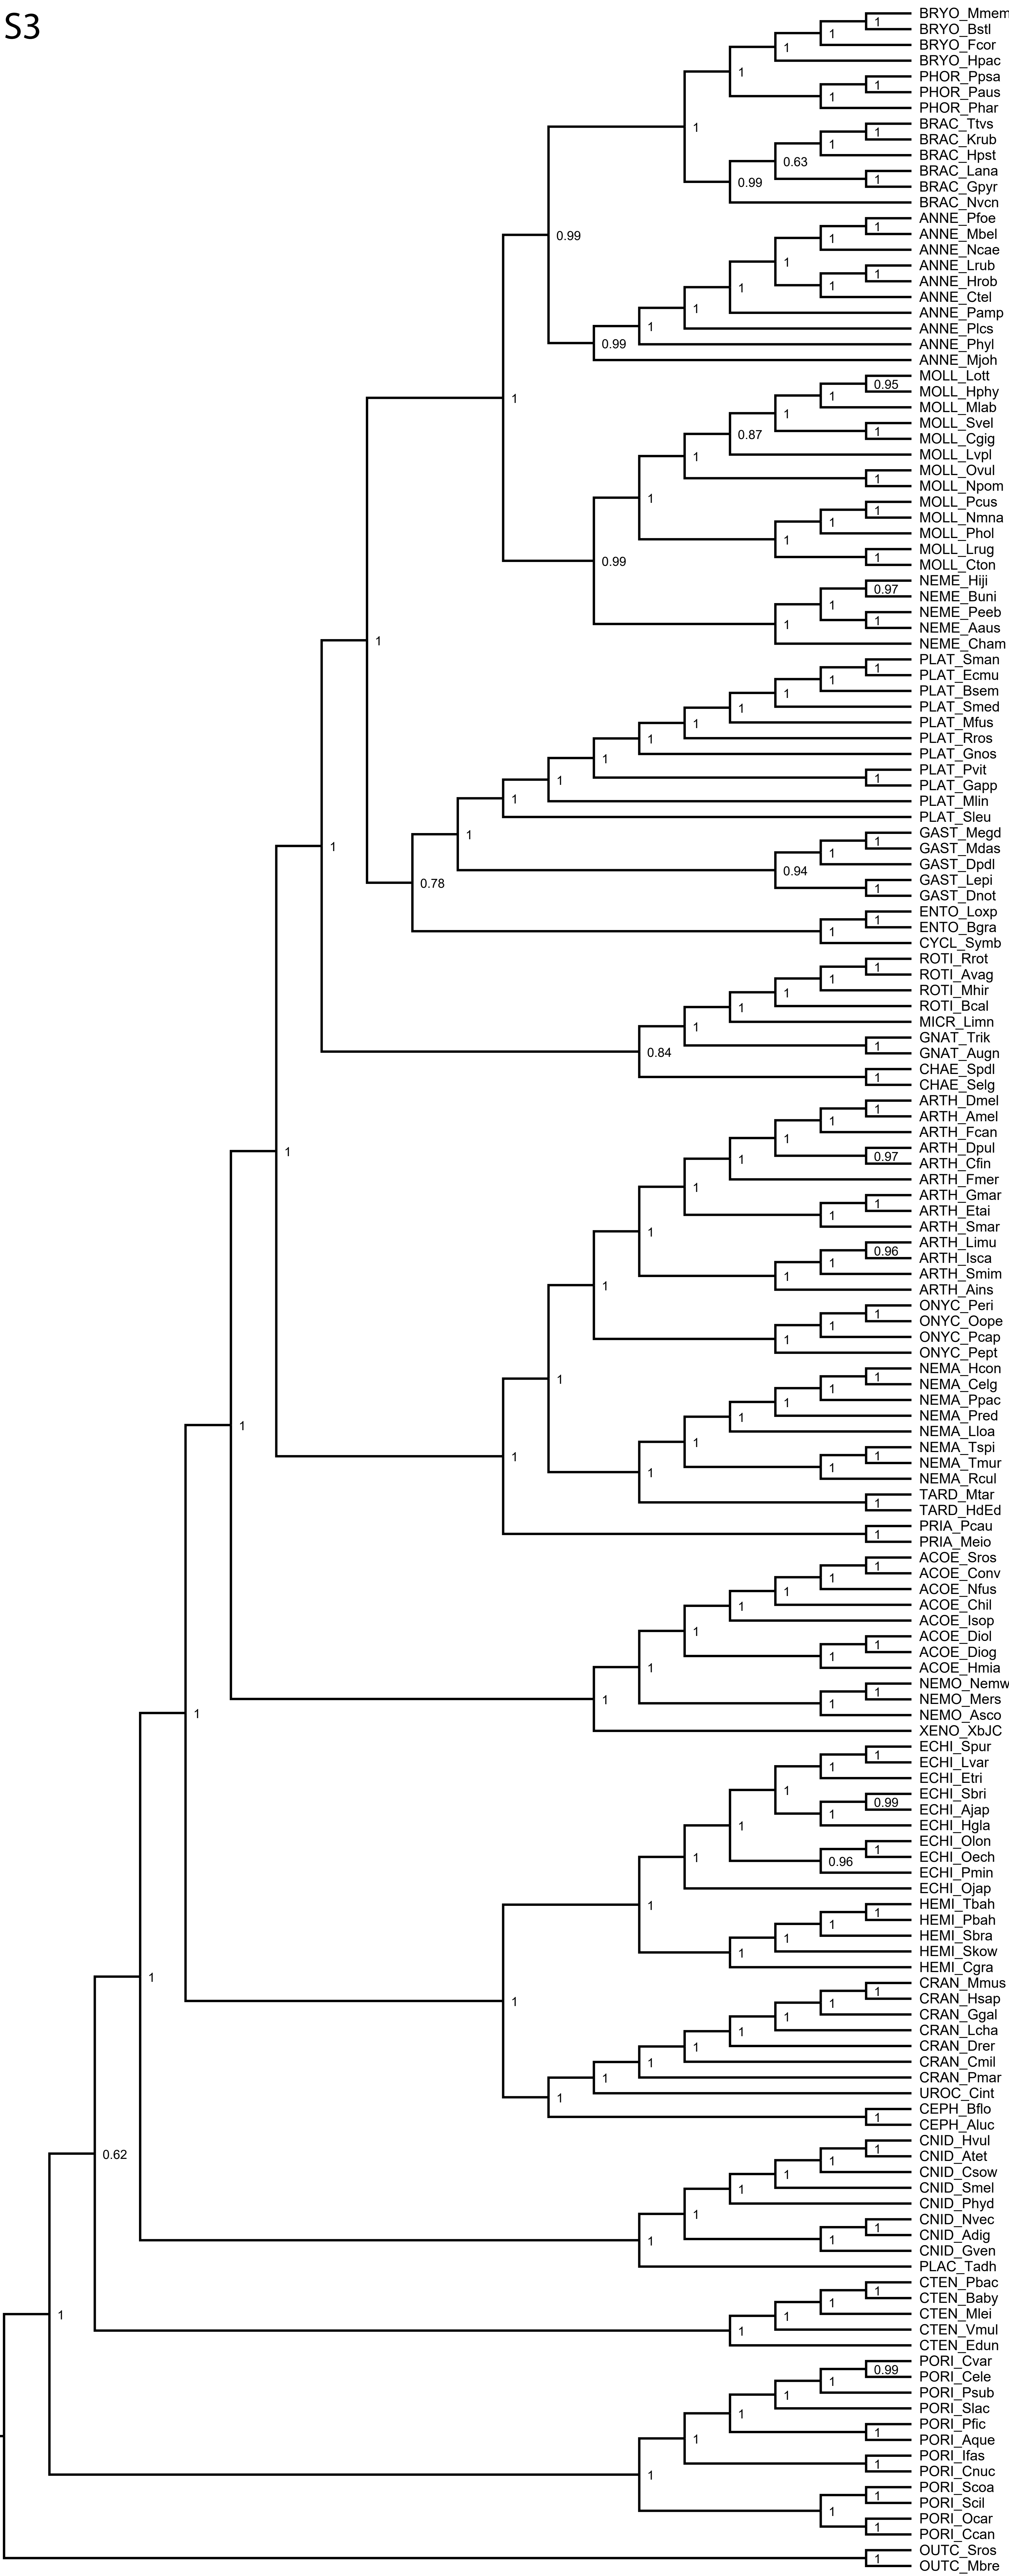

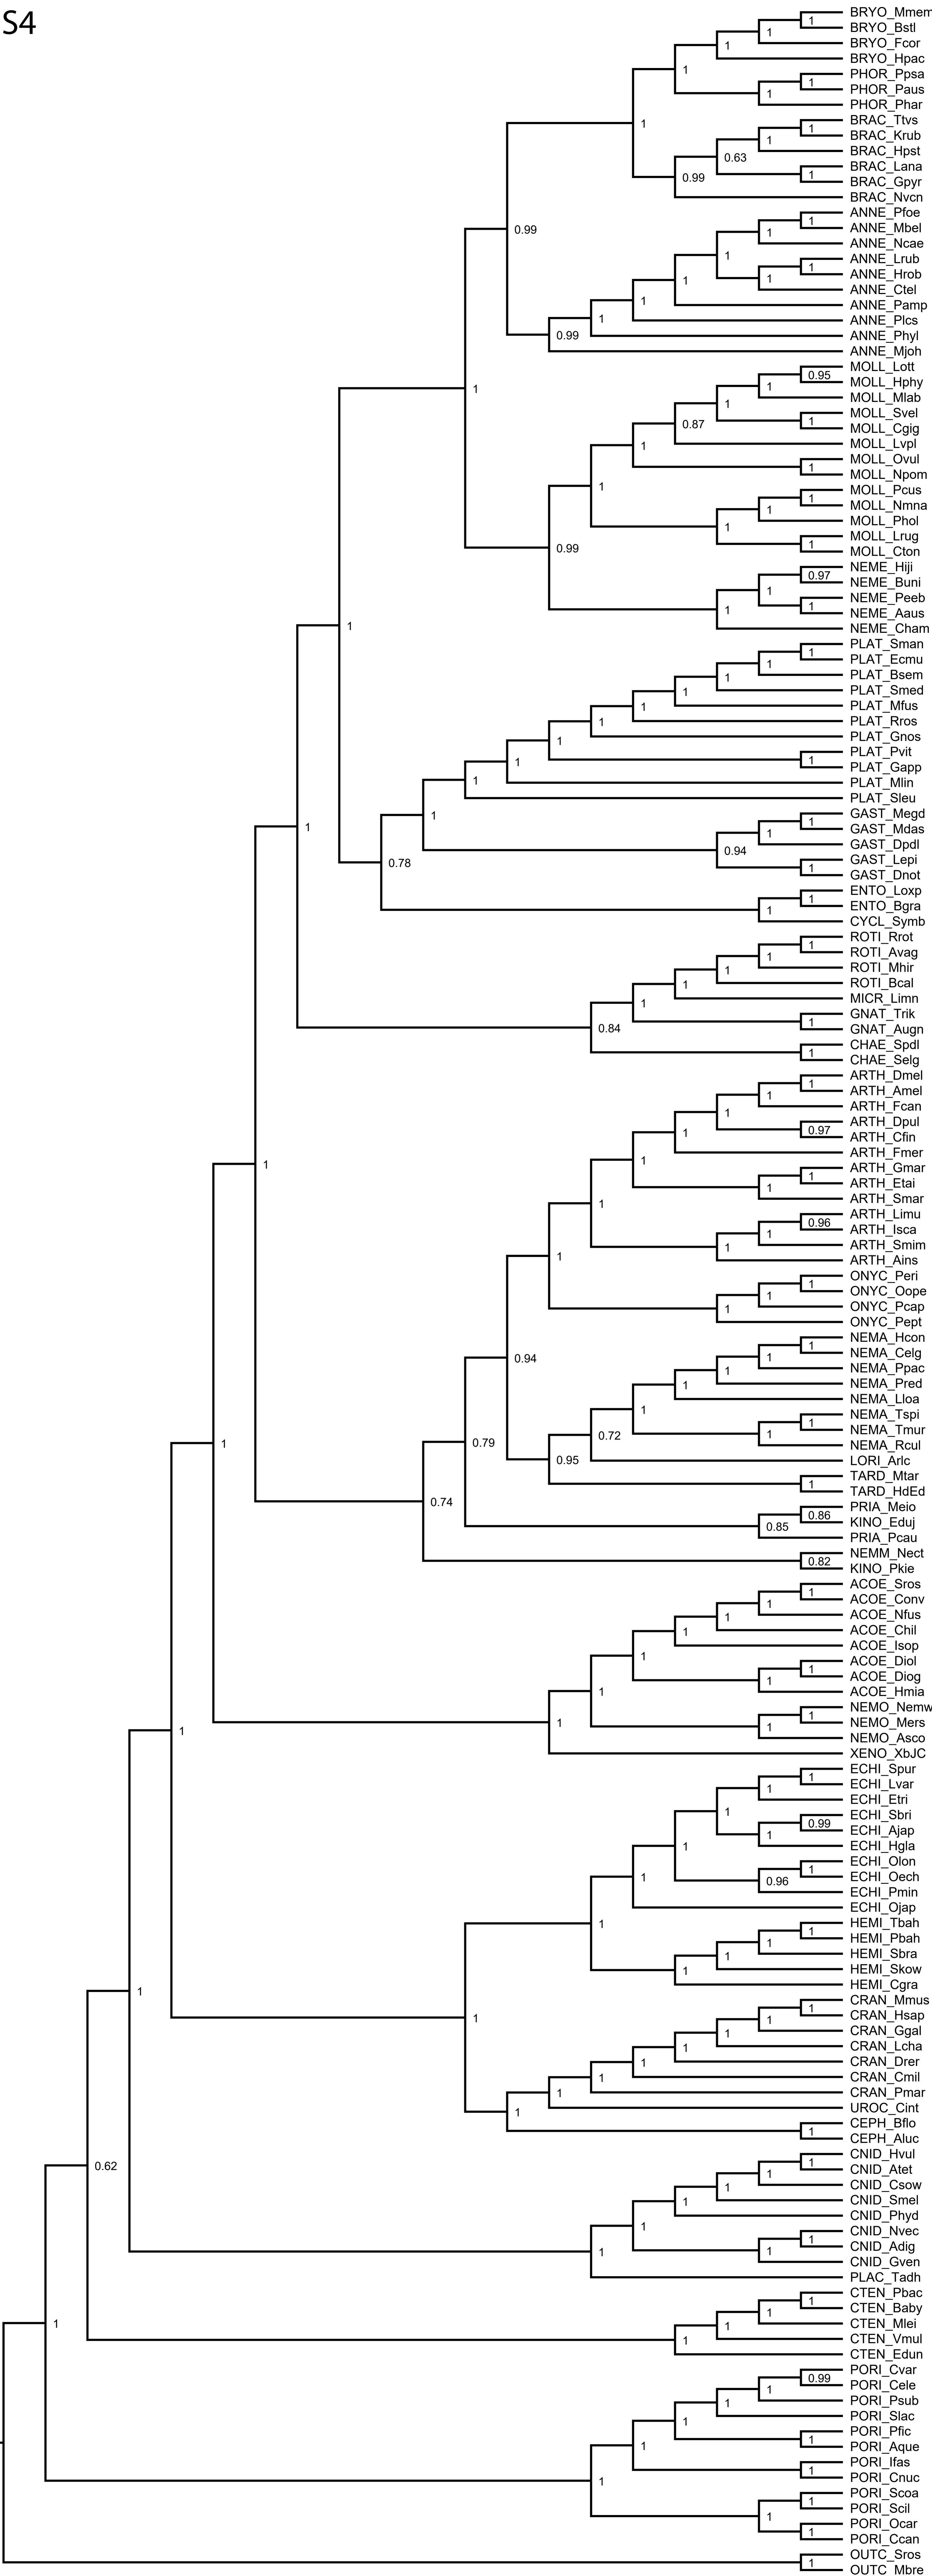

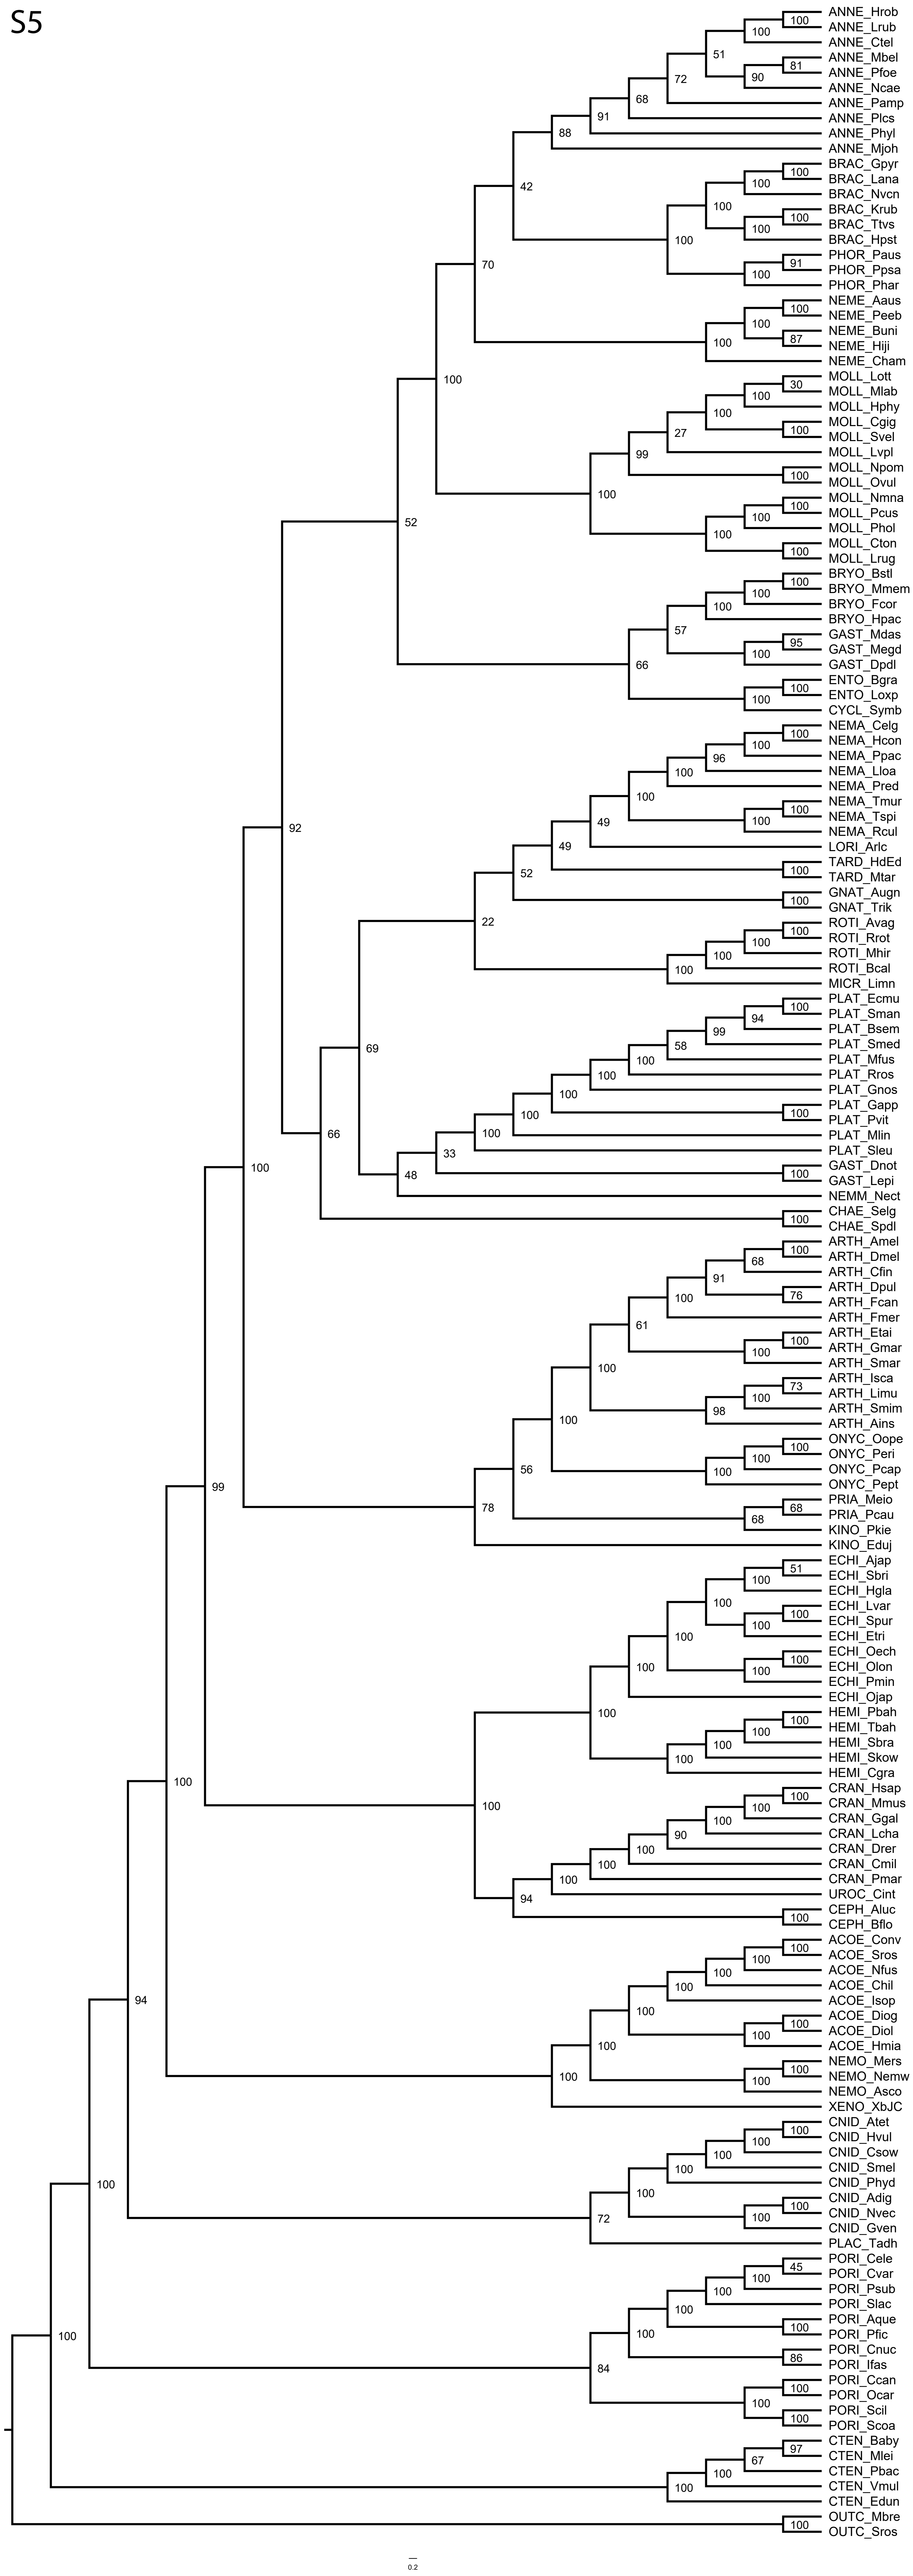





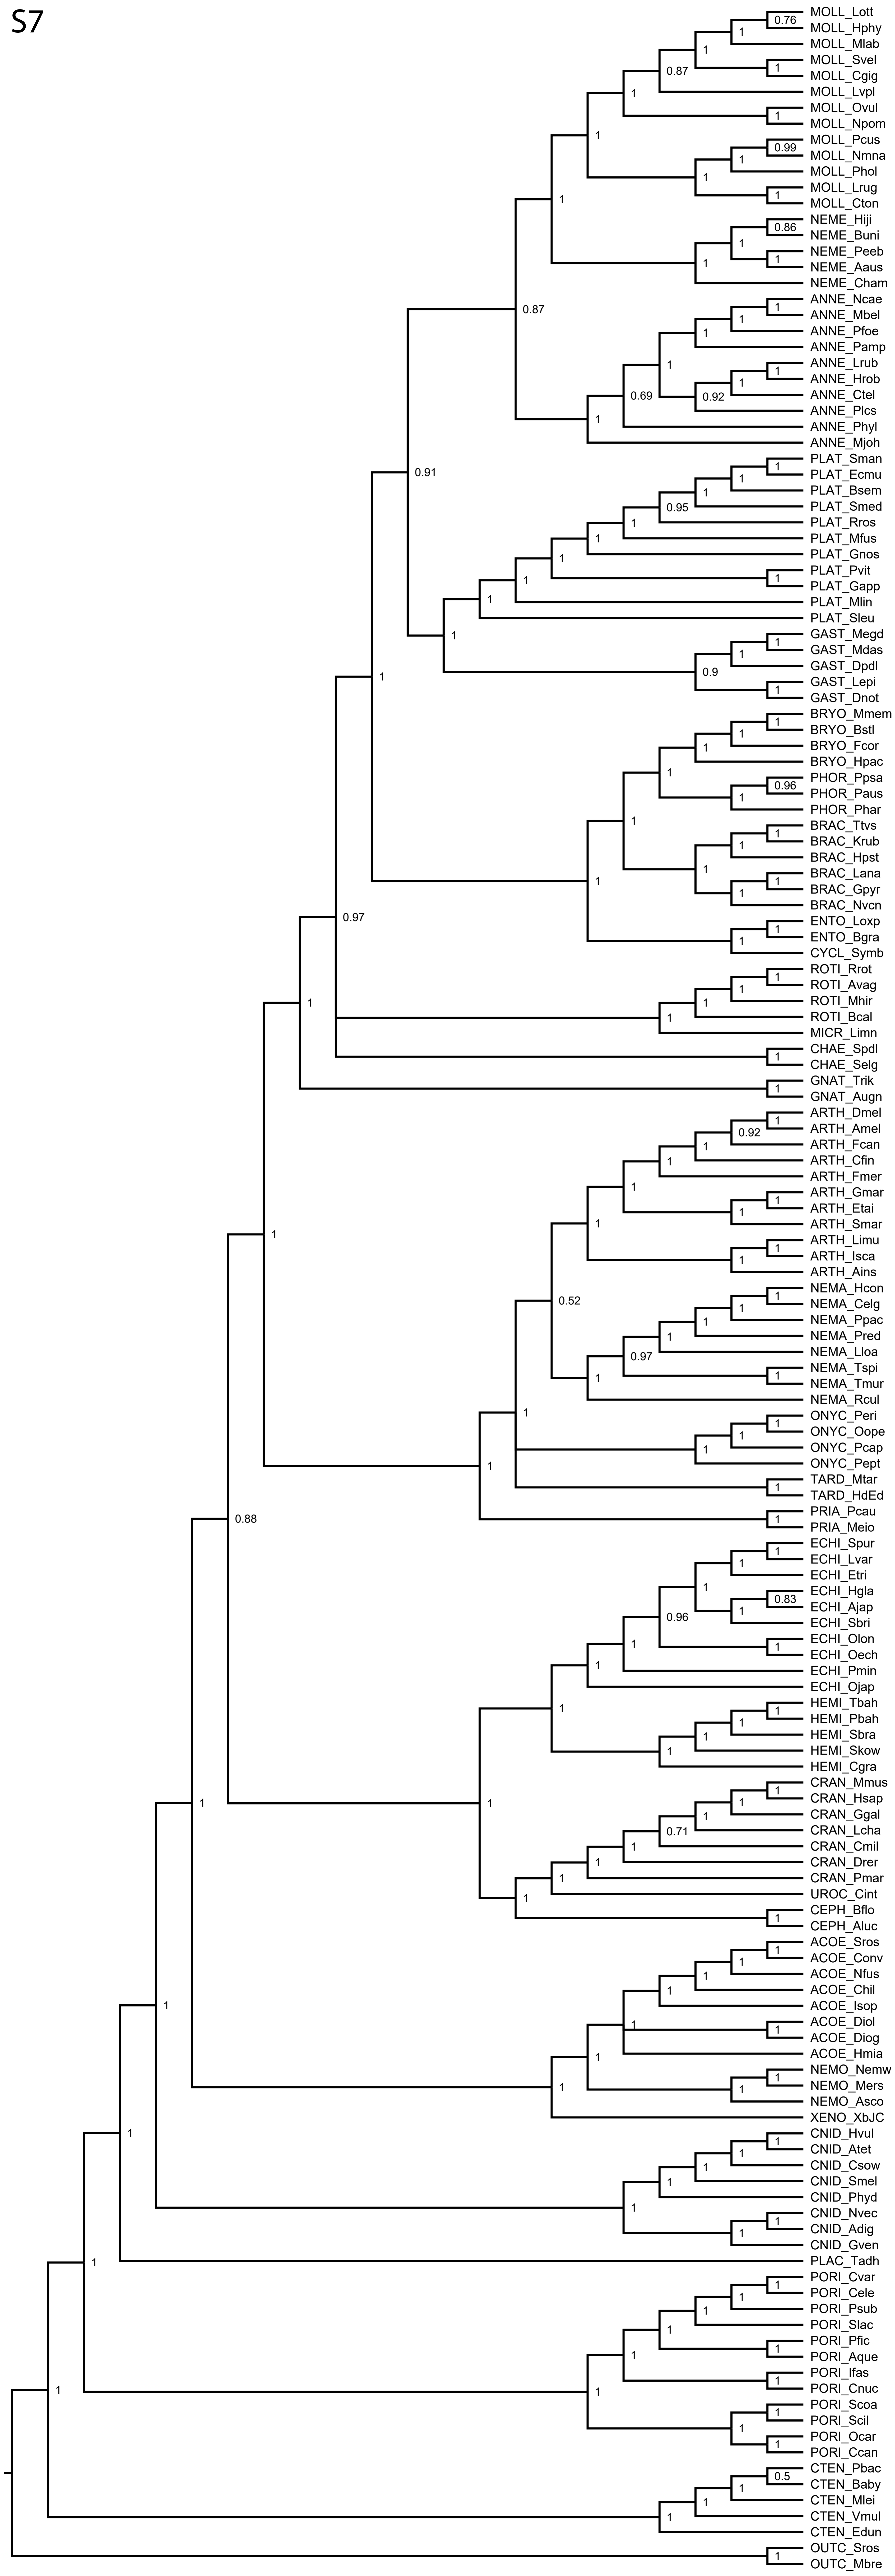

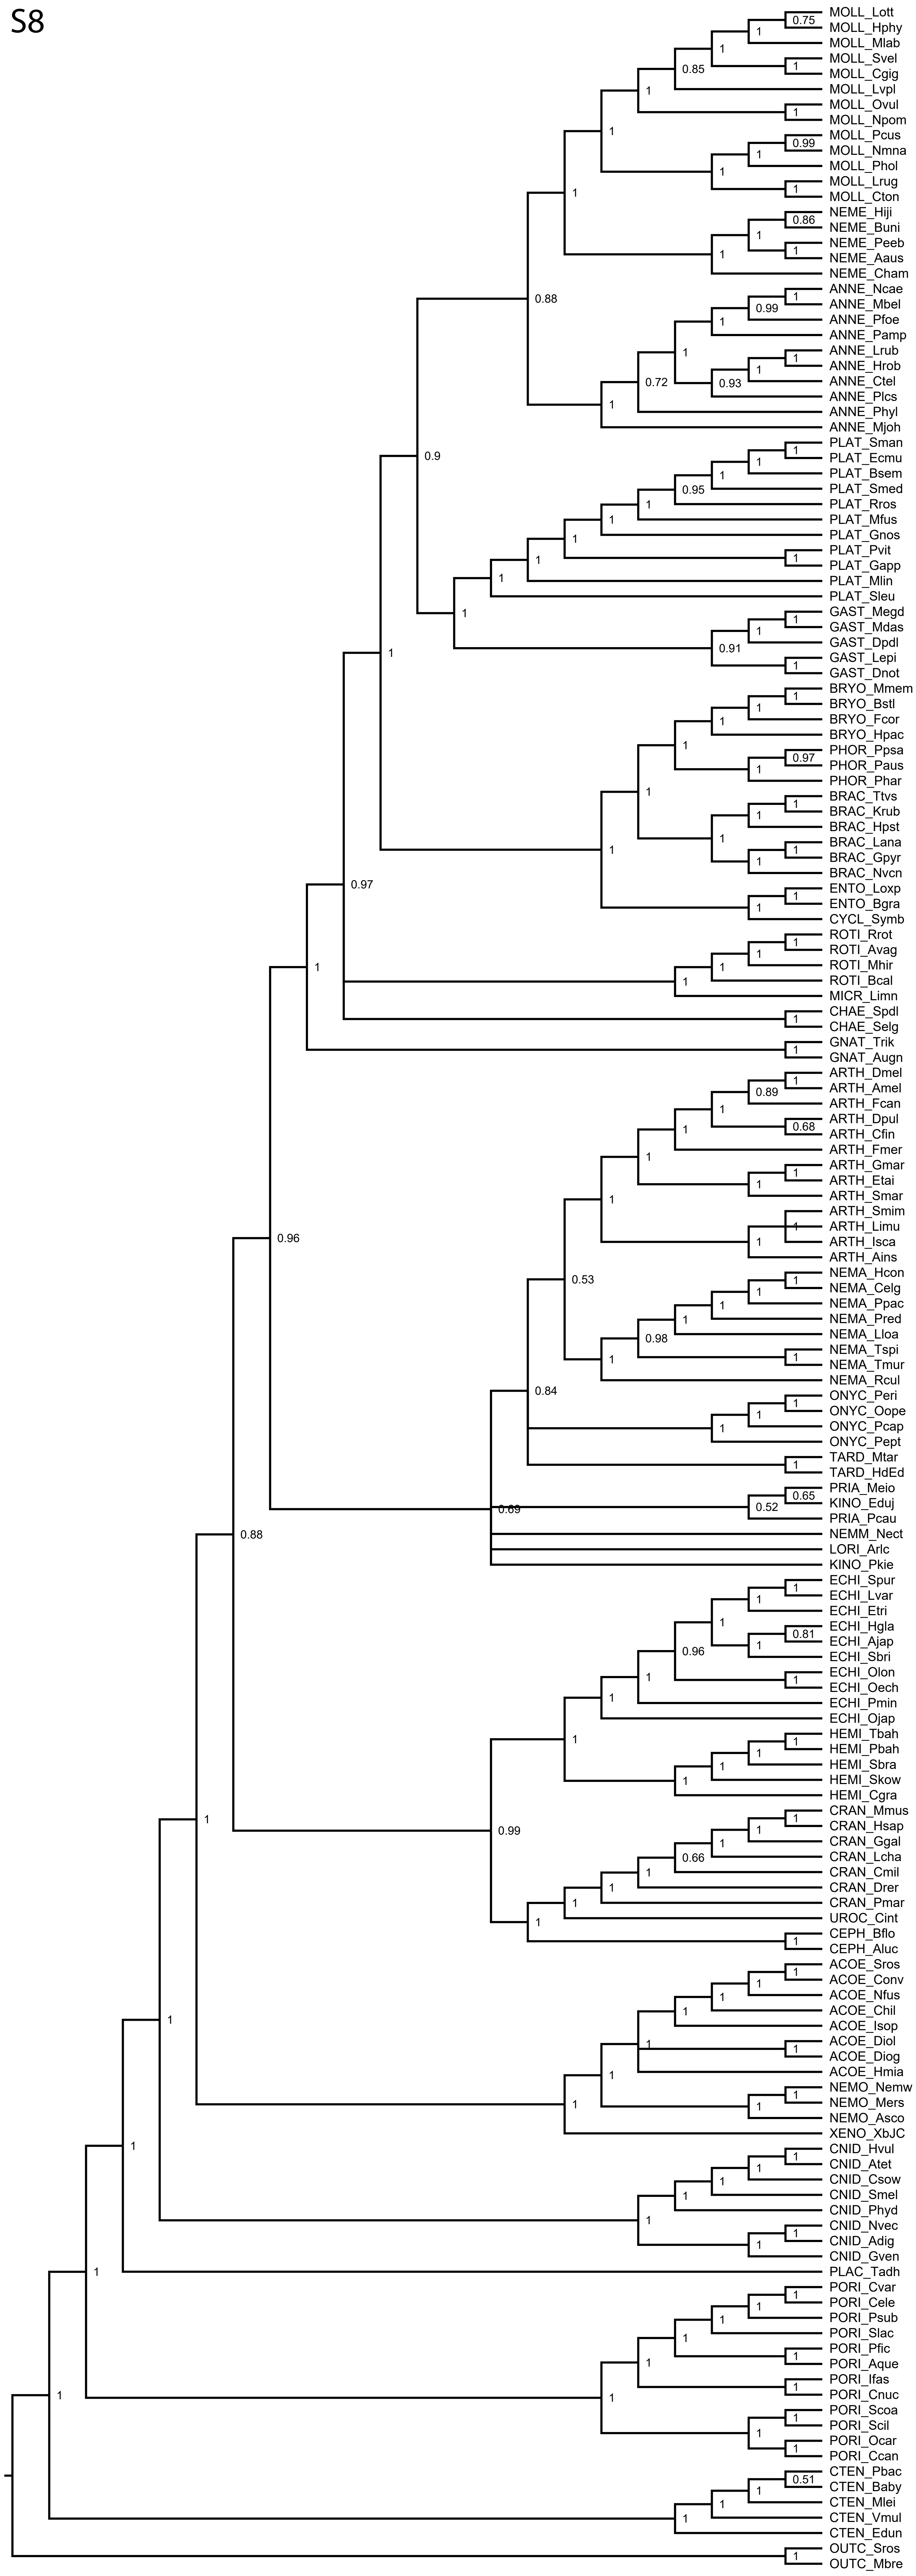

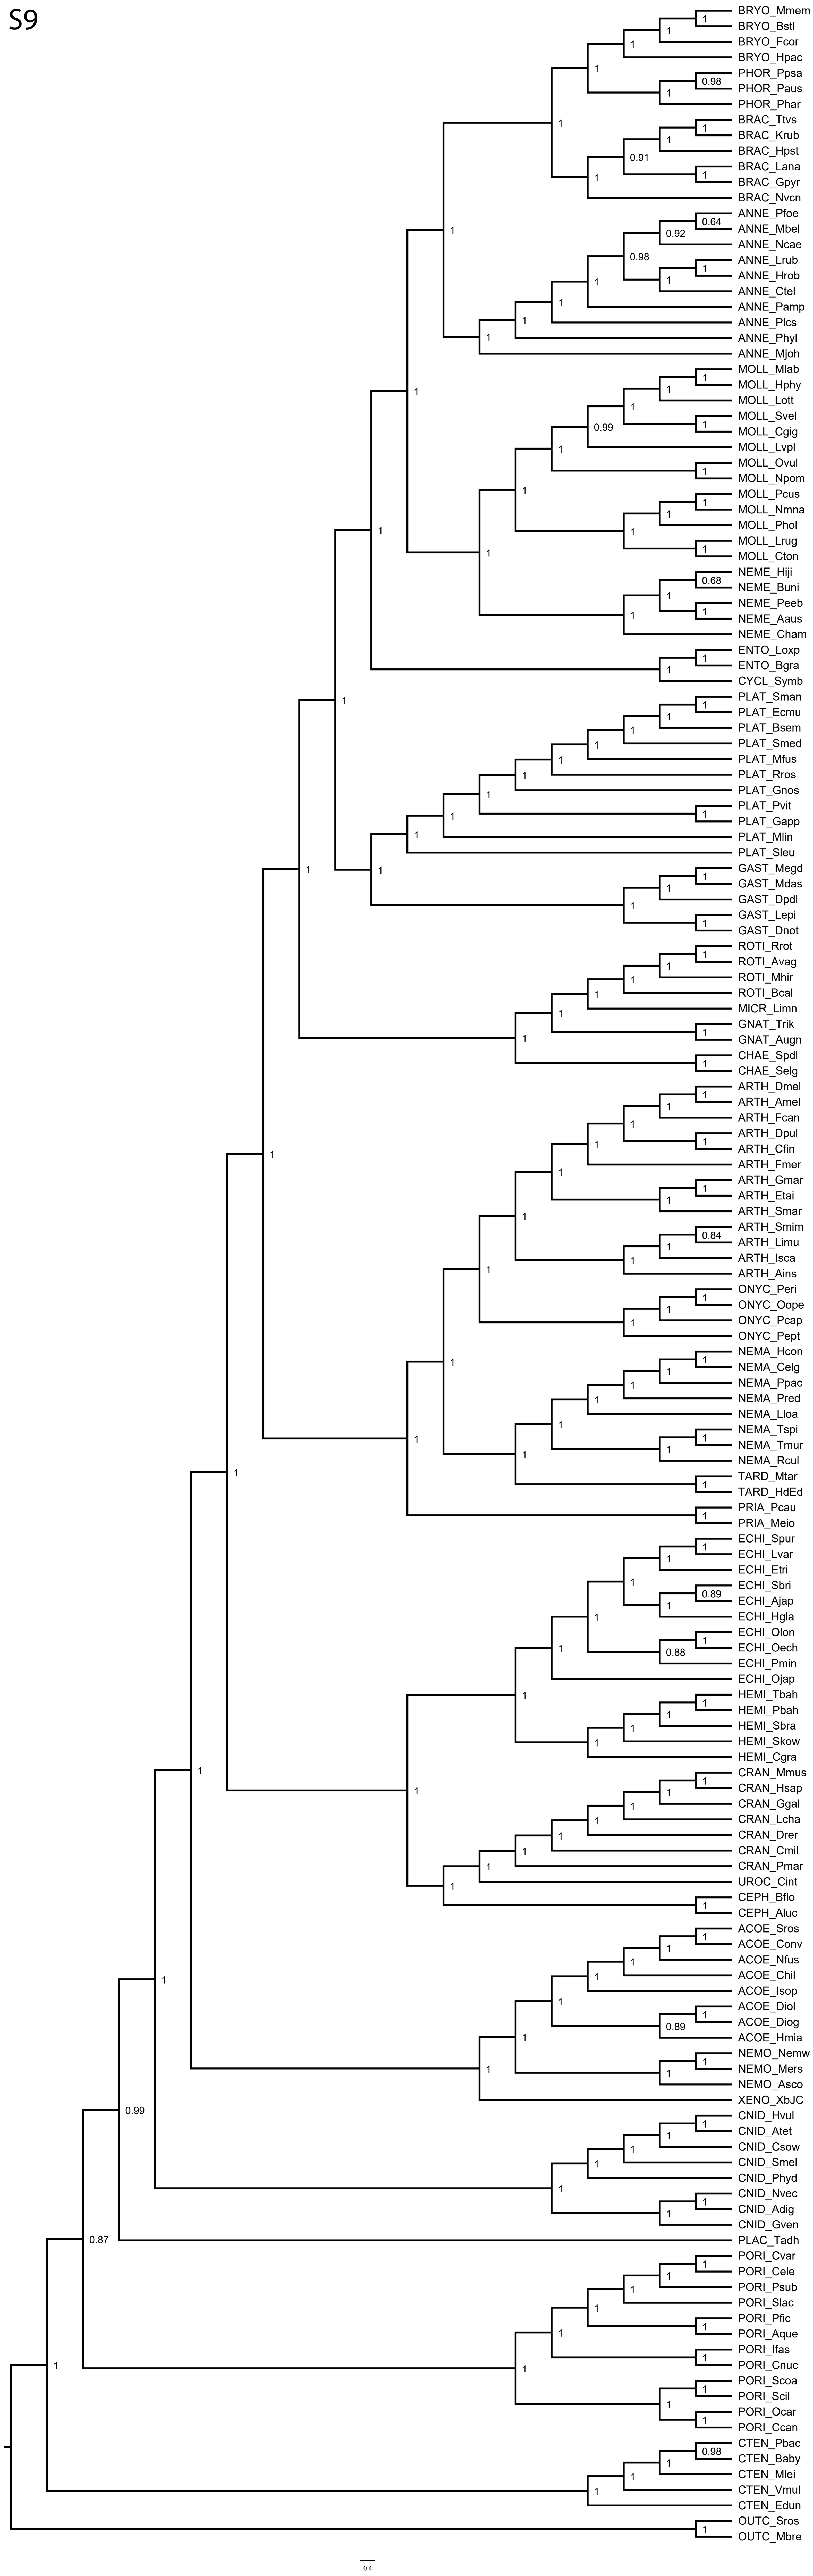

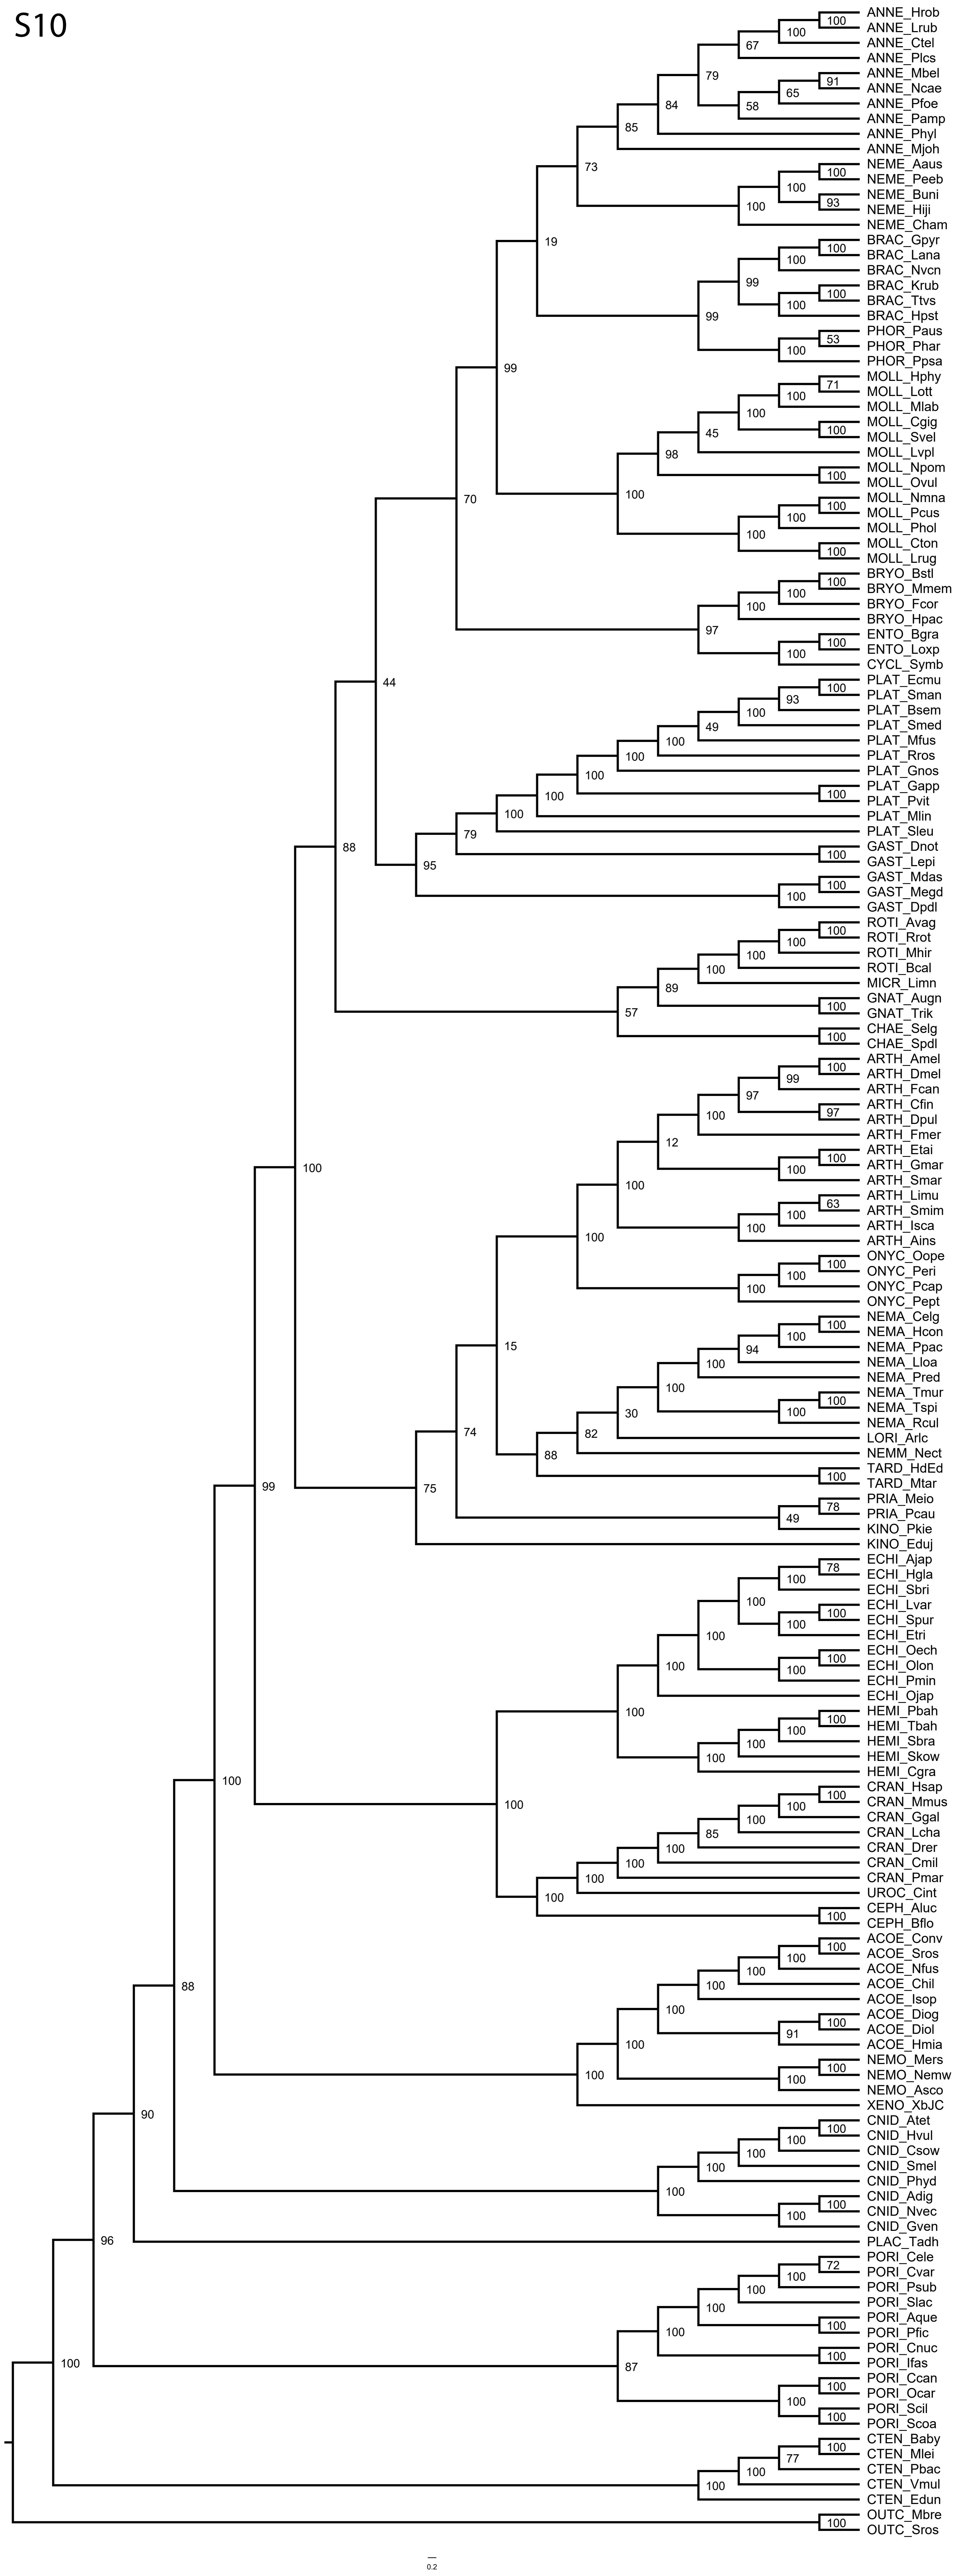

S11

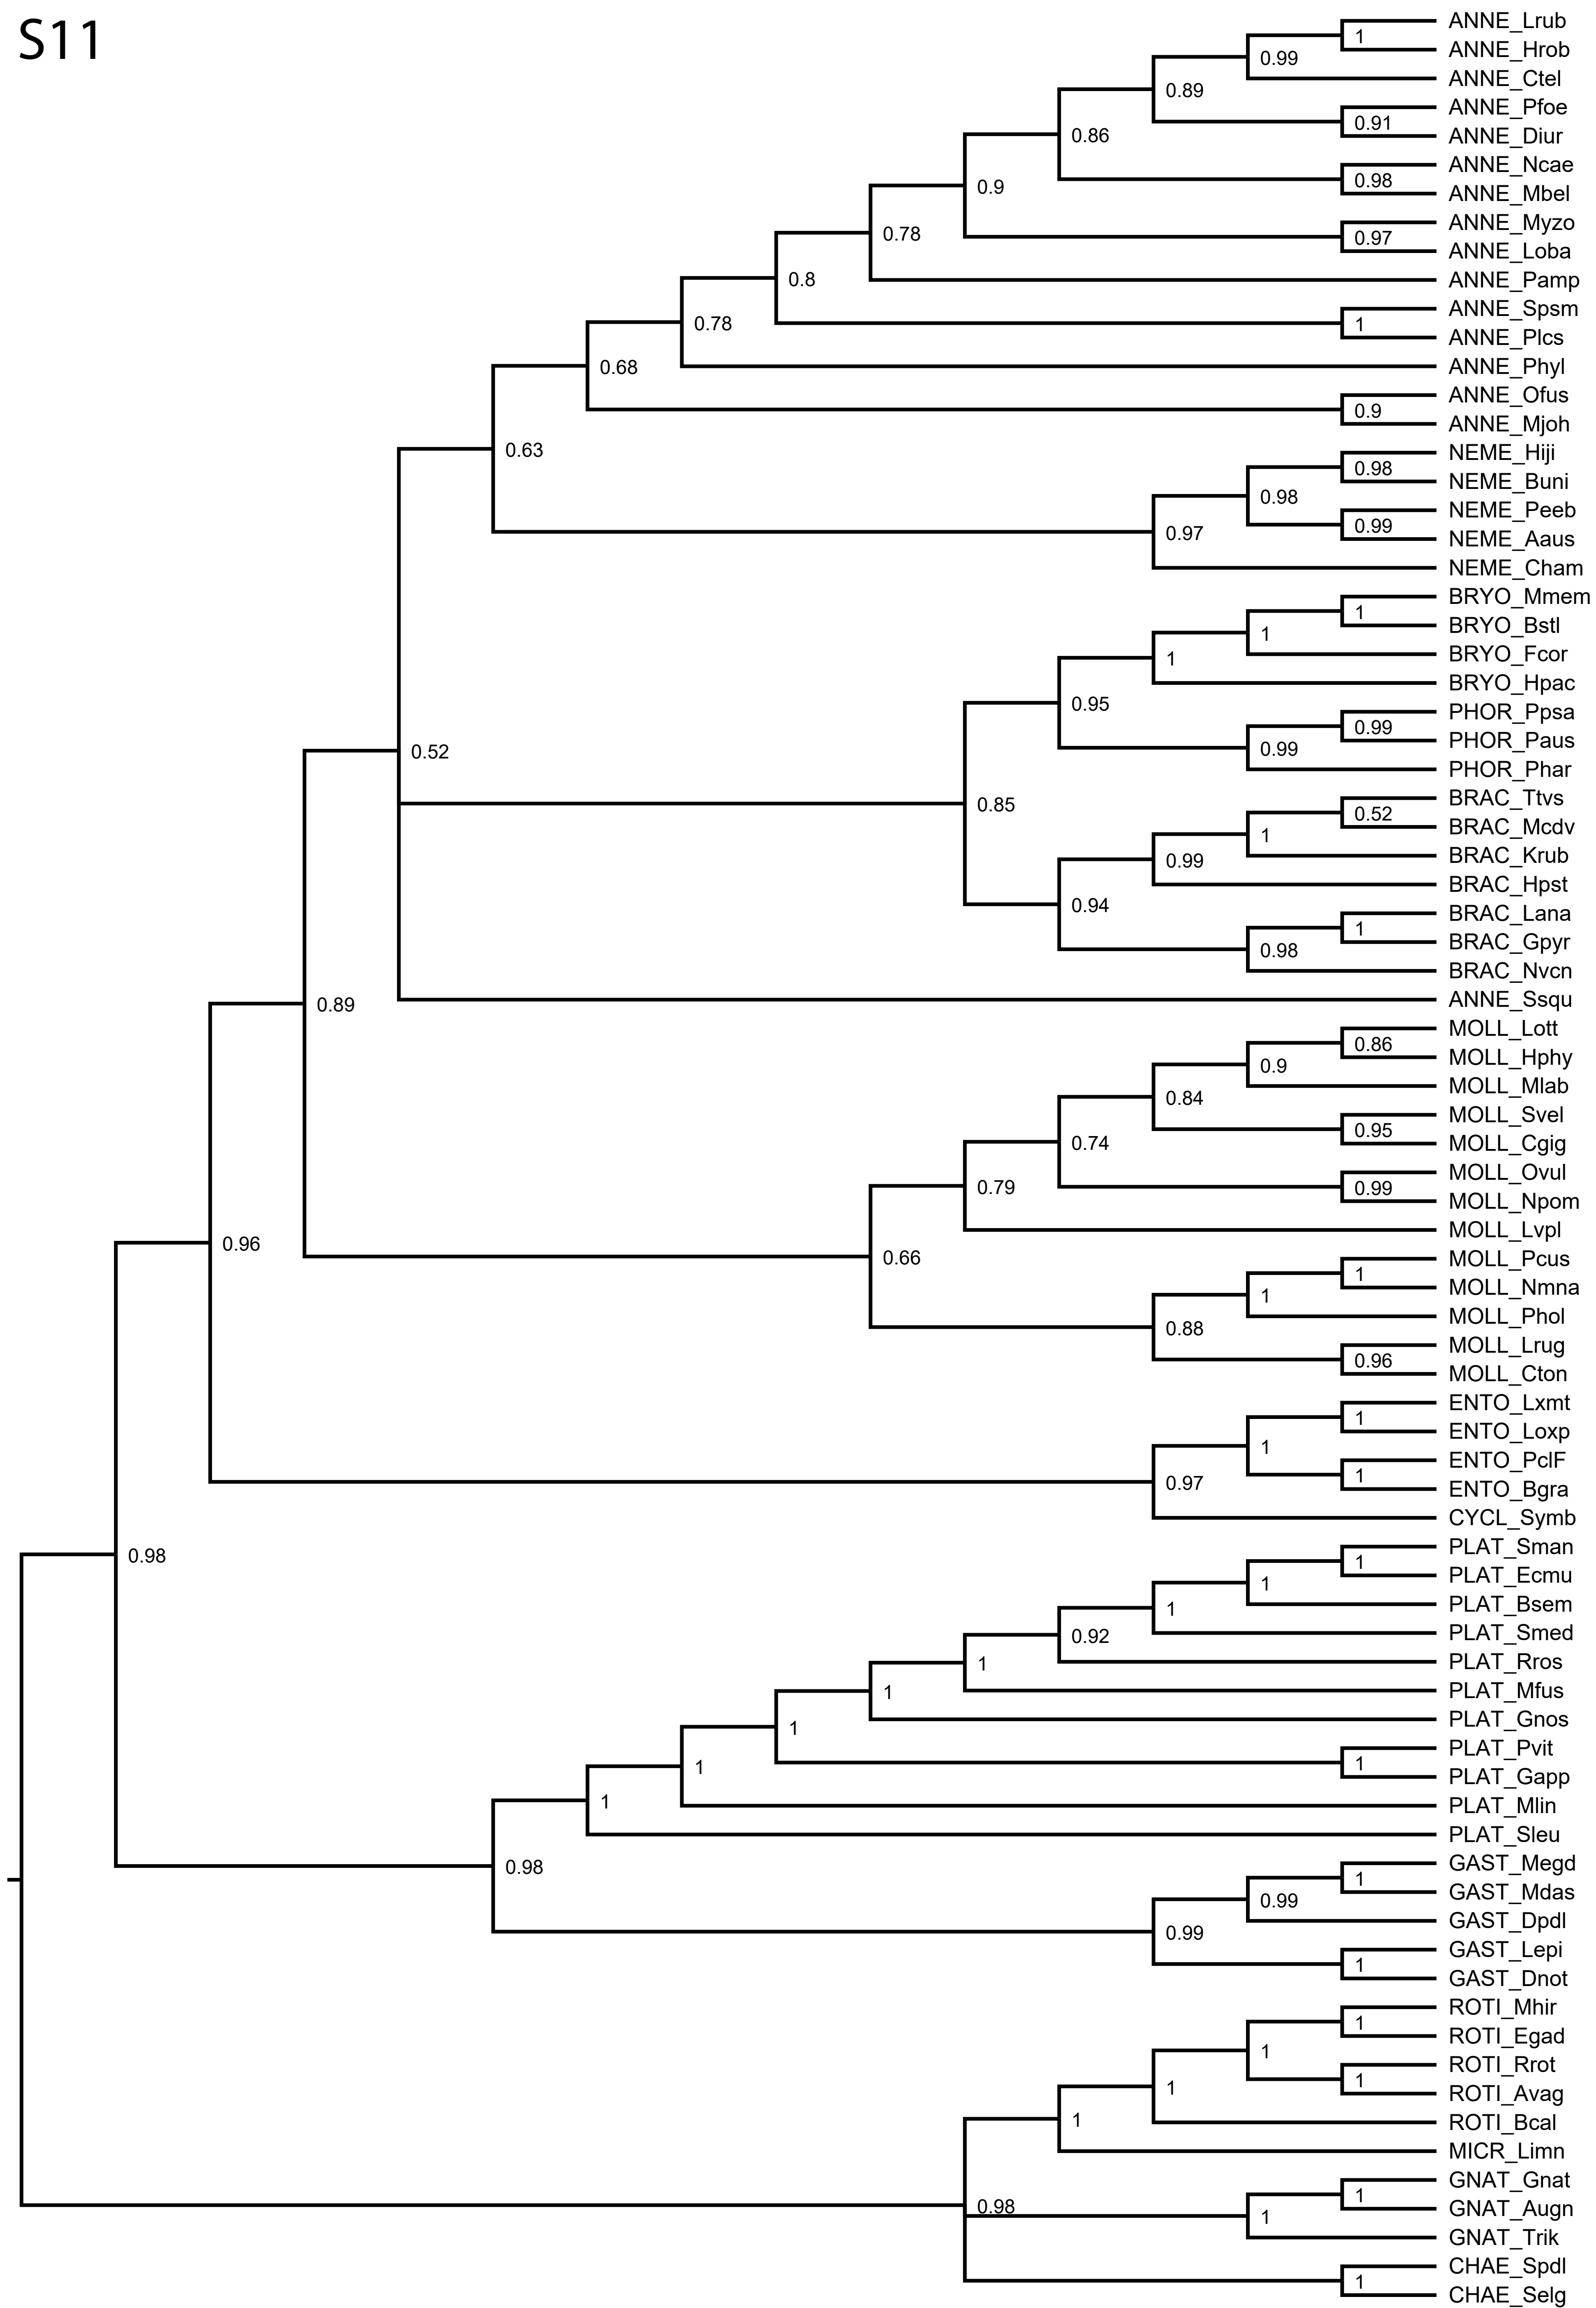

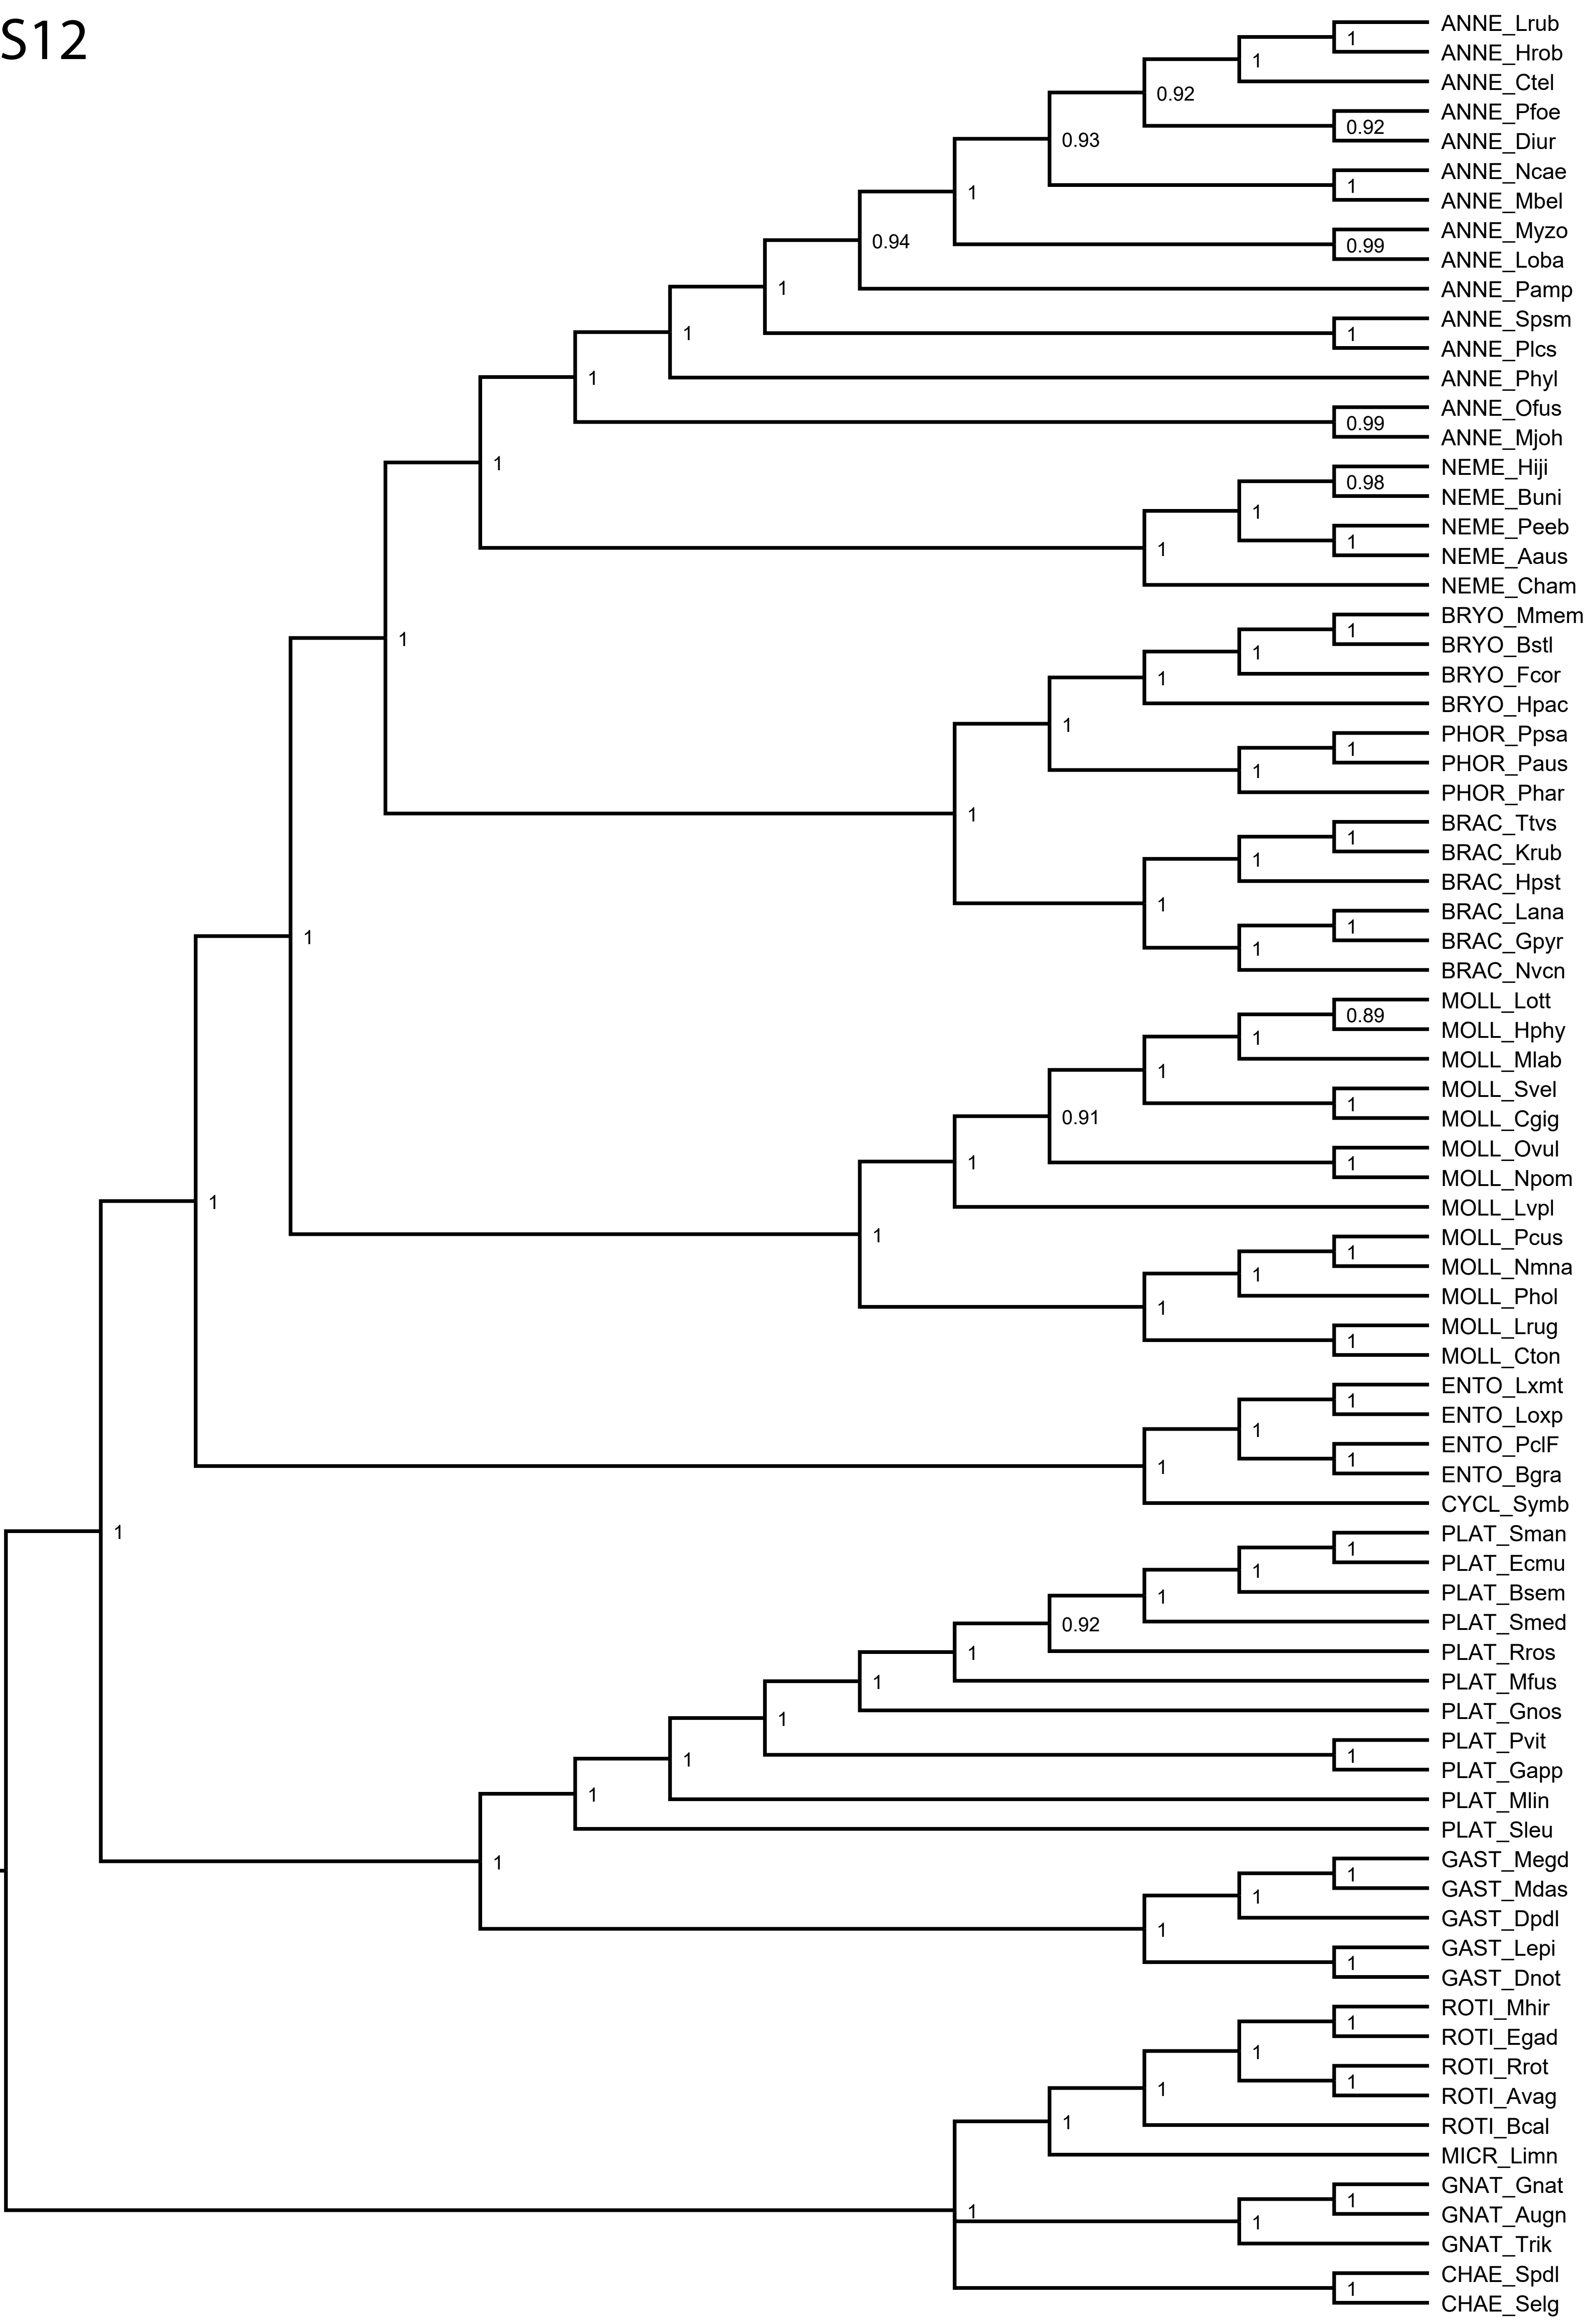

S13

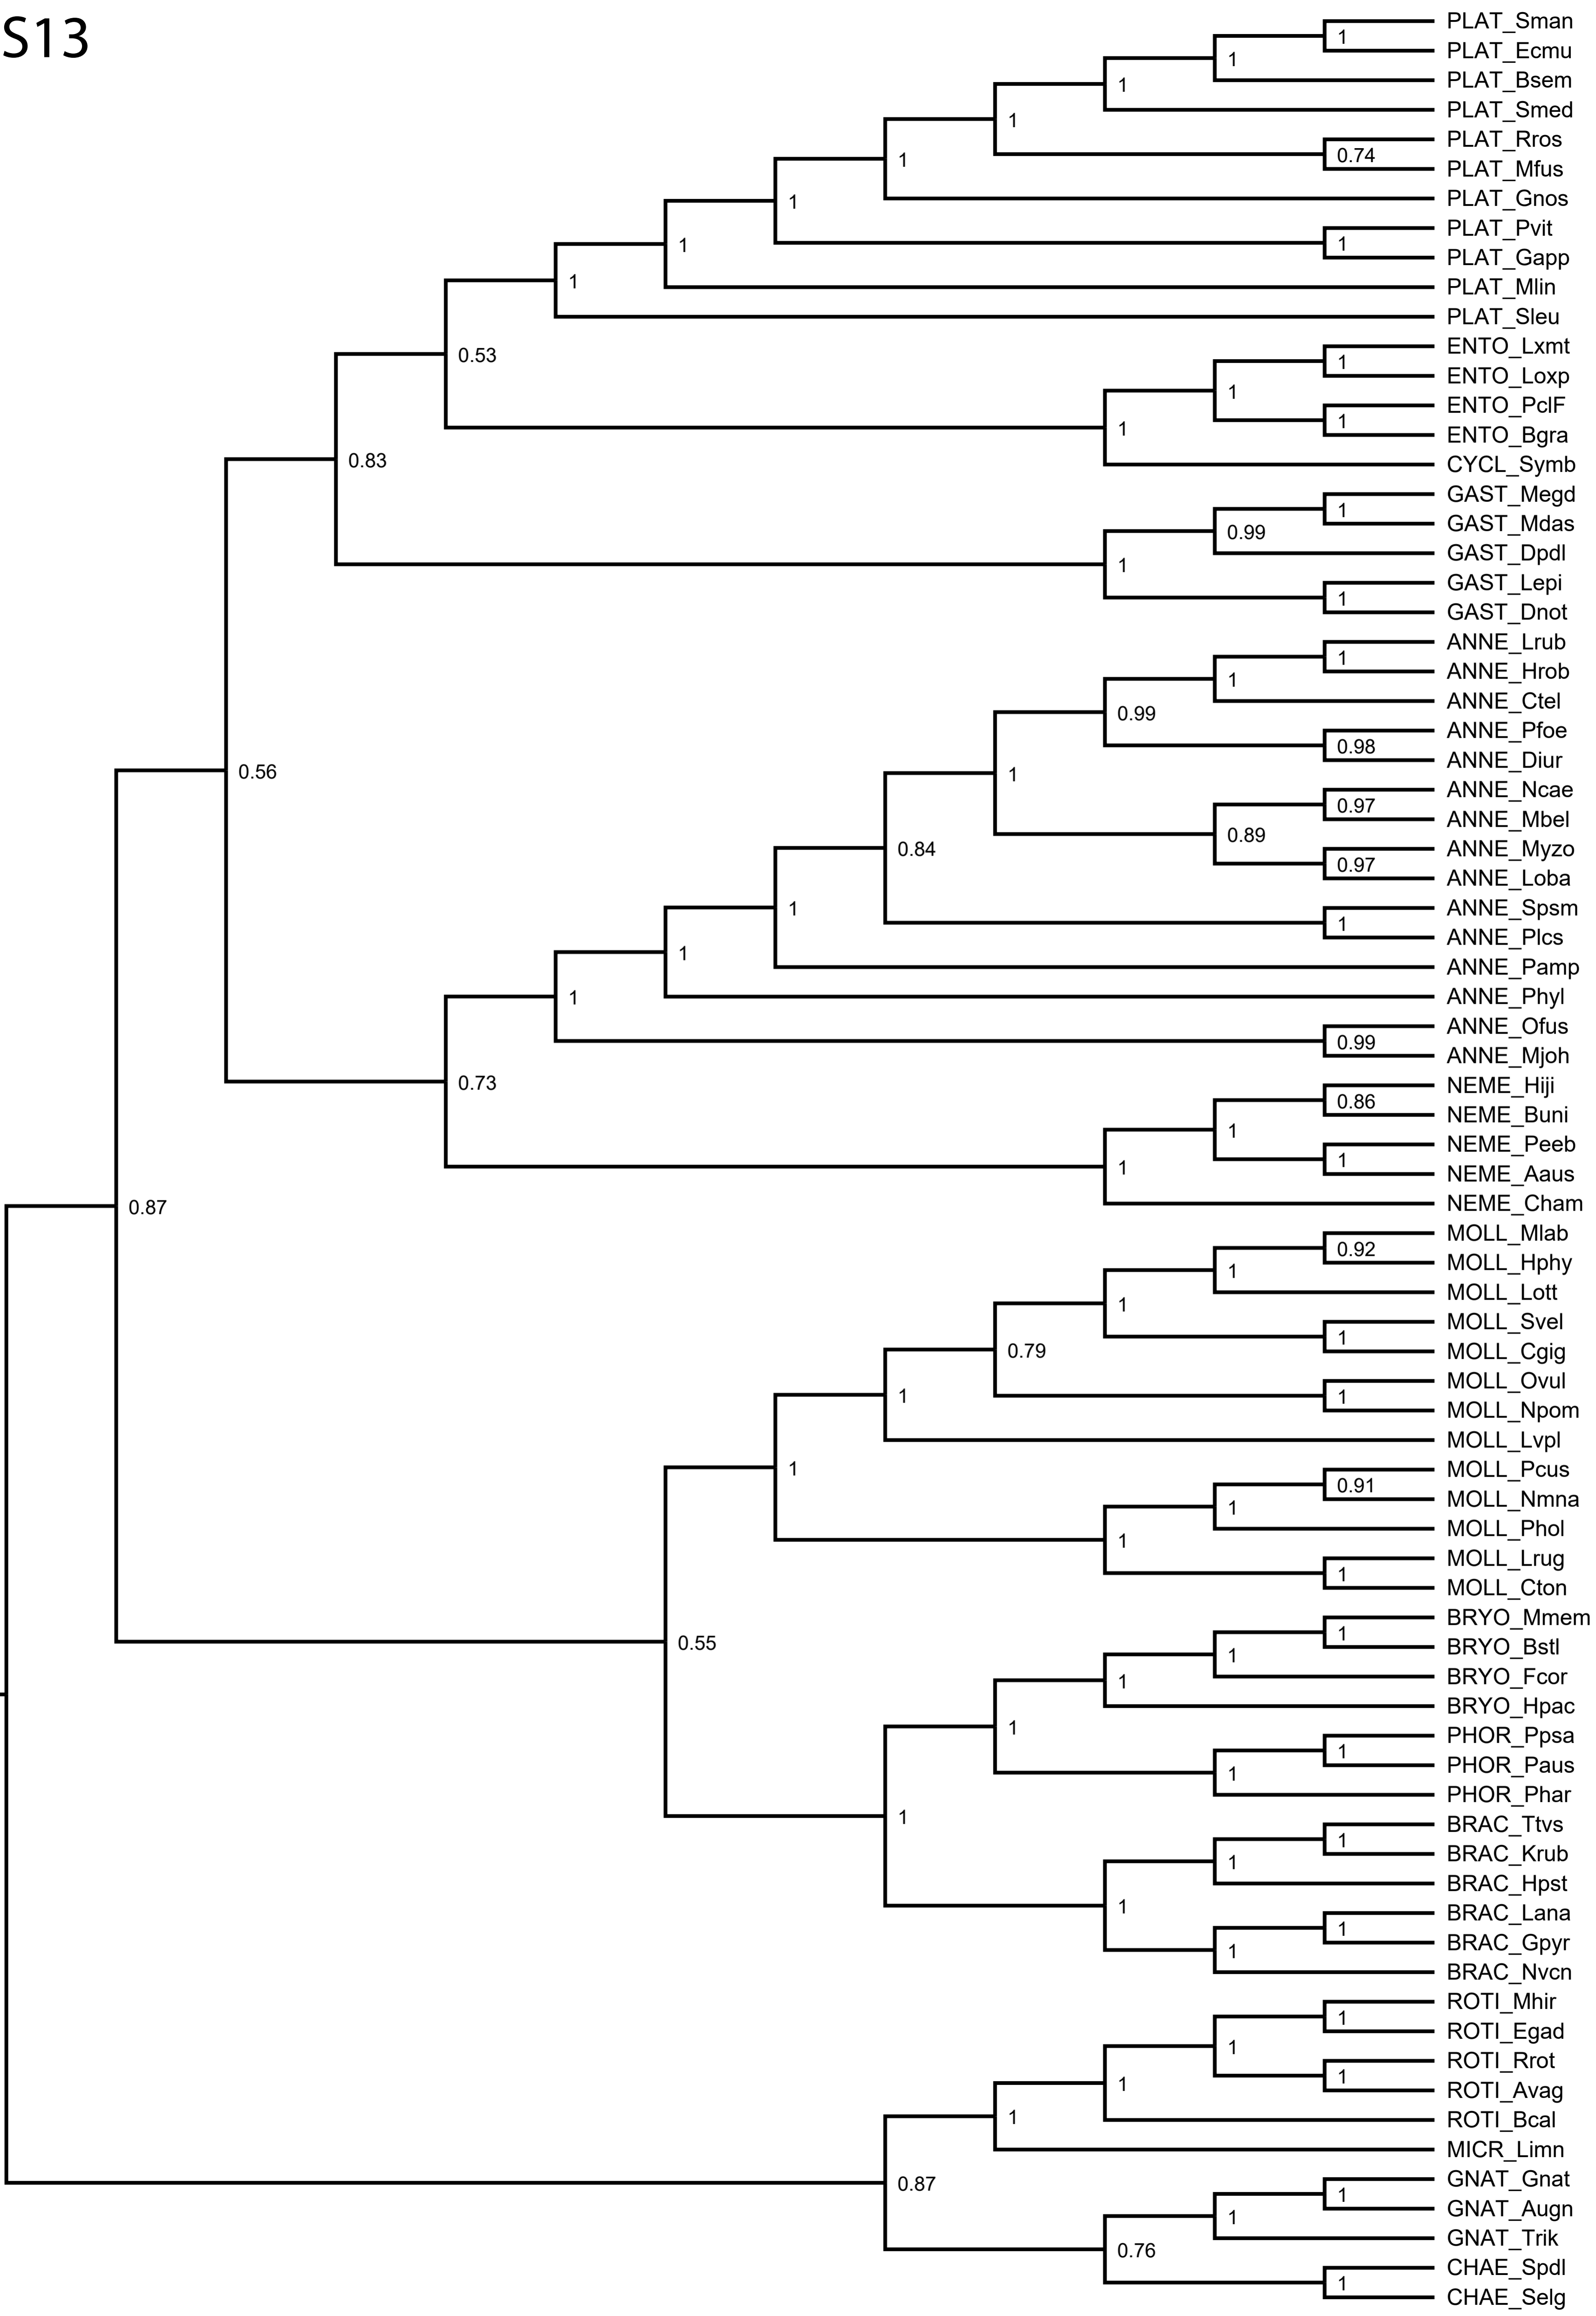



S14

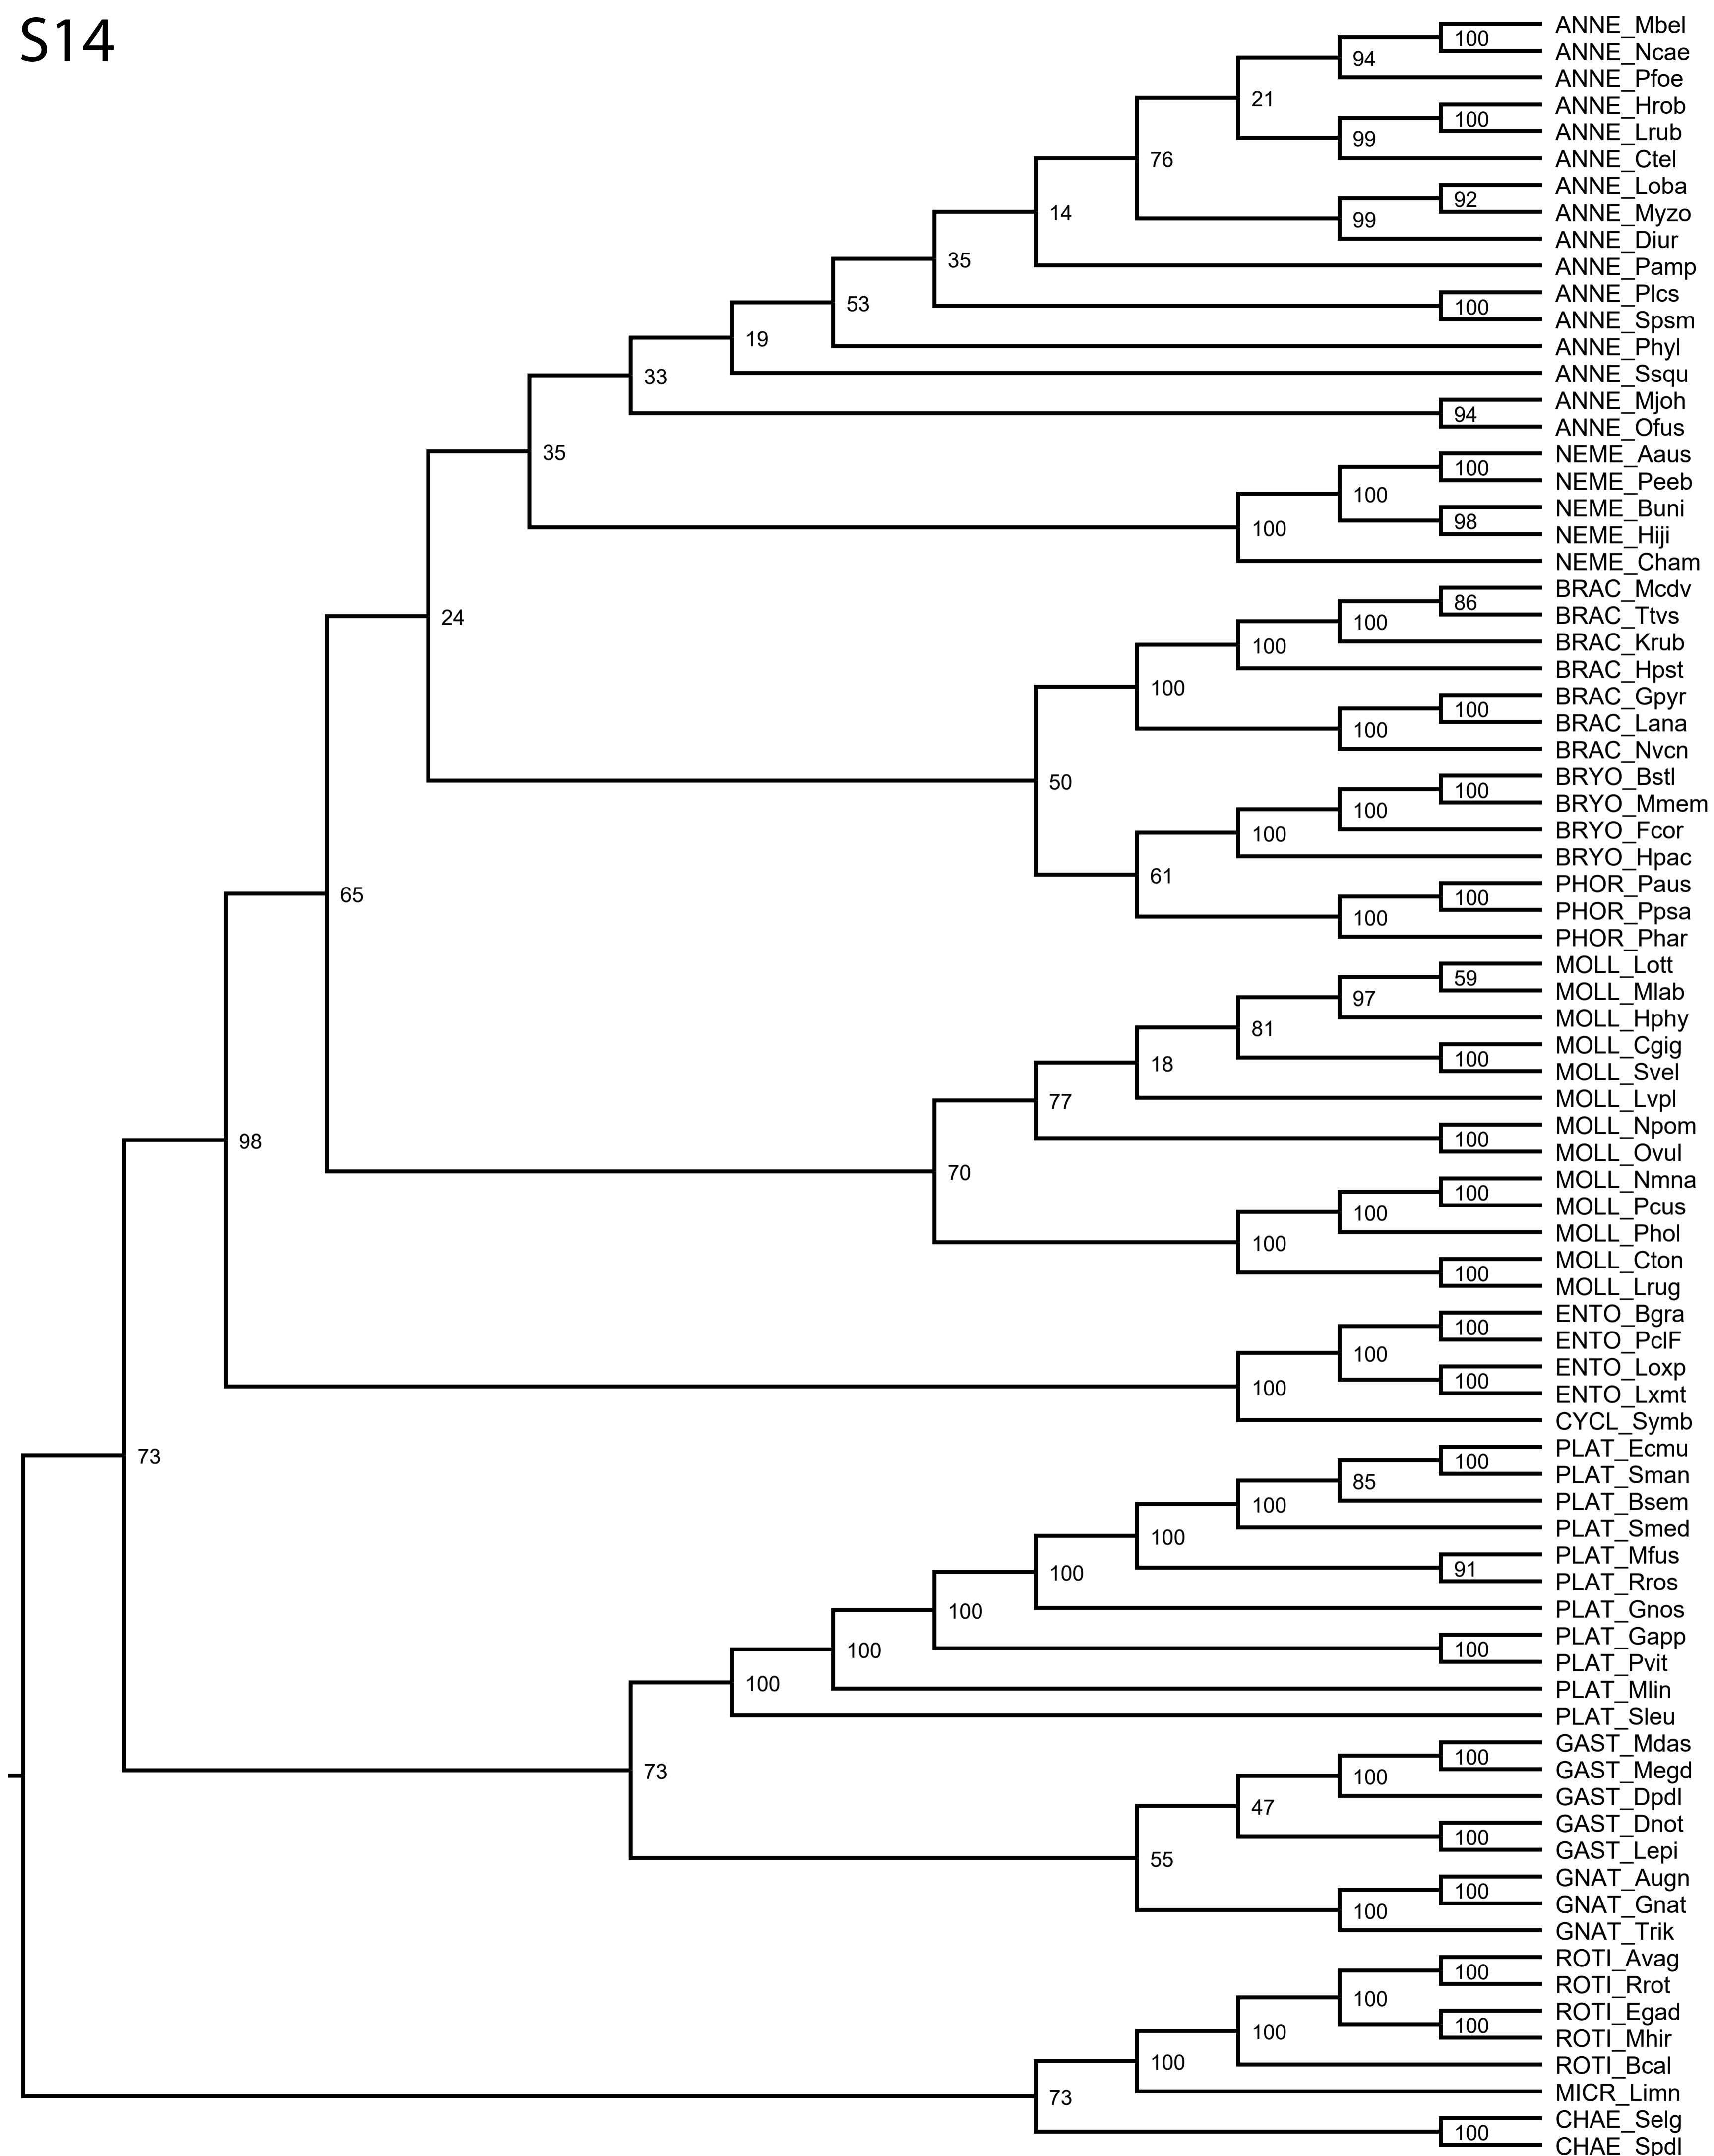

S15

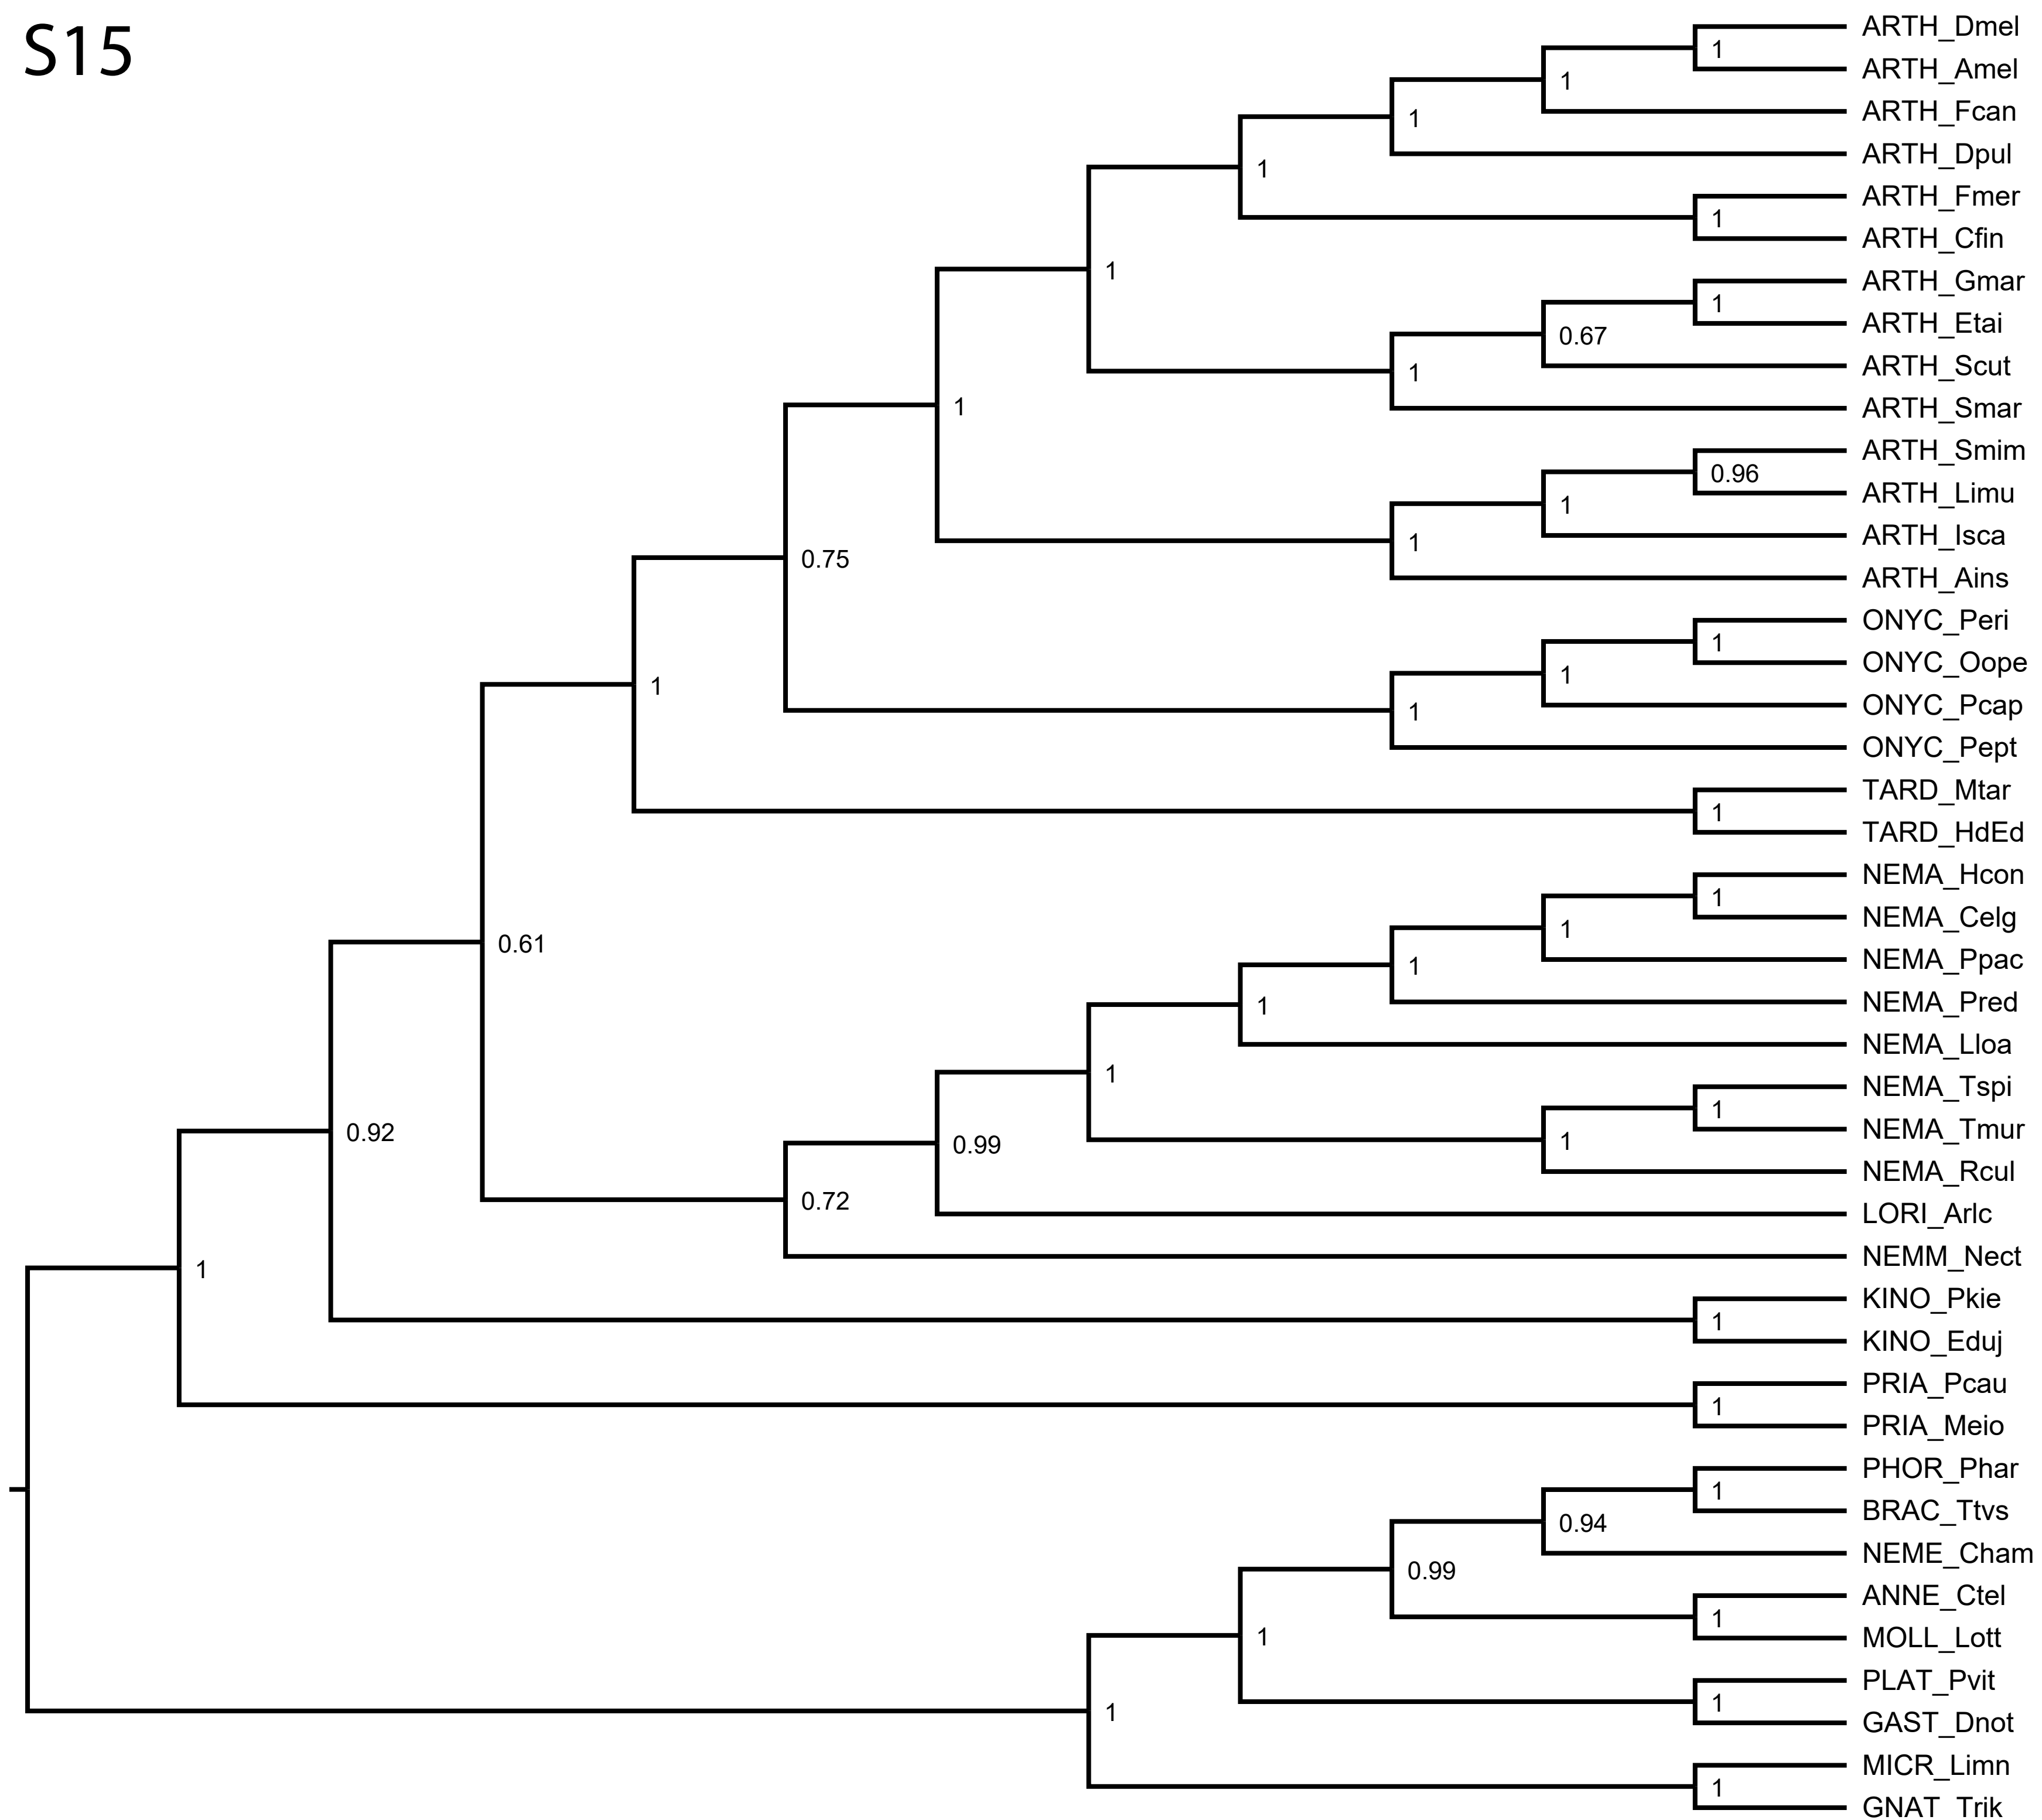

0.3

S16

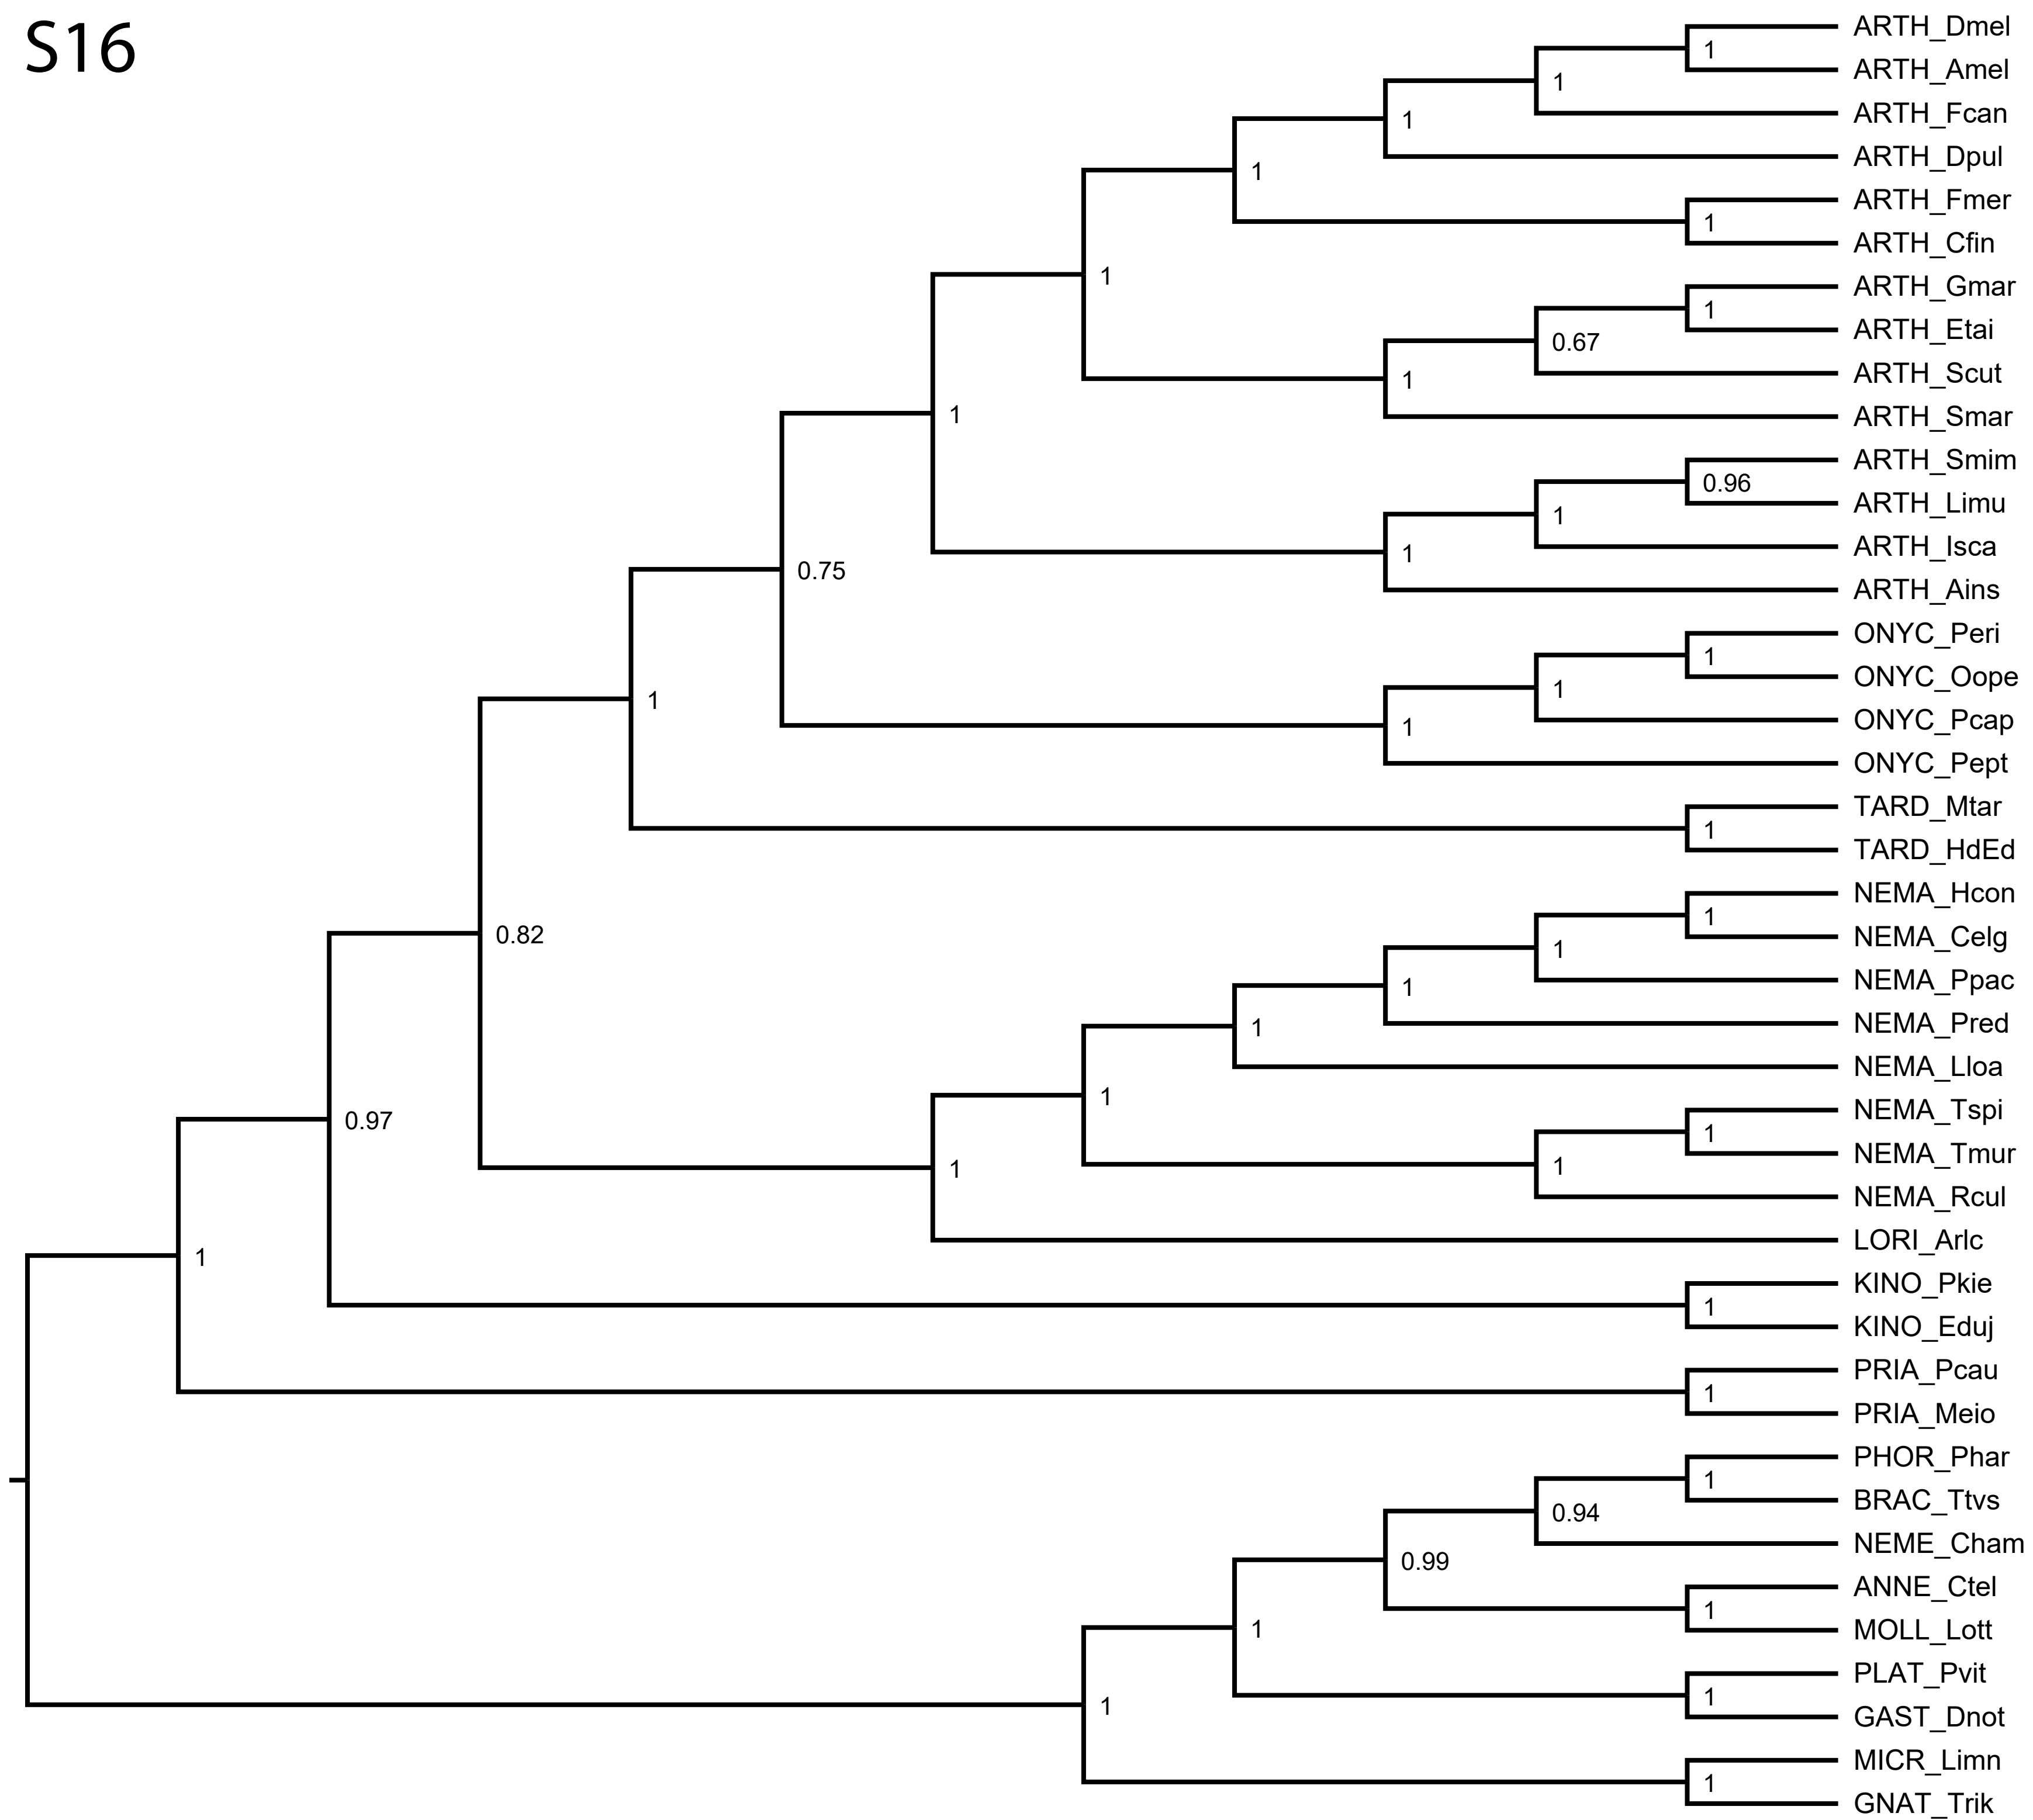

0.3

S17

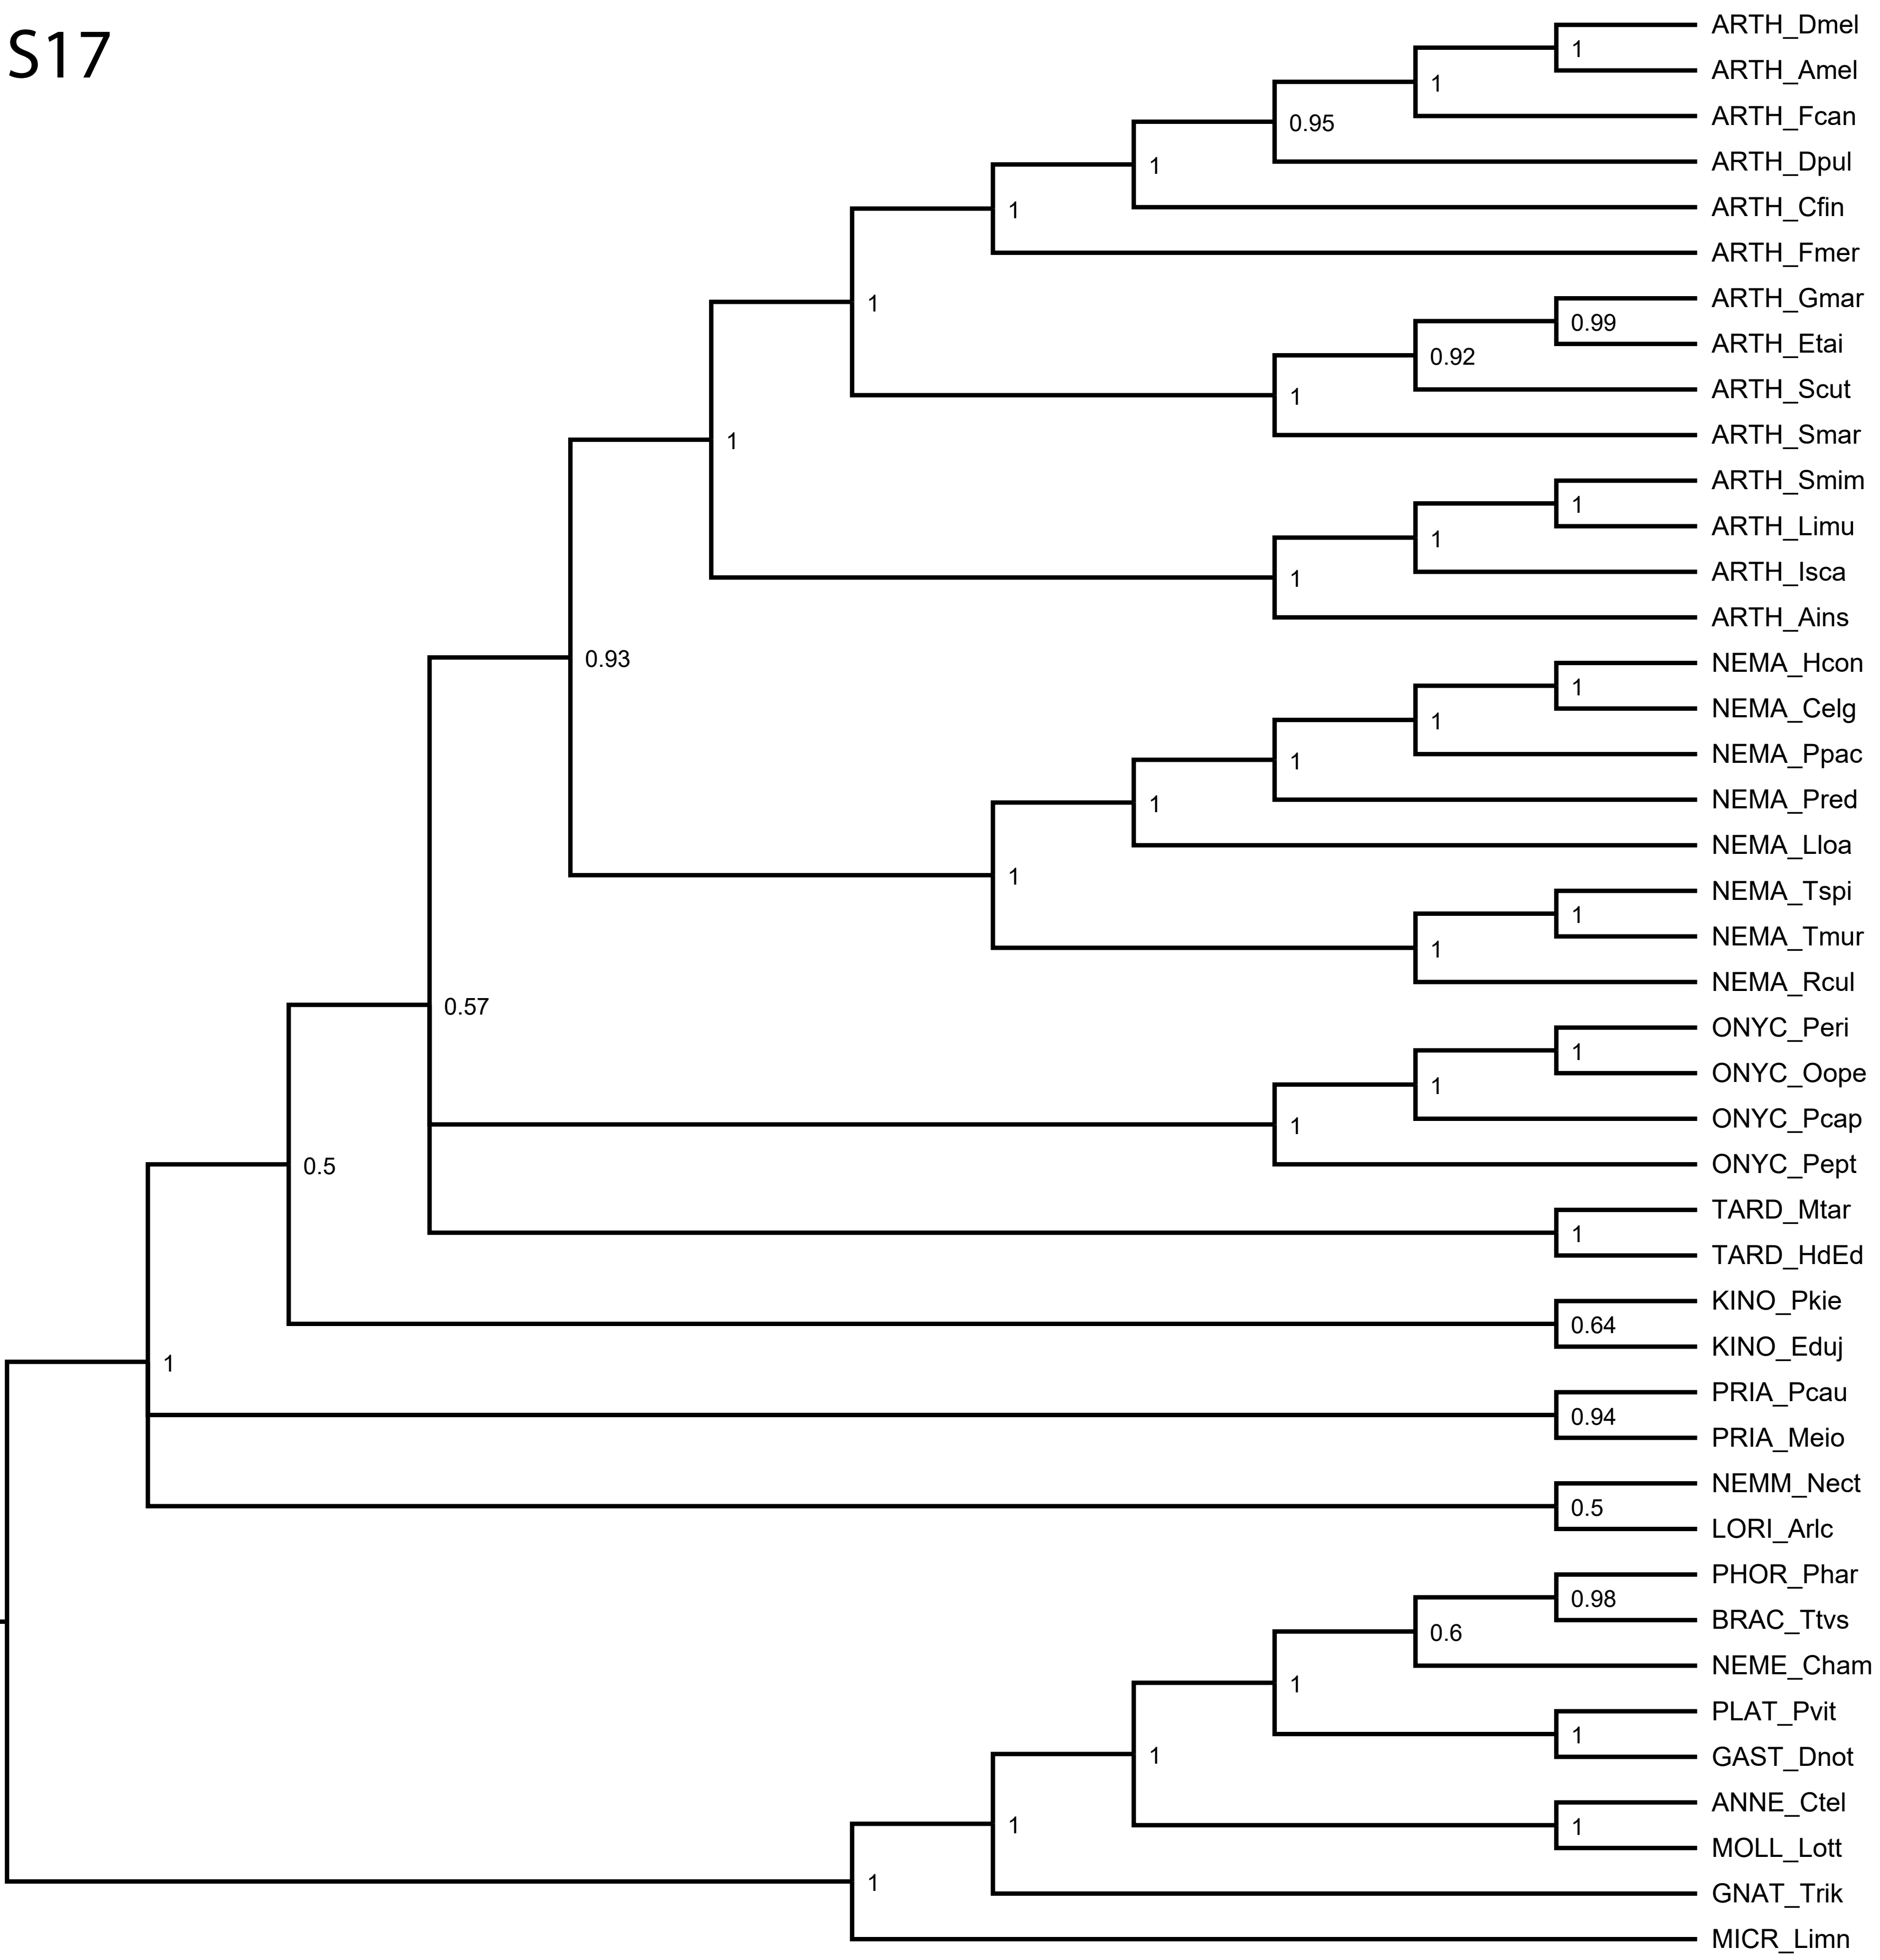

# S18

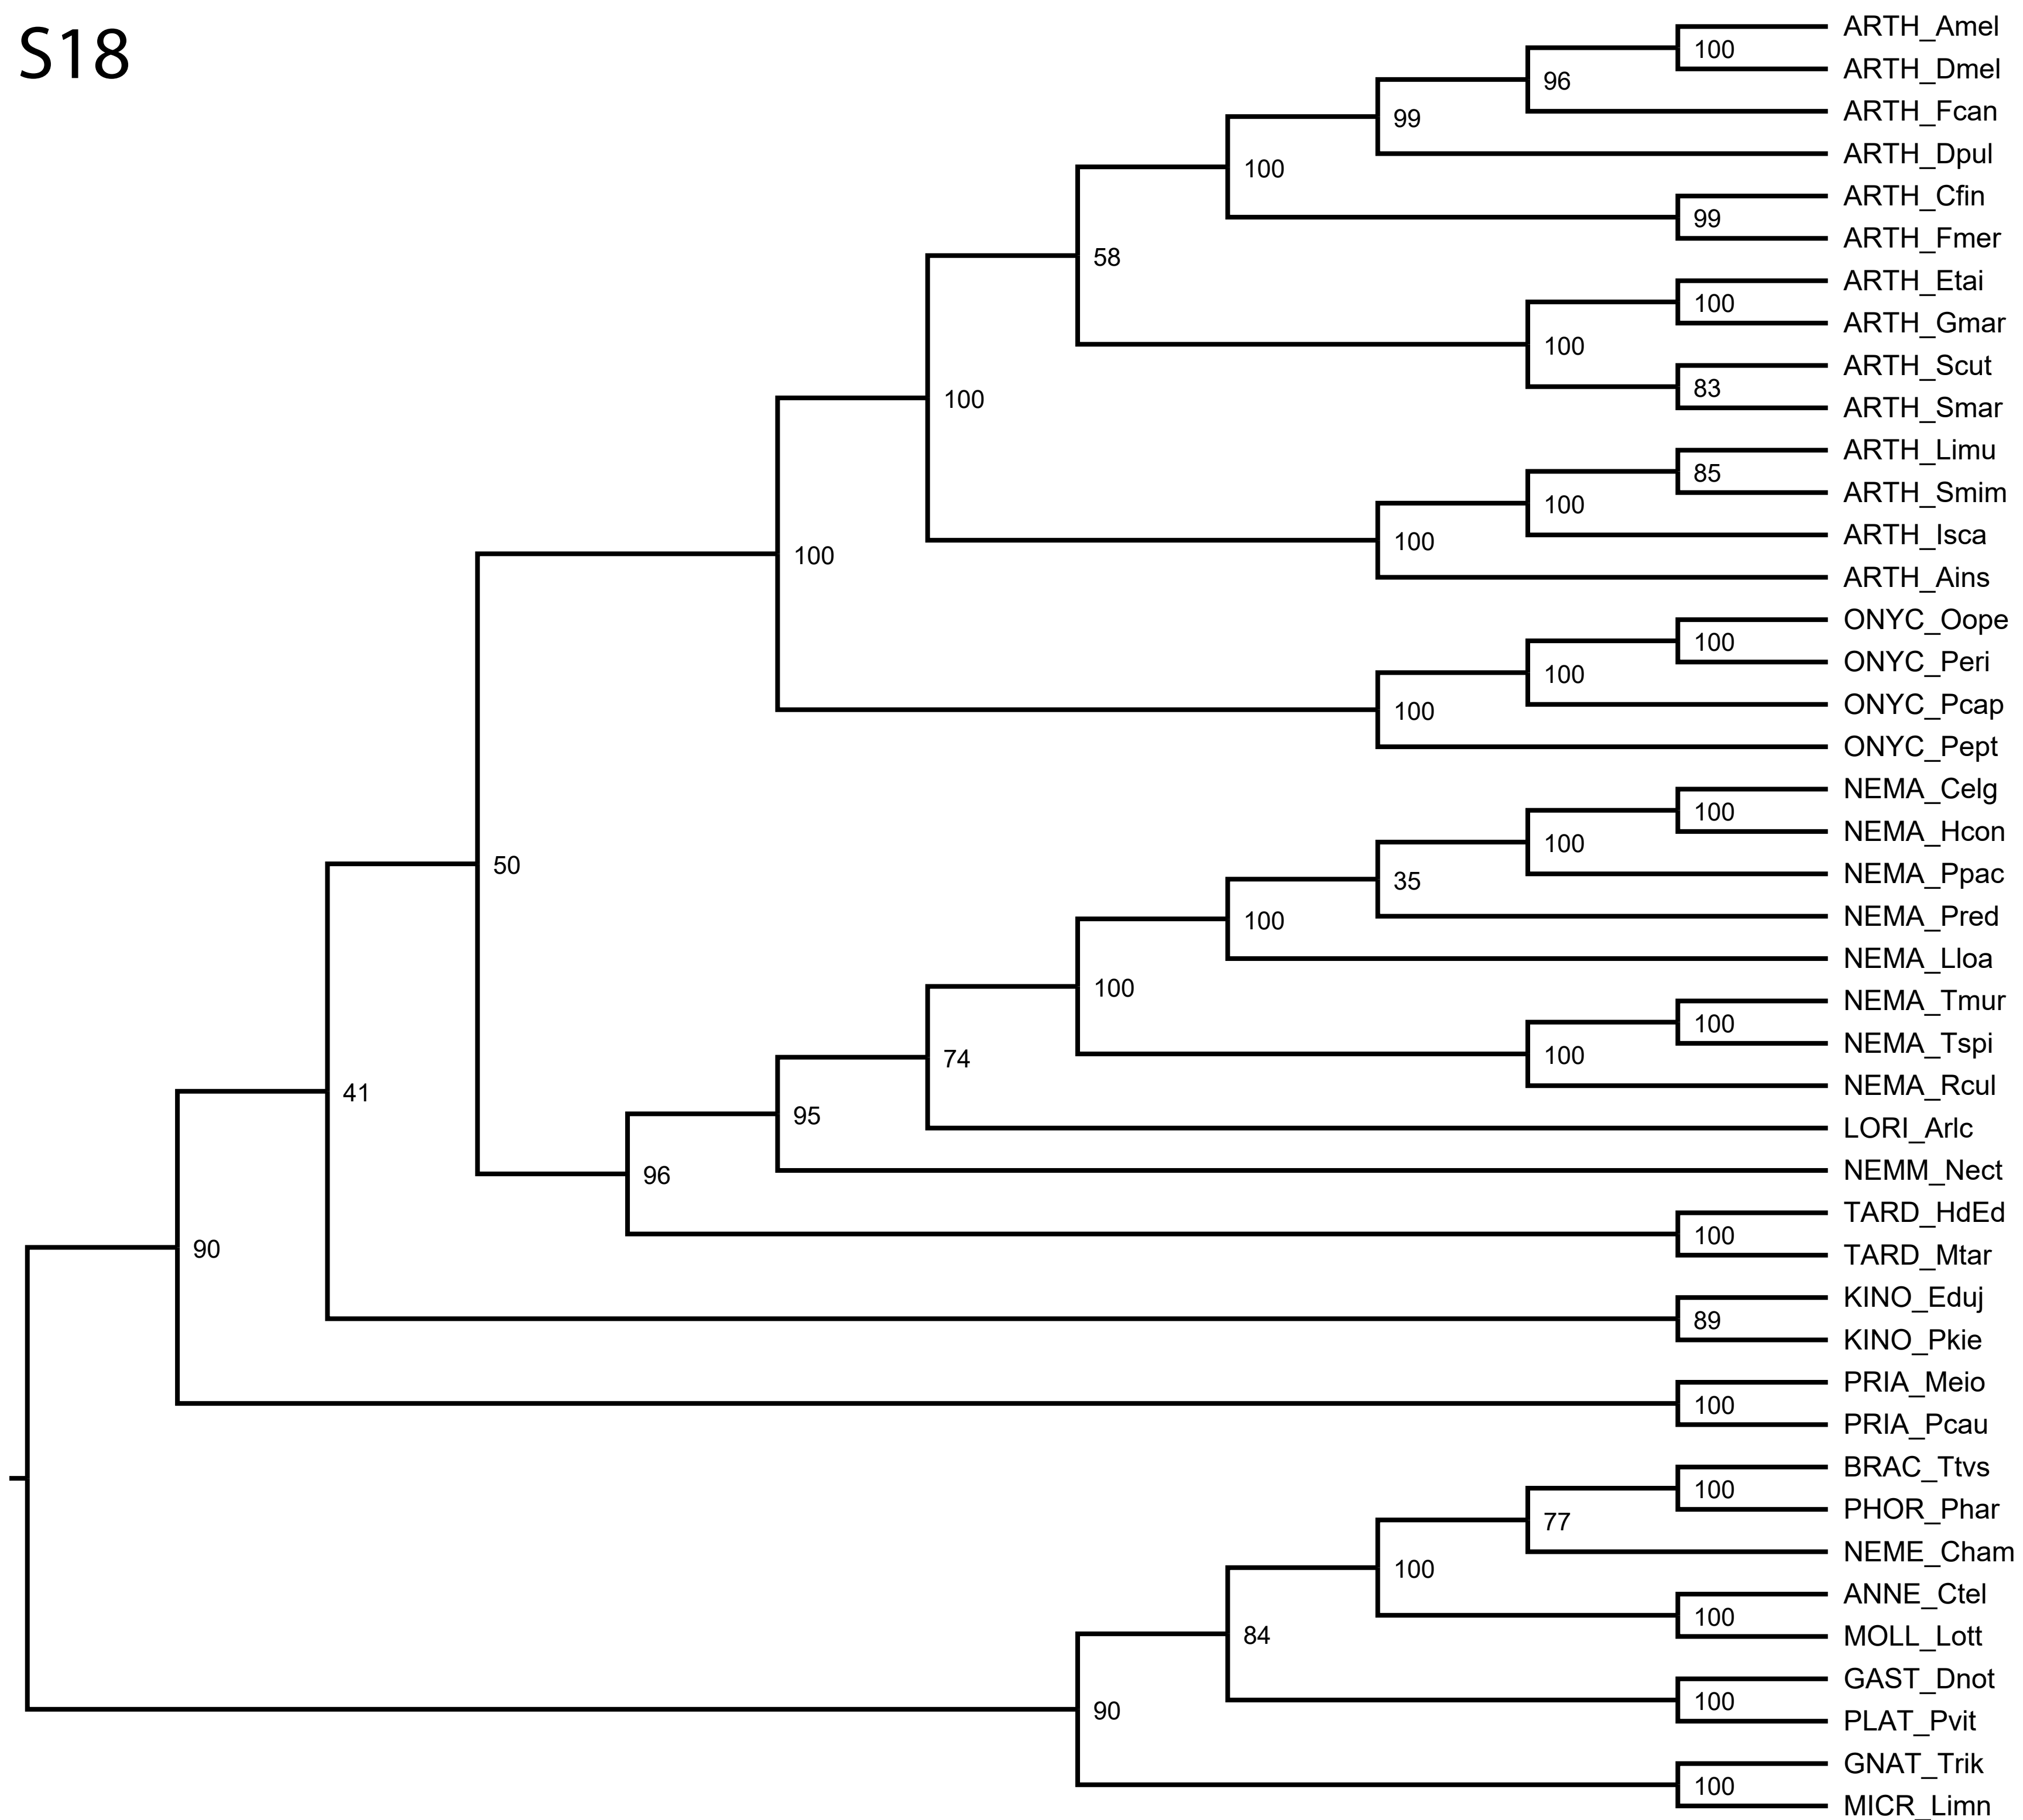

S19

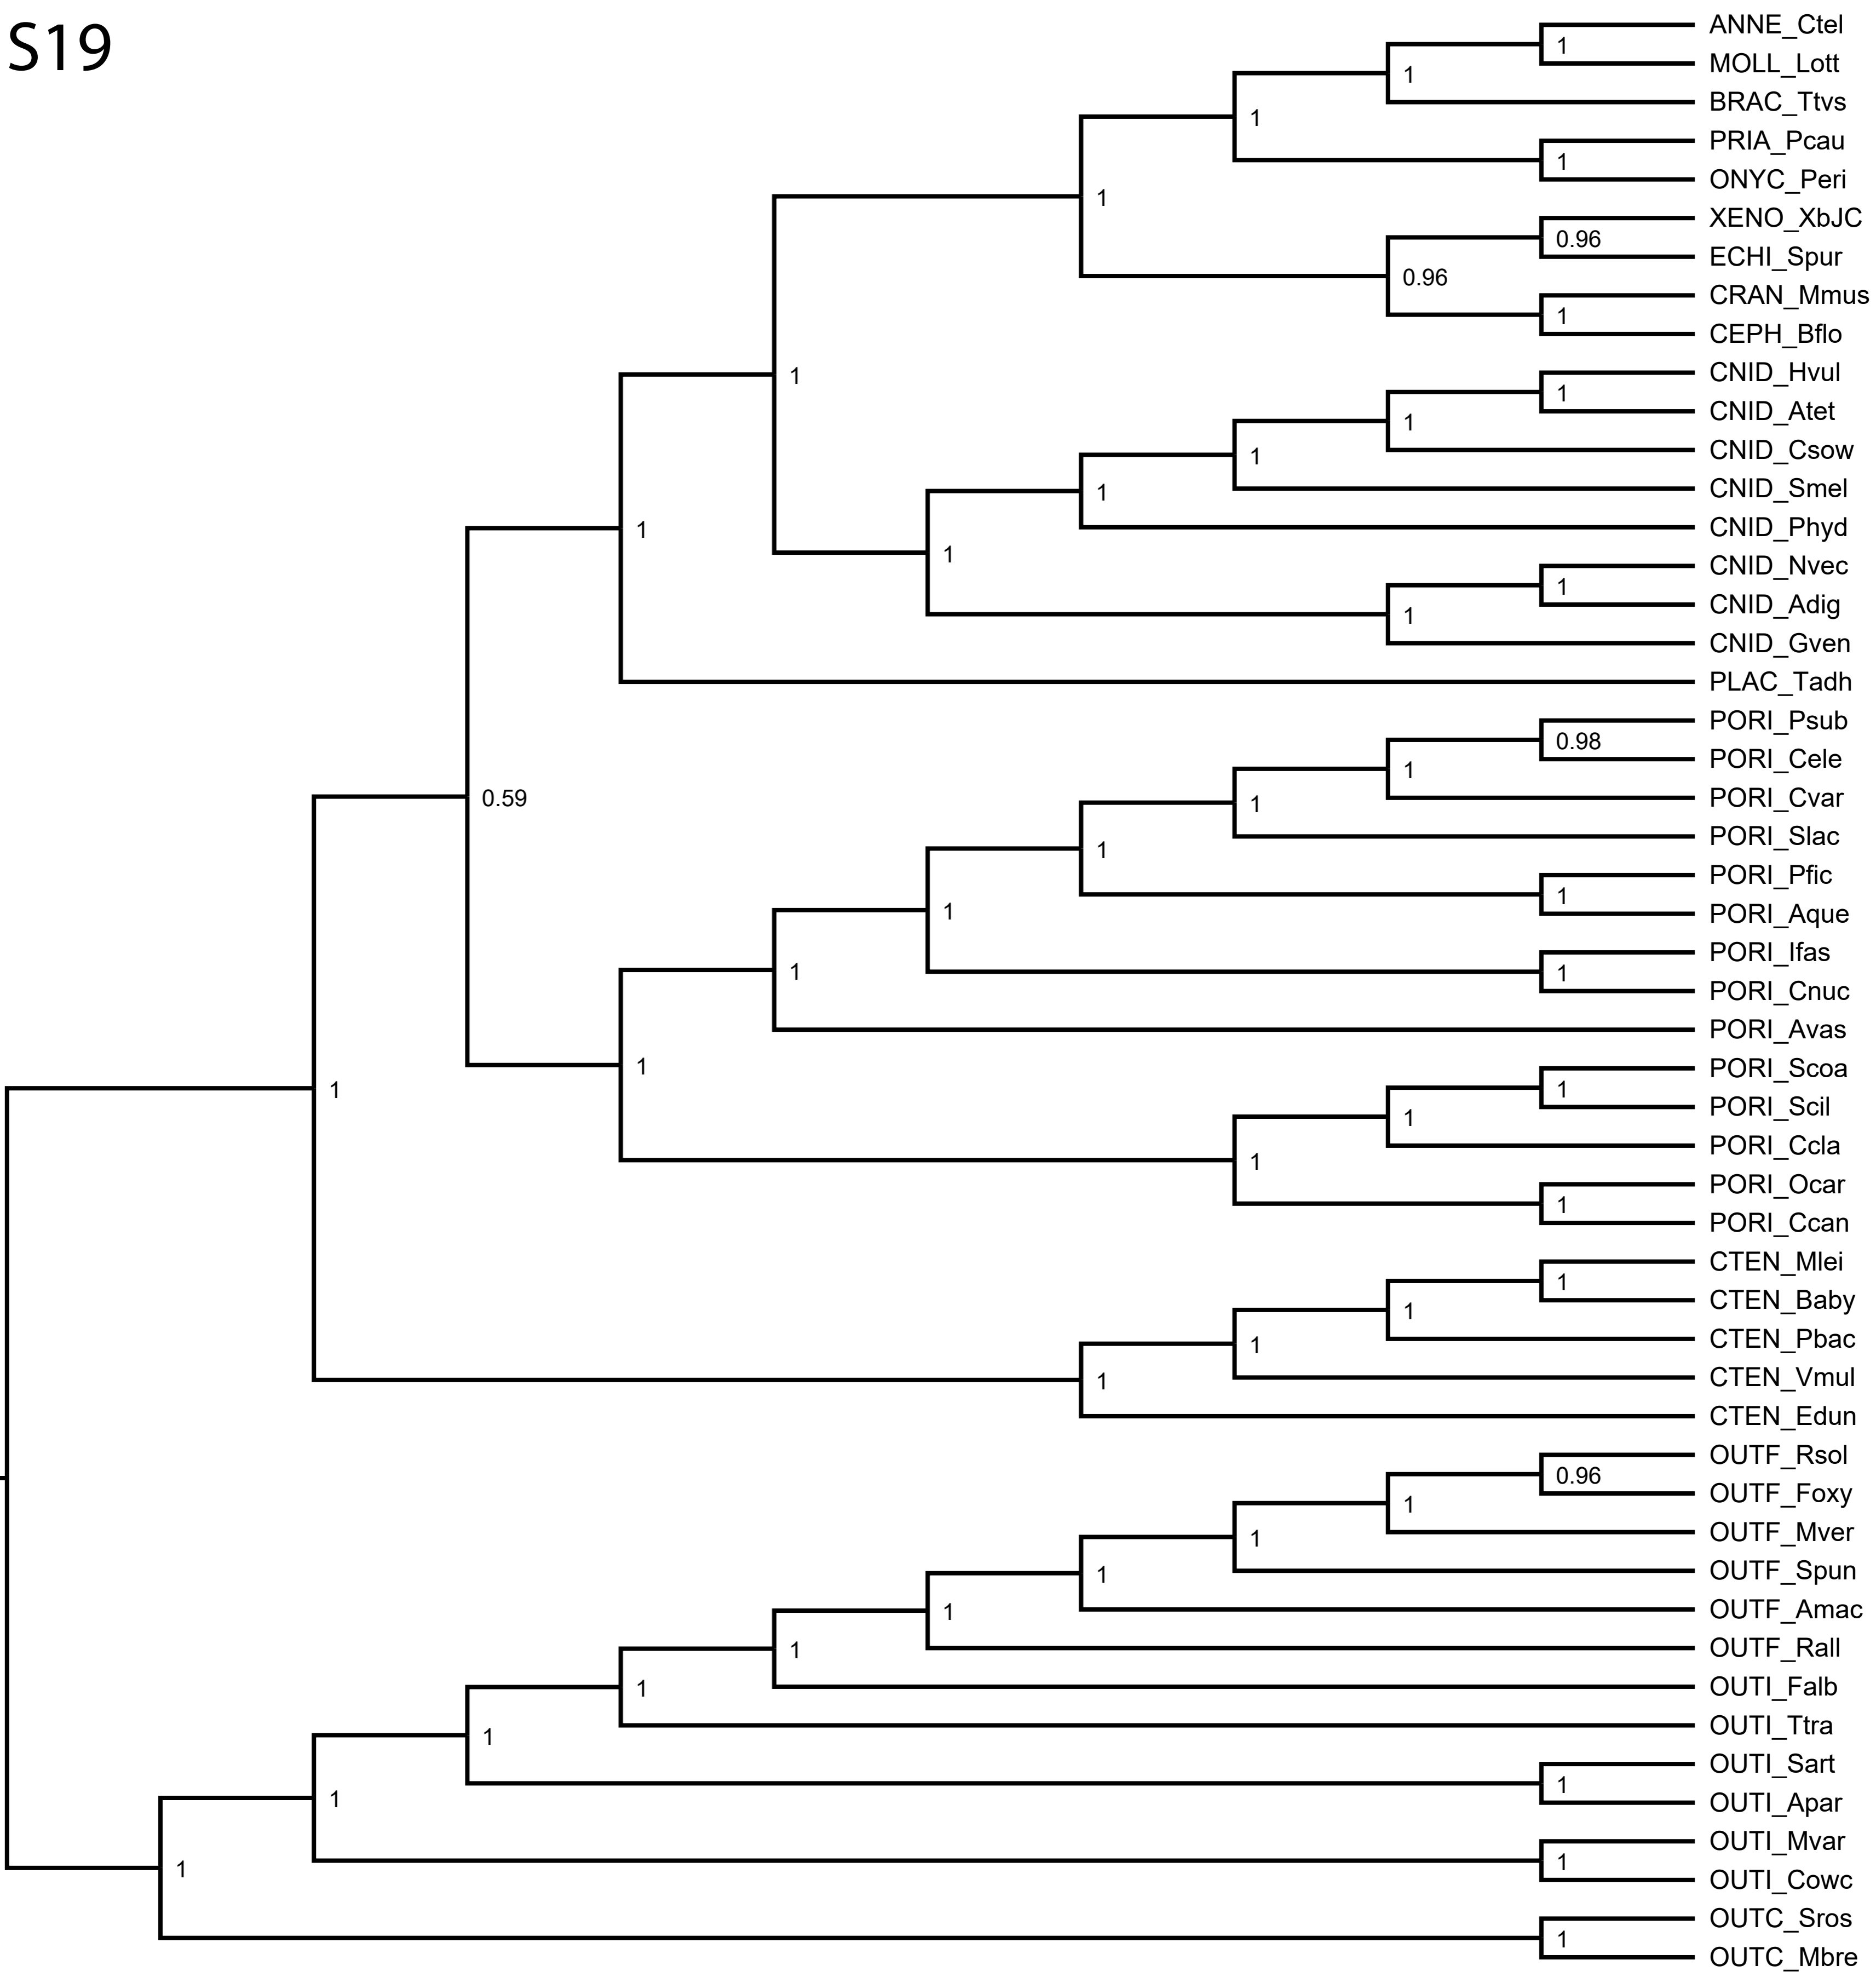

0.5

S20

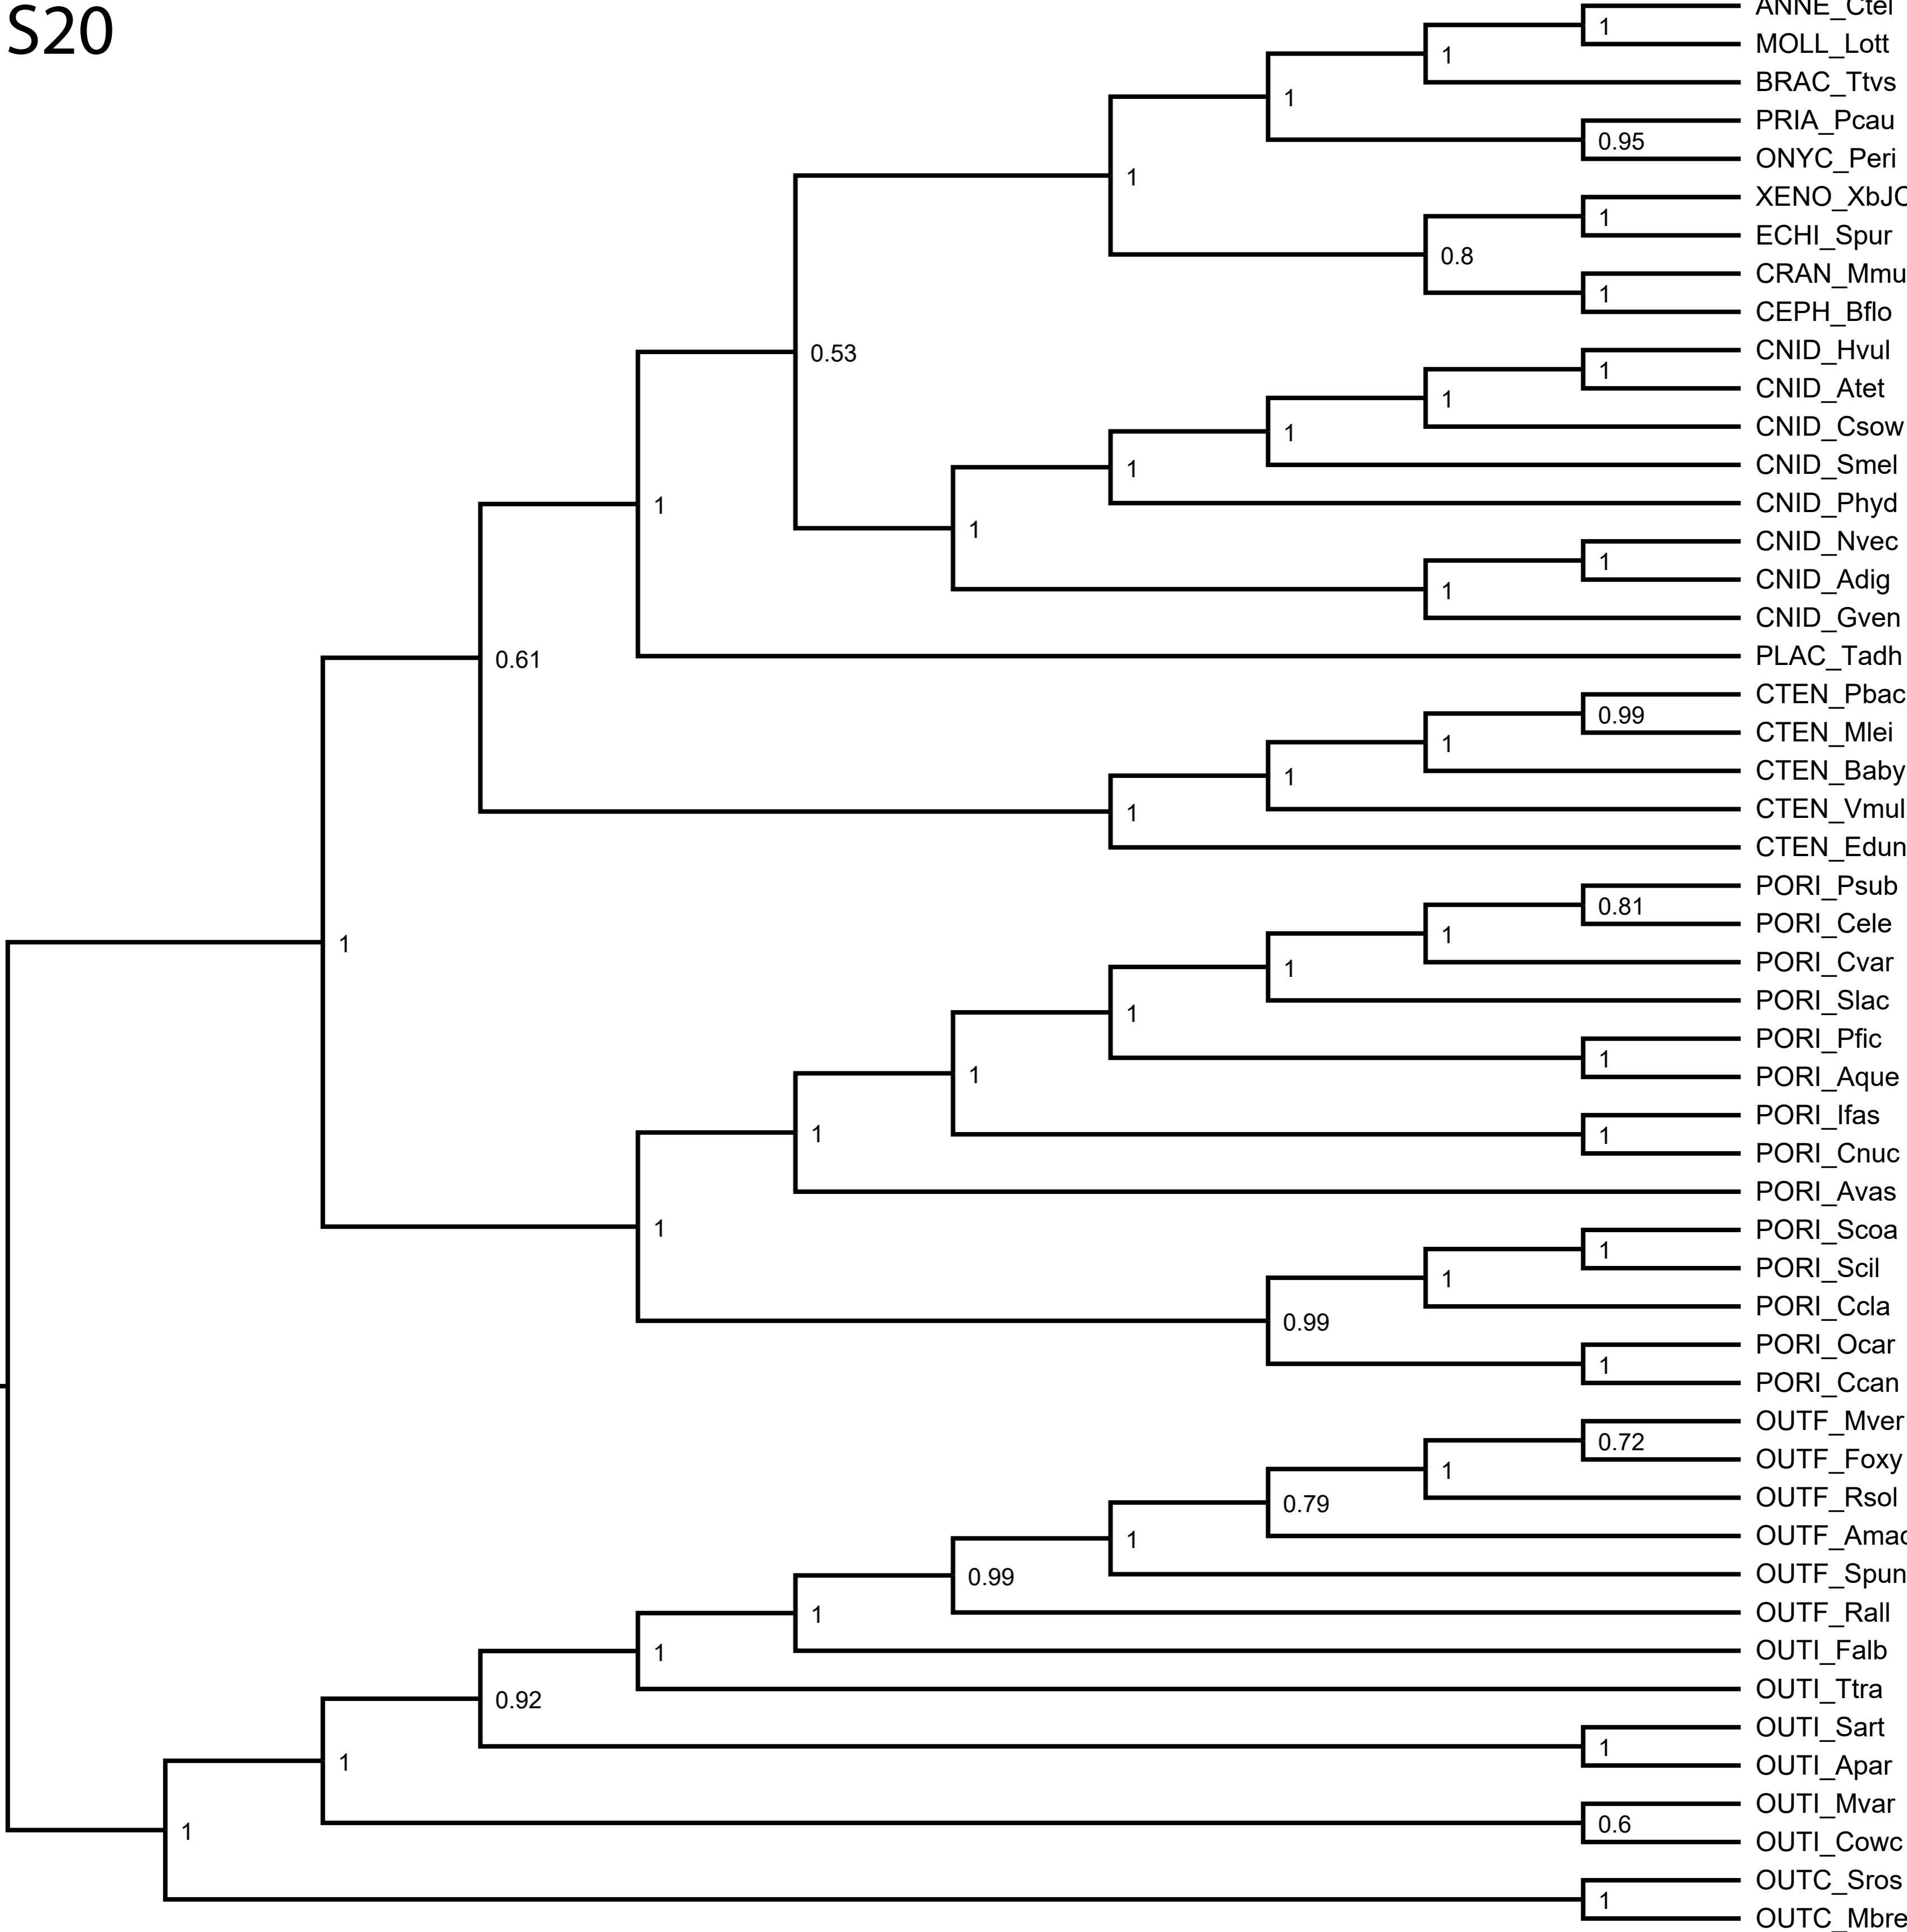

S21

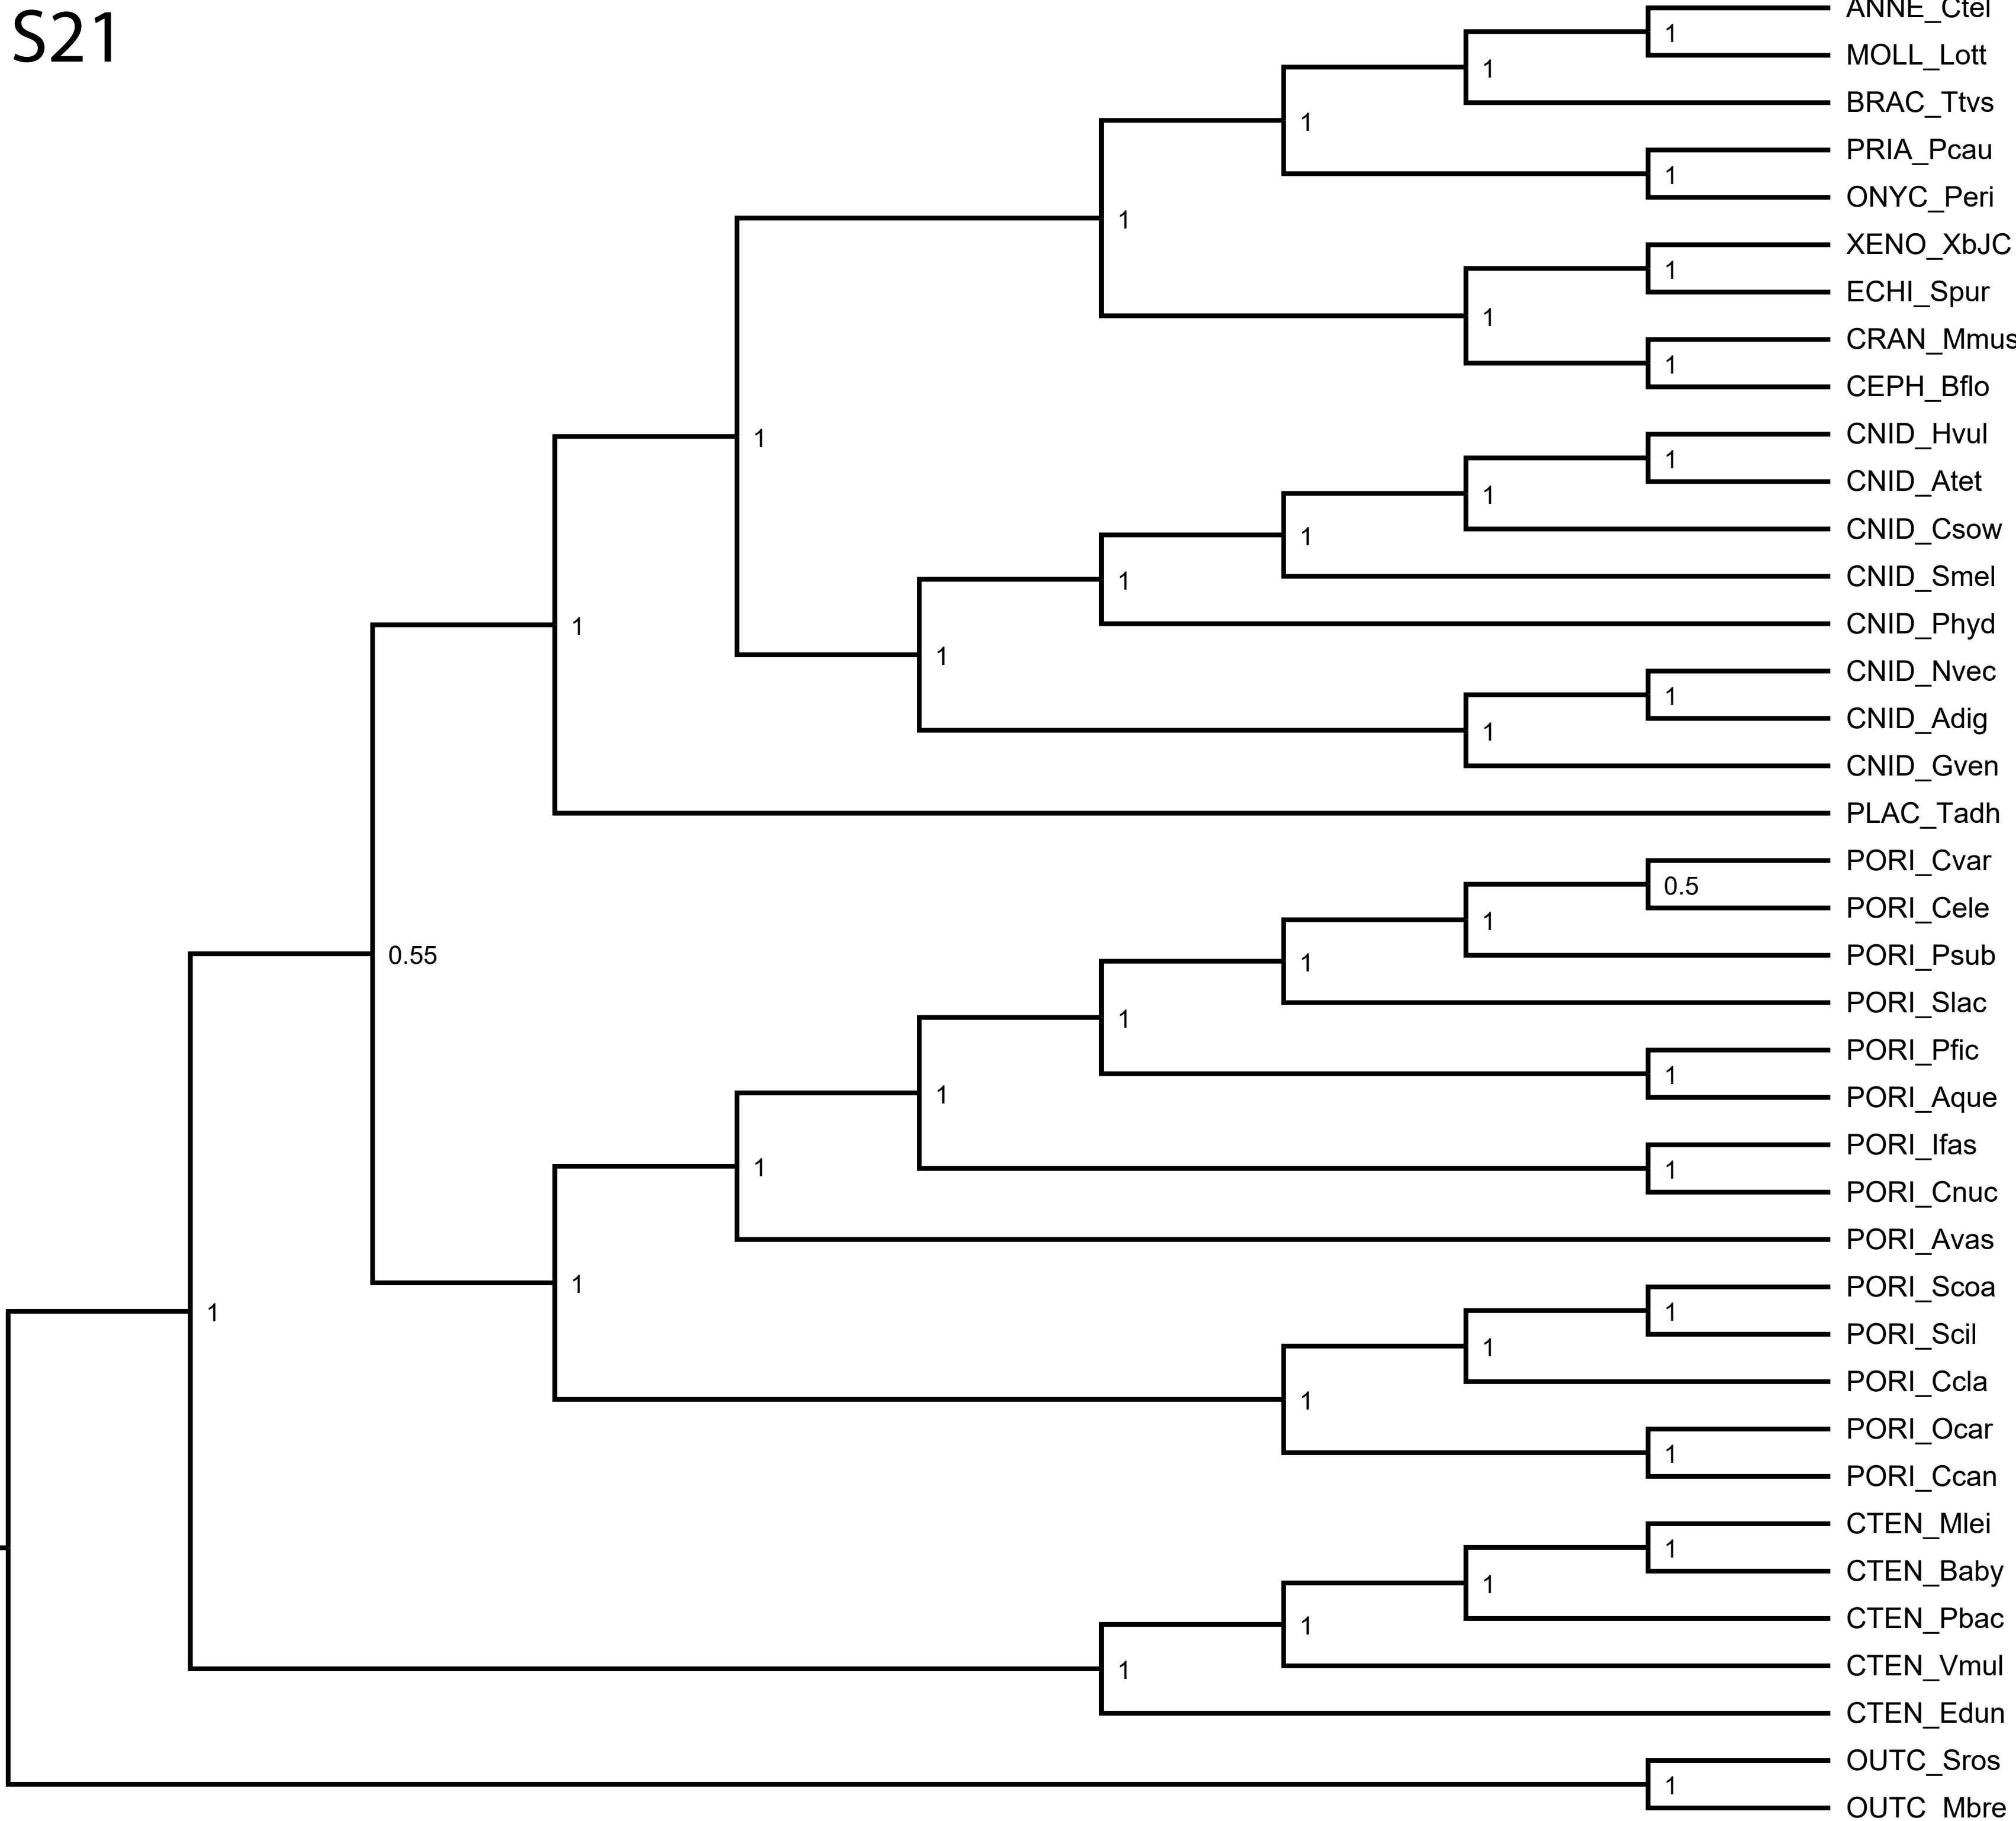

0.4



S22

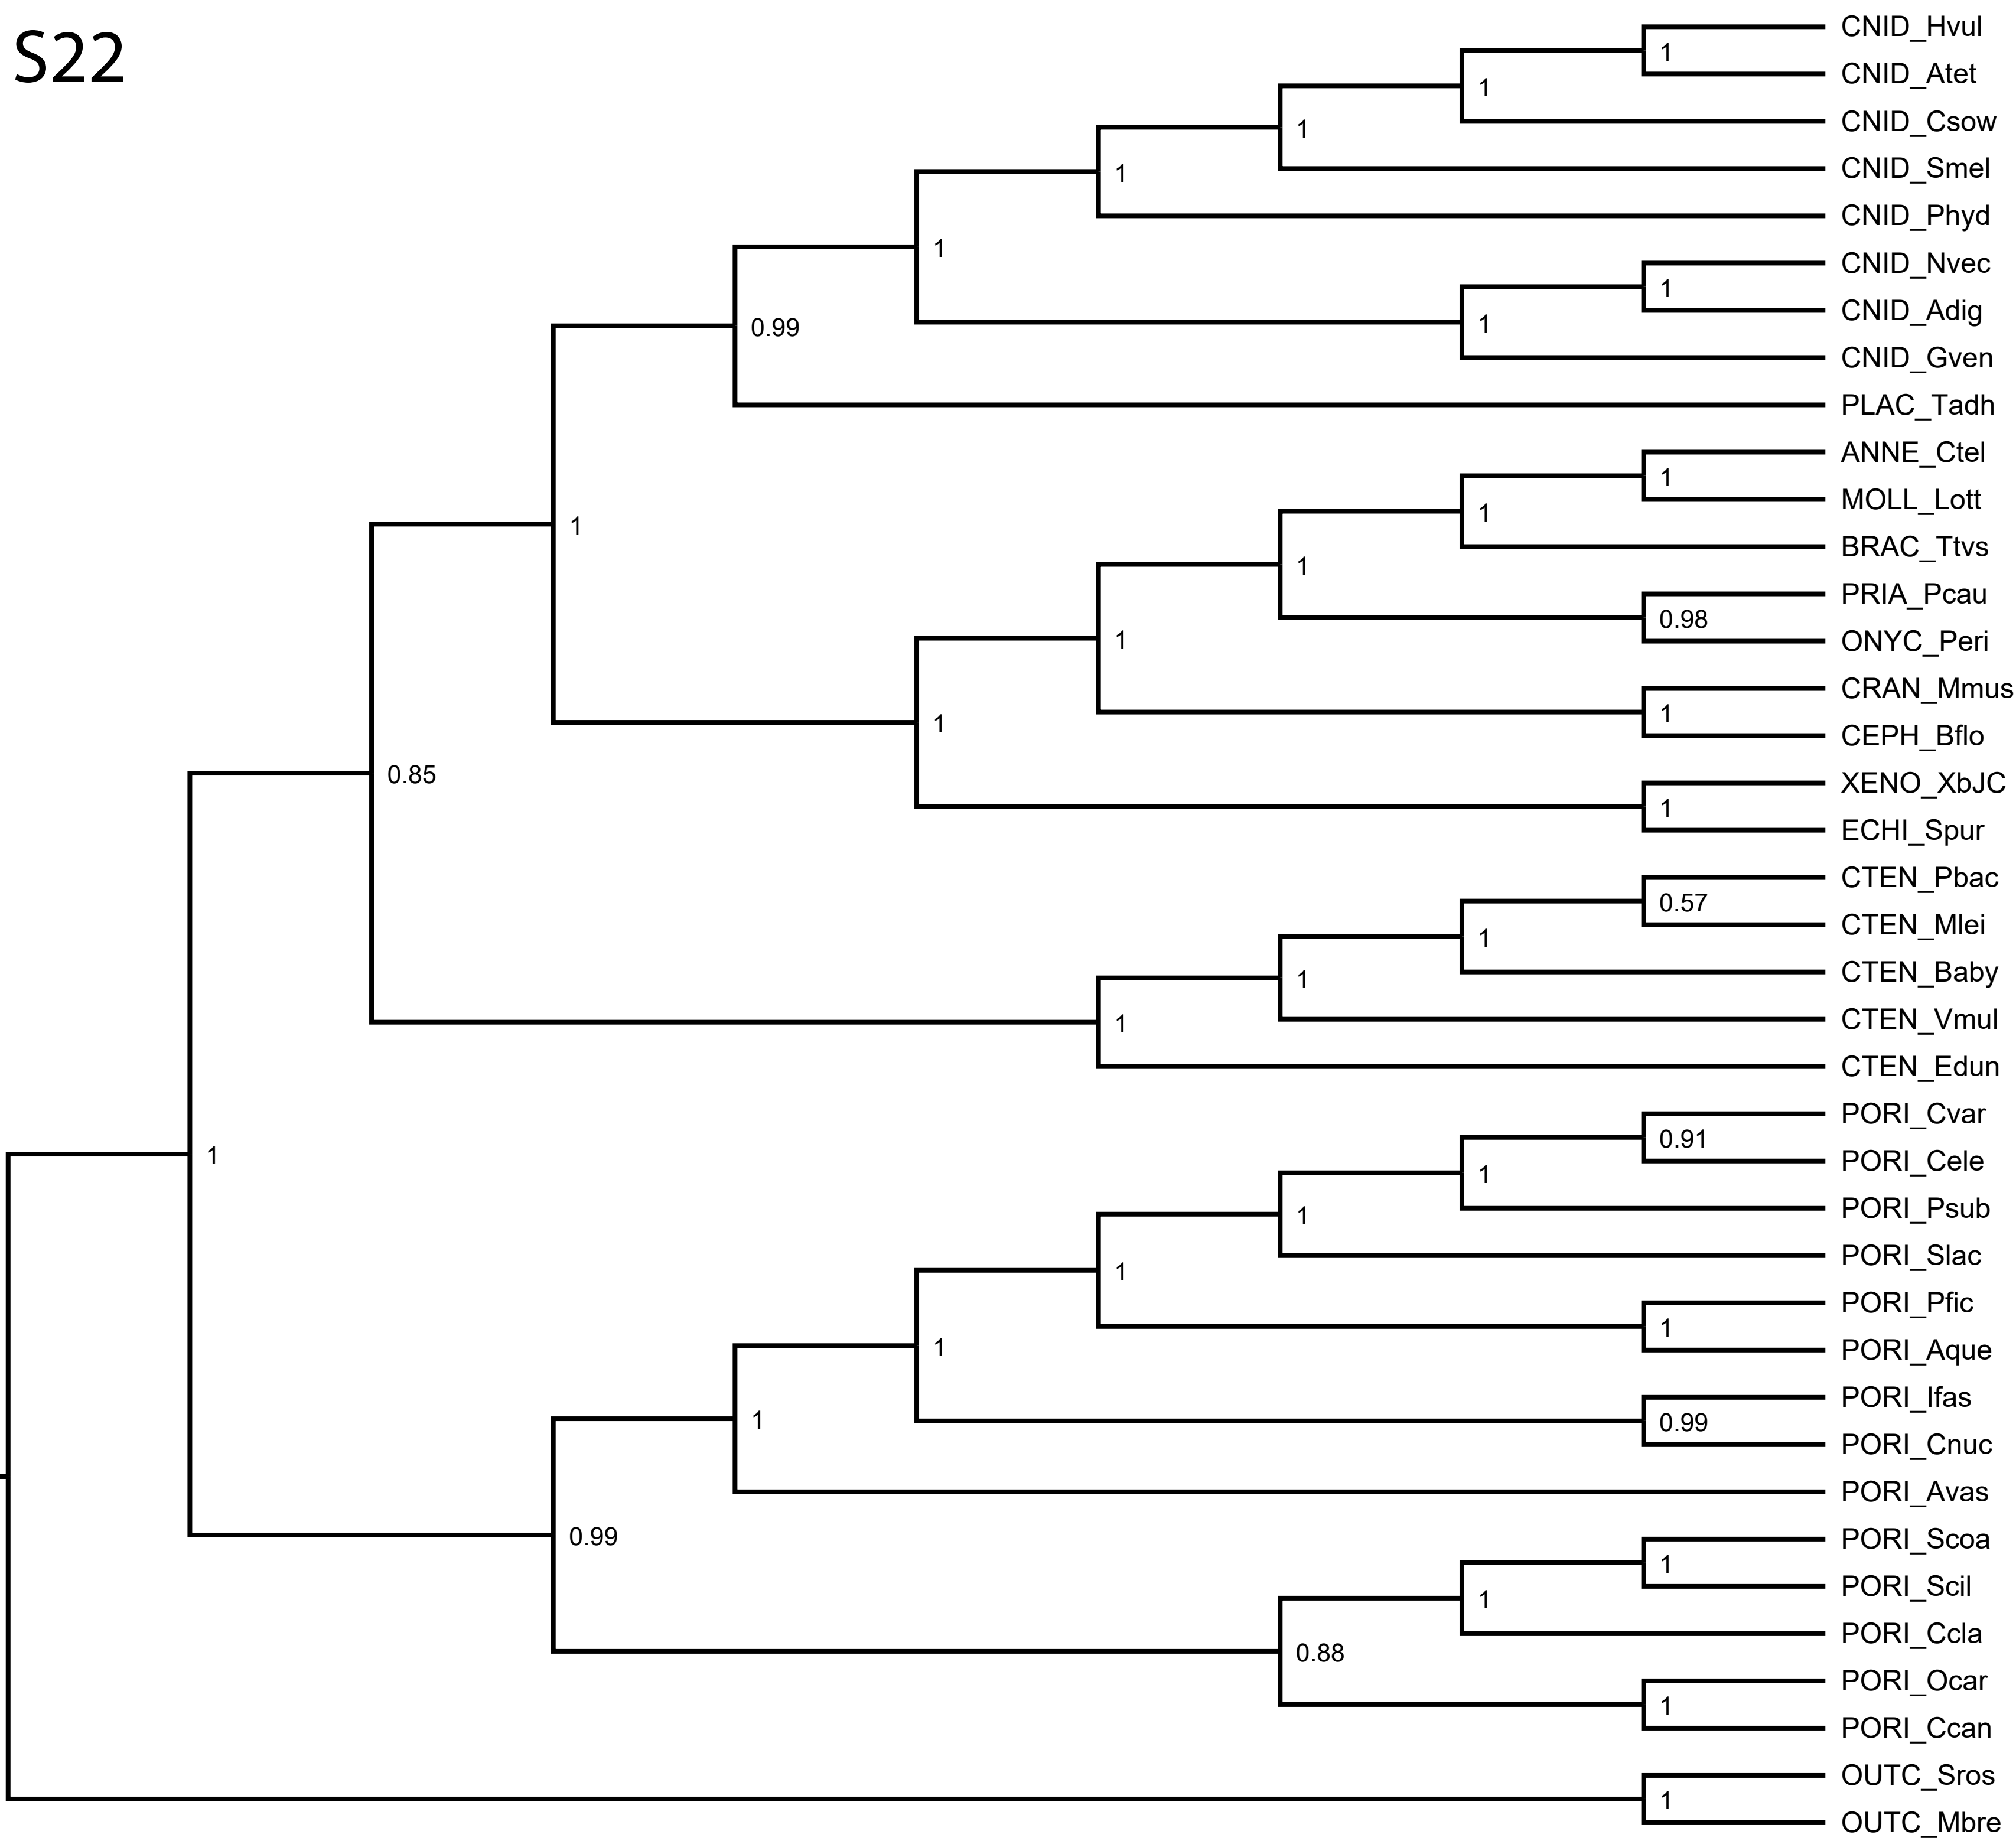

S23

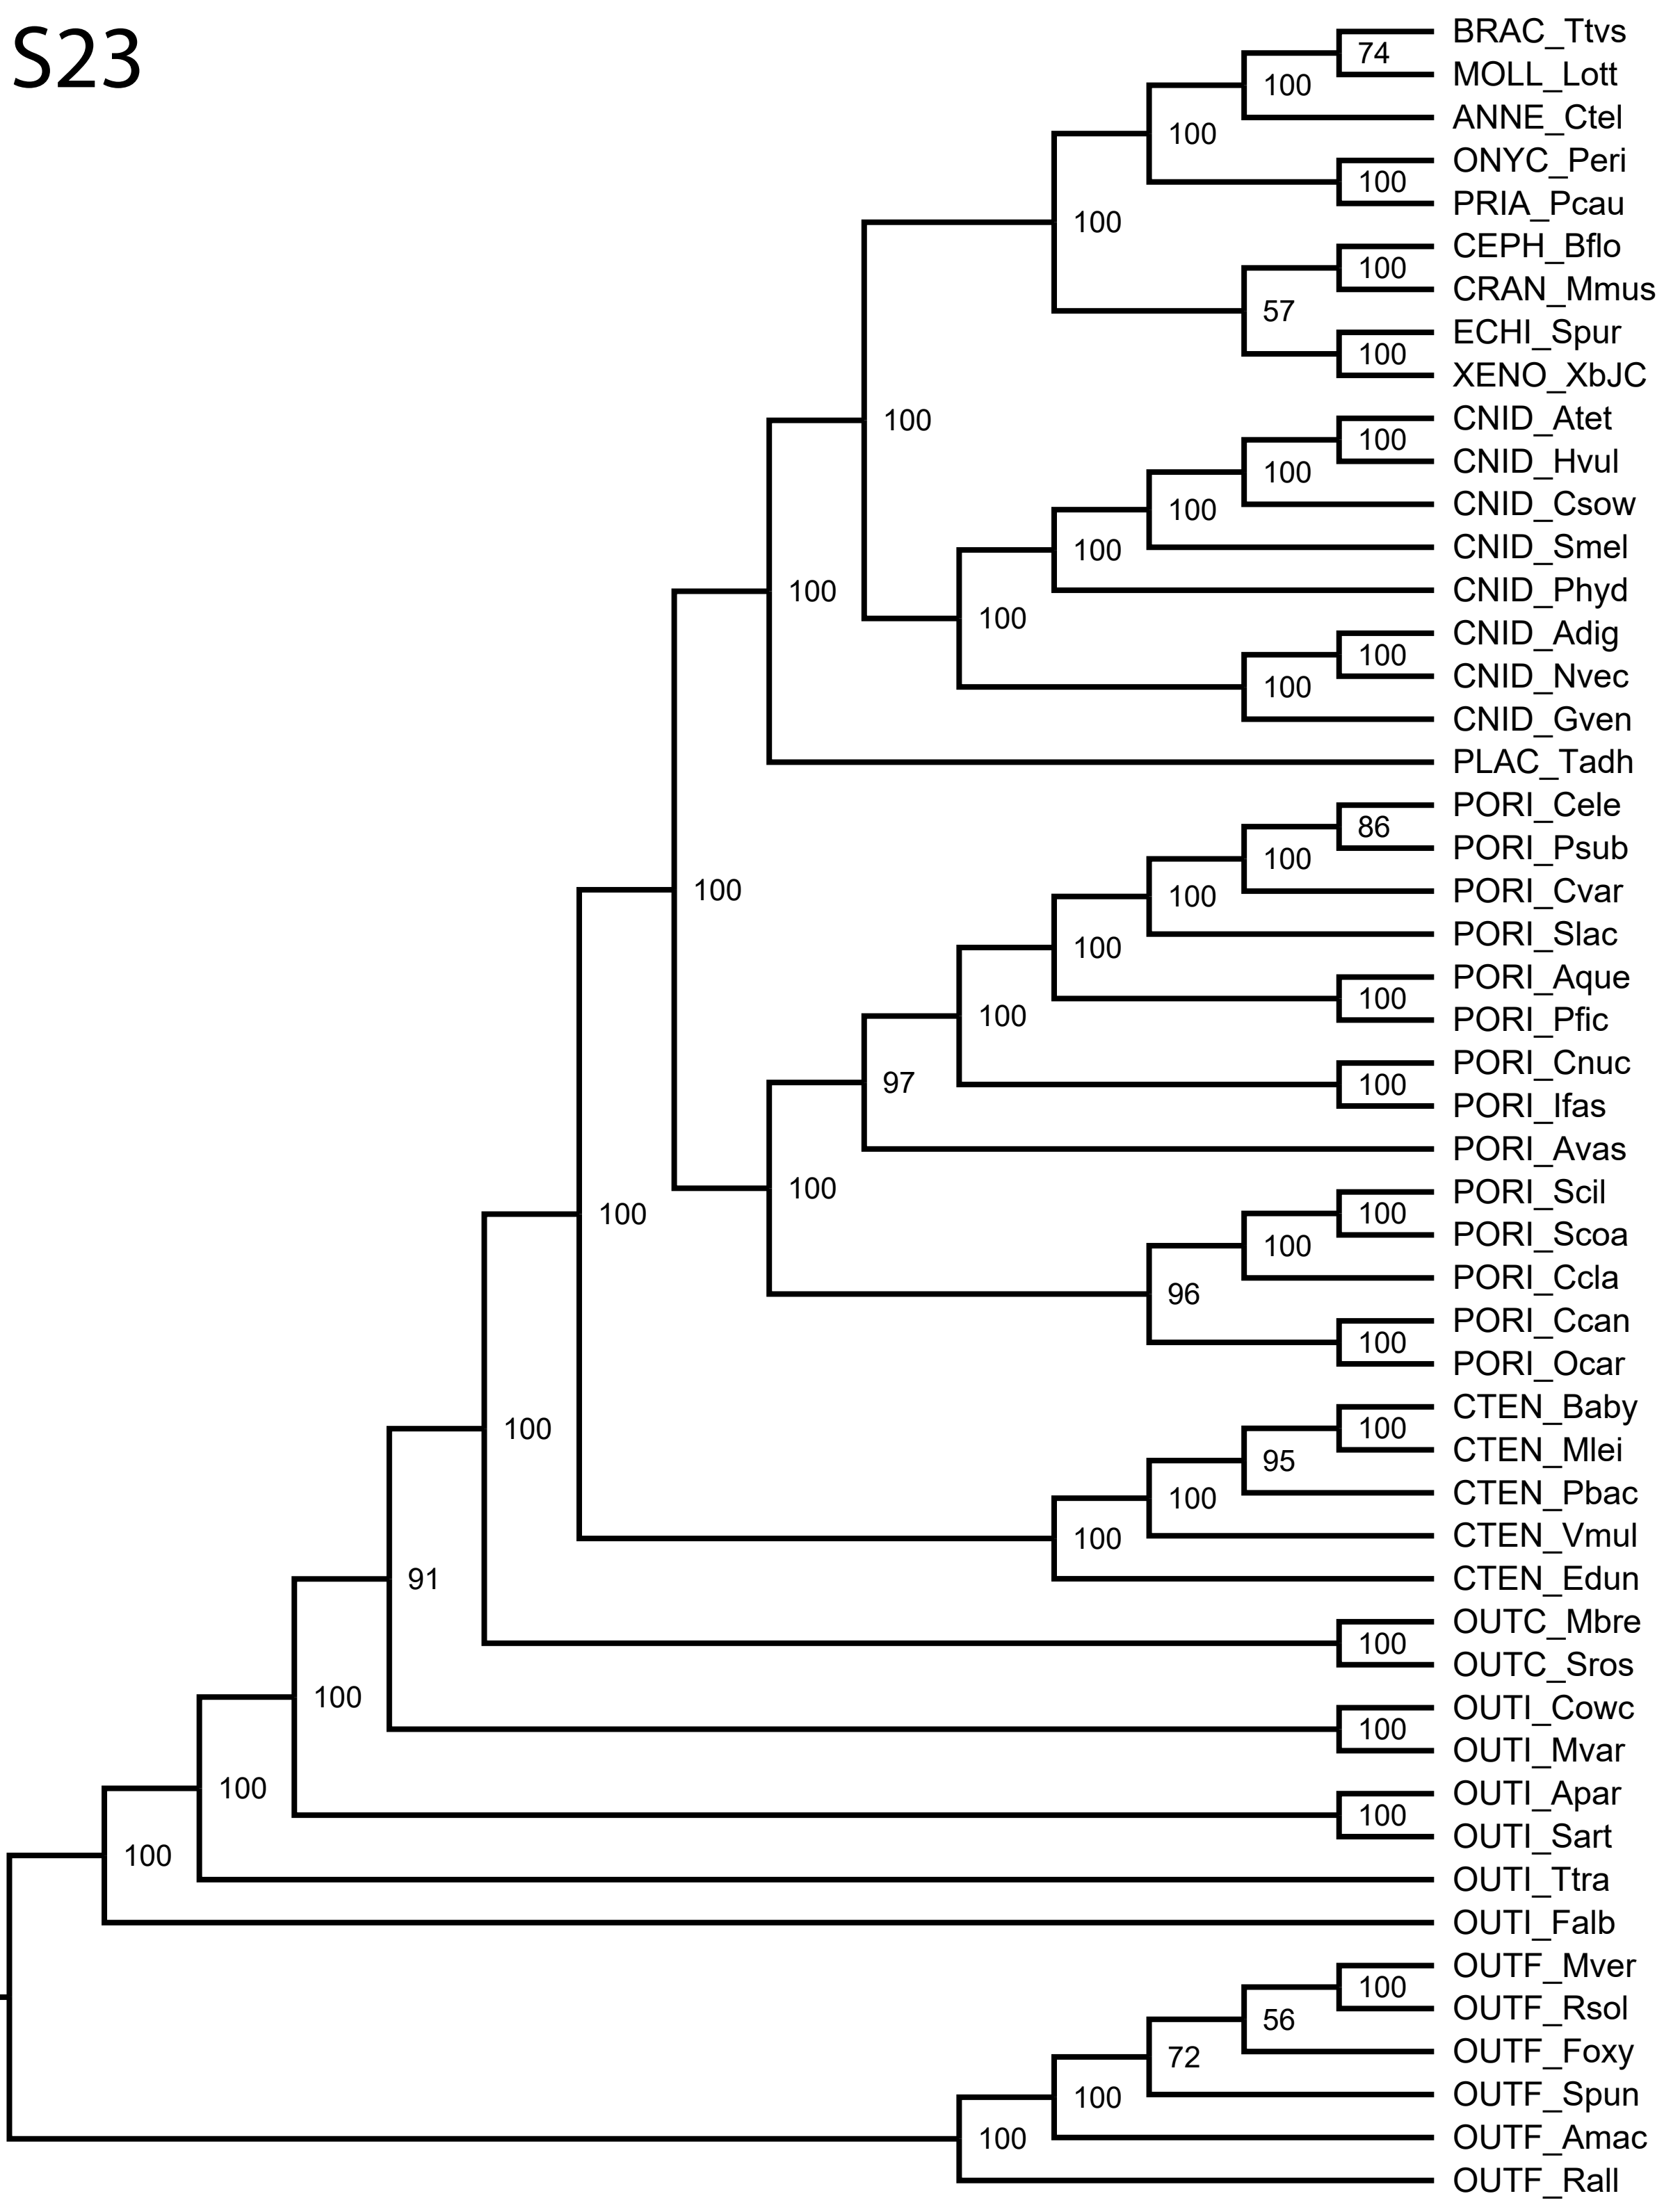

# S24

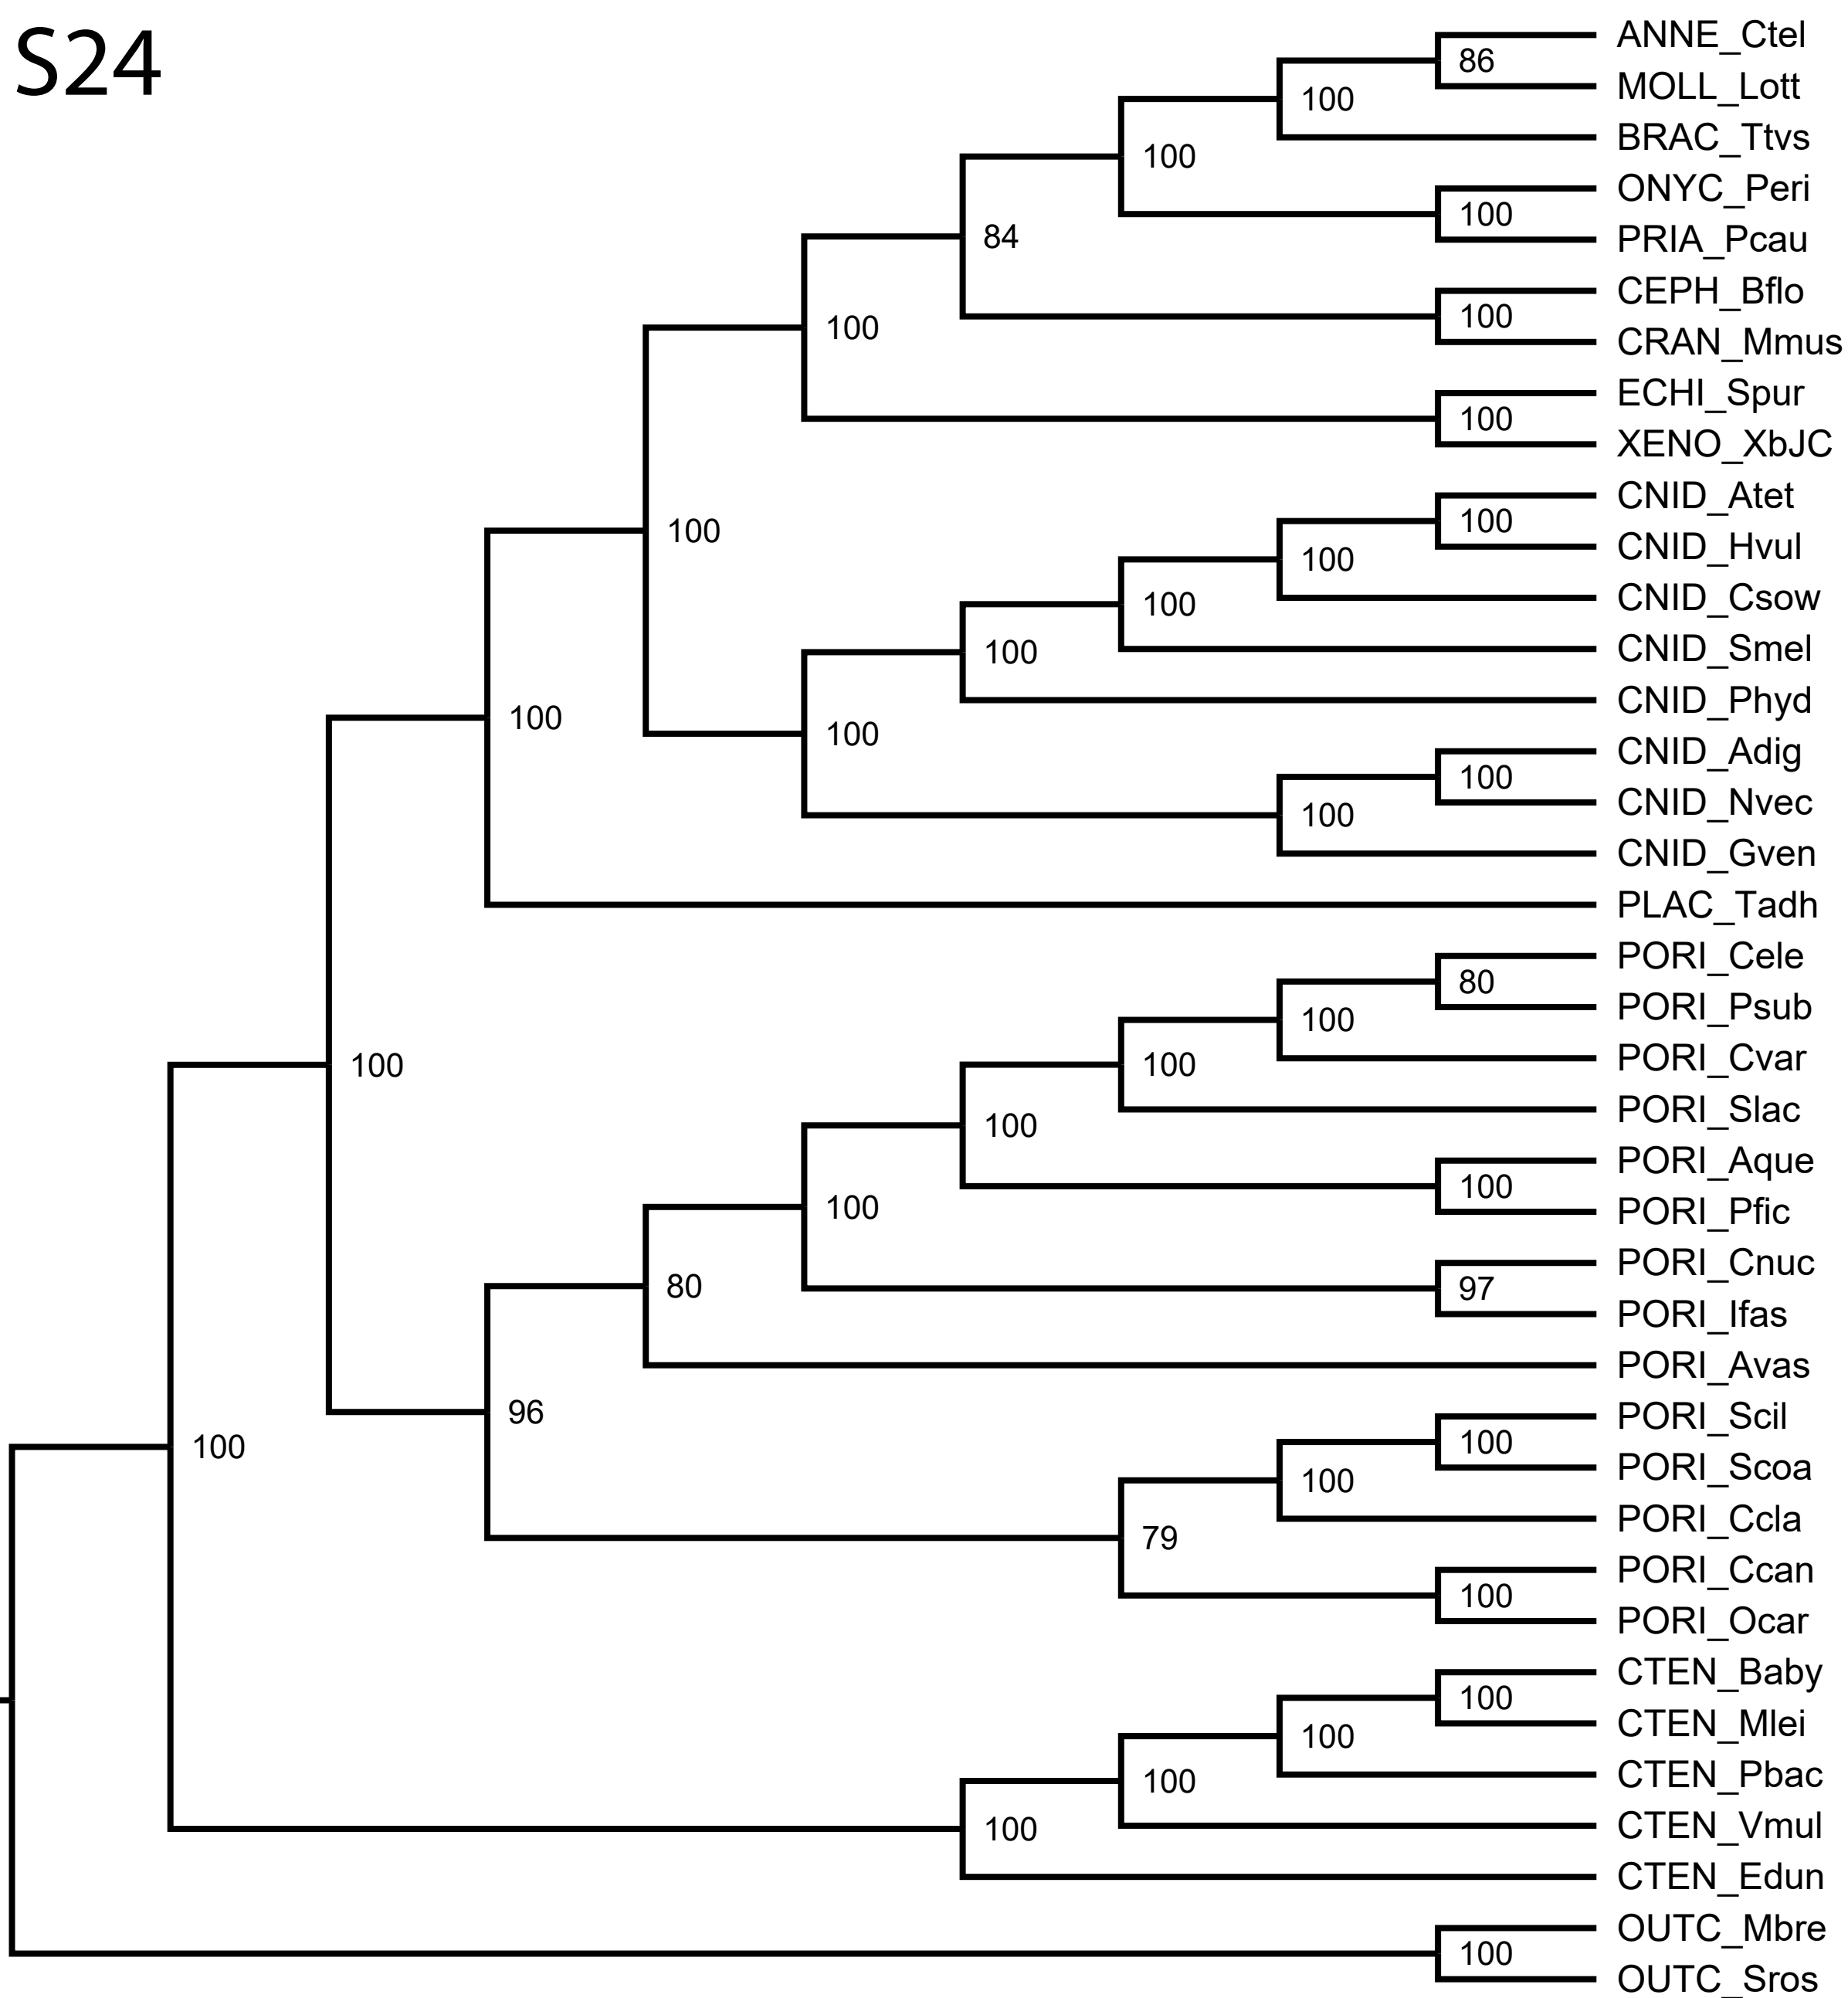

|                        |                                  |                   |                                 |                                                                                                                                   |
|------------------------|----------------------------------|-------------------|---------------------------------|-----------------------------------------------------------------------------------------------------------------------------------|
| <b>NON-BILATERIA</b>   |                                  |                   |                                 |                                                                                                                                   |
| Ctenophora [5]         | Beroe abyssicola                 | CTEN_Baby         | Transcriptome (Illumina)        | SRR777787                                                                                                                         |
|                        | Euplokamis dunlapae              | CTEN_Edun         | Transcriptome (Illumina)        | SRR777663                                                                                                                         |
|                        | Mnemiopsis leidyi                | CTEN_Mlei         | Genome                          | PRJNA64405                                                                                                                        |
|                        | Pleurobrachia bachei             | CTEN_Pbac         | Genome                          | PRJNA213480                                                                                                                       |
|                        | Vallicula multiformis            | CTEN_Vmul         | Transcriptome (Illumina)        | SRR786489                                                                                                                         |
| Porifera [14]          | Amphimedon queenslandica         | PORI_Aque         | Genome                          | PRJNA66531                                                                                                                        |
|                        | Aphrocallistes vastus            | PORI_Avas†        | Transcriptome (Illumina)        | SRR1068281                                                                                                                        |
|                        | Chondrilla caribensis            | PORI_Cnuc         | Transcriptome (Illumina)        | <a href="https://dataverse.harvard.edu/dataverse/spotranscriptomes">https://dataverse.harvard.edu/dataverse/spotranscriptomes</a> |
|                        | Clathrina coriacea               | PORI_Ccla†        | Transcriptome (Illumina)        | SRR3417192                                                                                                                        |
|                        | Cliona varians                   | PORI_Cvar         | Transcriptome (Illumina)        | SRR1391011                                                                                                                        |
|                        | Corticium candelabrum            | PORI_Ccan         | Transcriptome (Illumina)        | SRR504694                                                                                                                         |
|                        | Crella elegans                   | PORI_Cele         | Transcriptome (Illumina)        | SRR648671                                                                                                                         |
|                        | Ircinia fasciculata              | PORI_Ifas         | Transcriptome (Illumina)        | <a href="https://dataverse.harvard.edu/dataverse/spotranscriptomes">https://dataverse.harvard.edu/dataverse/spotranscriptomes</a> |
|                        | Oscarella carmela                | PORI_Ocar         | Genome                          | SRX386229                                                                                                                         |
|                        | Petrosia ficiformis              | PORI_Pfic         | Transcriptome (Illumina)        | SRR504688                                                                                                                         |
|                        | Pseudospongosorites suberitoides | PORI_Psub         | Transcriptome (Illumina)        | <a href="https://dataverse.harvard.edu/dataverse/spotranscriptomes">https://dataverse.harvard.edu/dataverse/spotranscriptomes</a> |
|                        | Spongilla lacustris              | PORI_Slac         | Transcriptome (Illumina)        | SRR1168575                                                                                                                        |
|                        | Sycon ciliatum                   | PORI_Scil         | Transcriptome (Illumina)        | ERR466762                                                                                                                         |
|                        | Sycon coactum                    | PORI_Scoa         | Transcriptome (Illumina)        | SRR504689,SRR504690                                                                                                               |
| Placozoa [1]           | Trichoplax adhaerens             | PLAC_Tadh         | Genome                          | PRJNA12874                                                                                                                        |
| Cnidaria [8]           | Abylopsis tetragona              | CNID_Atet         | Transcriptome (Illumina)        | SRR871525                                                                                                                         |
|                        | Acropora digitifera              | CNID_Adig         | Genome                          | PRJDA67425                                                                                                                        |
|                        | Craspedacusta sowerbyi           | CNID_Csow         | Transcriptome (Illumina)        | SRR923472                                                                                                                         |
|                        | Gorgonia ventalina               | CNID_Gven         | Transcriptome (Illumina)        | SRR935083                                                                                                                         |
|                        | Hydra vulgaris                   | CNID_Hvul         | Genome                          | PRJNA31231                                                                                                                        |
|                        | Nematostella vectensis           | CNID_Nvec         | Genome                          | PRJNA19965                                                                                                                        |
|                        | Polypodium hydriforme            | CNID_Phyd         | Transcriptome (Illumina)        | SRR1336770                                                                                                                        |
|                        | Stomolophus meleagris            | CNID_Smel         | Transcriptome (Illumina)        | SRR1168418                                                                                                                        |
| <b>XENACOELOMORPHA</b> |                                  |                   |                                 |                                                                                                                                   |
| Acoelomorpha [8]       | Convolutriloba macropyga         | ACOE_Conv         | Transcriptome (Illumina)        | SRR2681679                                                                                                                        |
|                        | Diopisthoporus longitubus        | ACOE_Diol         | Transcriptome (Illumina)        | SRR3105704                                                                                                                        |
|                        | Diopisthoporus gymnopharyngeus   | ACOE_Diop         | Transcriptome (Illumina)        | SRR3105703                                                                                                                        |
|                        | Eumecynostomum macrobursalium    | ACOE_Eumc†        | Transcriptome (Illumina)        | SRR3105705                                                                                                                        |
|                        | Hofstenia miamia                 | ACOE_Hmia         | Transcriptome (Illumina)        | SRR1208932                                                                                                                        |
|                        | Isodiametra pulchra              | ACOE_Isop         | Transcriptome (Illumina)        | SRR2681926                                                                                                                        |
|                        | <b>Neochildia fusca</b>          | <b>ACOE_Nfus</b>  | <b>Transcriptome (Illumina)</b> | <b>SRR8617822</b>                                                                                                                 |
|                        | Symsagittifera roscoffensis      | ACOE_Sros         | Transcriptome (Illumina)        | SRR827579                                                                                                                         |
| Nemertodermatida [4]   | Ascoparia sp. BV-2015            | NEMO_Asco         | Transcriptome (Illumina)        | SRR2682154                                                                                                                        |
|                        | <b>Flagellophora sp. Bocas</b>   | <b>NEMO_Flag†</b> | <b>Transcriptome (Illumina)</b> | <b>SRR8641368</b>                                                                                                                 |
|                        | Meara stichopi                   | NEMO_Mers         | Transcriptome (Illumina)        | SRR2681155                                                                                                                        |
|                        | Nemertoderma westbladi           | NEMO_Nemw         | Transcriptome (Illumina)        | SRR2682004                                                                                                                        |
| Xenoturbellida [1]     | <b>Xenoturbella bocki</b>        | <b>XENO_Xboc†</b> | <b>Transcriptome (Illumina)</b> | <b>SRR8638116</b>                                                                                                                 |
|                        | Xenoturbella bocki               | XENO_XbJC         | Transcriptome (Illumina)        | SRR2681987                                                                                                                        |
| <b>DEUTEROSTOMIA</b>   |                                  |                   |                                 |                                                                                                                                   |
| Echinodermata [11]     | Apostichopus japonicus           | ECHI_Ajap         | Transcriptome (Illumina)        | SRR1185973                                                                                                                        |
|                        | Echinaster spinulosus            | ECHI_Espi         | Transcriptome (Illumina)        | SRR1139455                                                                                                                        |

|                     |                                         |                   |                                 |                                                                                                                                 |
|---------------------|-----------------------------------------|-------------------|---------------------------------|---------------------------------------------------------------------------------------------------------------------------------|
|                     | <i>Eucidaris tribuloides</i>            | ECHI_Etri         | Transcriptome (Illumina)        | SRR1138704                                                                                                                      |
|                     | <i>Holothuria glaberrima</i>            | ECHI_Hgla         | Transcriptome (Illumina)        | SRR490924                                                                                                                       |
|                     | <i>Lytechinus variegatus</i>            | ECHI_Lvar         | Genome                          | SRX056025                                                                                                                       |
|                     | <i>Ophiocoma echinata</i>               | ECHI_Oech         | Transcriptome (Illumina)        | SRR1138707                                                                                                                      |
|                     | <i>Ophioderma longicauda</i>            | ECHI_Olon         | Transcriptome (Illumina)        | SRR1325052                                                                                                                      |
|                     | <i>Oxycomanthus japonicus</i>           | ECHI_Ojap         | Transcriptome (Illumina)        | SRR1138706                                                                                                                      |
|                     | <i>Patiria miniata</i>                  | ECHI_Pmin         | Genome                          | SRX096949                                                                                                                       |
|                     | <i>Sclerodactyla briareus</i>           | ECHI_Sbria        | Transcriptome (Illumina)        | SRR1139189                                                                                                                      |
|                     | <i>Strongylocentrotus purpuratus</i>    | ECHI_Spur         | Genome                          | SRX130692                                                                                                                       |
| Hemichordata [5]    | <i>Cephalodiscus gracilis</i>           | HEMI_Cgra         | Transcriptome (Illumina)        | SRR1695473                                                                                                                      |
|                     | <i>Ptychodera bahamensis</i>            | HEMI_Pbah         | Transcriptome (Illumina)        | SRR1695458                                                                                                                      |
|                     | <i>Saccoglossus kowalevskii</i>         | HEMI_Skow         | Genome                          | GCA_000003605.1                                                                                                                 |
|                     | <i>Schizocardium cf. braziliense</i>    | HEMI_Sbra         | Transcriptome (Illumina)        | SRR1695467                                                                                                                      |
|                     | <i>Torquaratoridae sp. Antarctica</i>   | HEMI_Tbah         | Transcriptome (Illumina)        | SRR1695469                                                                                                                      |
| Cephalochordata [2] | <i>Asymmetron lucayanum</i>             | CEPH_Aluc         | Transcriptome                   | SRR1138336                                                                                                                      |
|                     | <i>Branchiostoma floridae</i>           | CEPH_Bflo         | Genome                          | PRJNA33245                                                                                                                      |
| Urochordata [2]     | <i>Ciona intestinalis</i>               | UROC_Cint         | Genome                          | PRJNA187185                                                                                                                     |
|                     | <i>Oikopleura dioica</i>                | UROC_Odio†        | Genome                          | ASM20953v1                                                                                                                      |
| Craniata [7]        | <i>Callorhincus milii</i>               | CRAN_Cmil         | Transcriptome (Illumina)        | SRR514104                                                                                                                       |
|                     | <i>Danio rerio</i>                      | CRAN_Drer         | Genome                          | PRJNA13922                                                                                                                      |
|                     | <i>Gallus gallus</i>                    | CRAN_Ggal         | Genome                          | PRJNA10808                                                                                                                      |
|                     | <i>Homo sapiens</i>                     | CRAN_Hsap         | Genome                          | PRJNA178030                                                                                                                     |
|                     | <i>Latimera chalumnae</i>               | CRAN_Lcha         | Genome                          | GCA_000225785.1                                                                                                                 |
|                     | <i>Mus musculus</i>                     | CRAN_Mmus         | Genome                          | PRJNA169                                                                                                                        |
|                     | <i>Petromyzon marinus</i>               | CRAN_Pmar         | Genome                          | GCA_000148955.1                                                                                                                 |
| <b>SPIRALIA</b>     |                                         |                   |                                 |                                                                                                                                 |
| Chaetognatha [2]    | <b><i>Sagitta elegans</i></b>           | <b>CHAE_Selg</b>  | <b>Transcriptome (Illumina)</b> | <b>SRR8627919</b>                                                                                                               |
|                     | <b><i>Spadella sp.</i></b>              | <b>CHAE_Spdl</b>  | <b>Transcriptome (Illumina)</b> | <b>PRJNA531448</b>                                                                                                              |
| Bryozoa [4]         | <b><i>Bugula stolonifera</i></b>        | <b>BRYO_Bstl</b>  | <b>Transcriptome (Illumina)</b> | <b>PRJNA531447</b>                                                                                                              |
|                     | <b><i>Flustrellidra corniculata</i></b> | <b>BRYO_Fcor</b>  | <b>Transcriptome (Illumina)</b> | <b>PRJNA531442</b>                                                                                                              |
|                     | <b><i>Heteropora pacifica</i></b>       | <b>BRYO_Hpac</b>  | <b>Transcriptome (Illumina)</b> | <b>PRJNA531441</b>                                                                                                              |
|                     | <i>Membranipora membranacea</i>         | BRYO_Mmem         | Transcriptome (Illumina)        | SRR2131259                                                                                                                      |
| Entoprocta [4]      | <i>Barentsia gracilis</i>               | ENTO_Bgra         | Transcriptome (Illumina)        | SRR1611554                                                                                                                      |
|                     | <b><i>Loxomitra sp.</i></b>             | <b>ENTO_Lxmt†</b> | <b>Transcriptome (Illumina)</b> | <b>PRJNA531440</b>                                                                                                              |
|                     | <i>Loxosoma pectinaricola</i>           | ENTO_Loxp         | Transcriptome (Illumina)        | SRR1611559                                                                                                                      |
|                     | <b><i>Pedicellina sp. FHL</i></b>       | <b>ENTO_PclF†</b> | <b>Transcriptome (Illumina)</b> | <b>PRJNA531438</b>                                                                                                              |
| Cycliophora [1]     | <b><i>Symbion cf. americanus</i></b>    | <b>CYCL_Symb</b>  | <b>Transcriptome (Illumina)</b> | <b>PRJNA531426</b>                                                                                                              |
|                     | <i>Symbion pandora</i>                  | CYCL_SyRN‡        | Transcriptome (Illumina)        | SRR3102772                                                                                                                      |
| Annelida [16]       | <i>Capitella teleta</i>                 | ANNE_Ctel         | Genome                          | <a href="https://metazoa.ensembl.org/Capitella_teleta/Info/Index">https://metazoa.ensembl.org/Capitella_teleta/Info/Index</a>   |
|                     | <i>Diurodrilus subterraneus</i>         | ANNE_Diur†        | Transcriptome (Illumina)        | SRR2131612                                                                                                                      |
|                     | <i>Helobdella robusta</i>               | ANNE_Hrob         | Genome                          | <a href="http://metazoa.ensembl.org/Helobdella_robusta/Info/Index">http://metazoa.ensembl.org/Helobdella_robusta/Info/Index</a> |
|                     | <i>Lobatocerebrum sp.</i>               | ANNE_Loba†        | Transcriptome (Illumina)        | SRR2131397                                                                                                                      |
|                     | <i>Lumbricus rubellus</i>               | ANNE_Lrub         | Transcriptome (Illumina)        | SRR923752                                                                                                                       |
|                     | <i>Magelona johnstoni</i>               | ANNE_Mjoh         | Transcriptome (Illumina)        | SRR1222290                                                                                                                      |
|                     | <i>Marphysa bellii</i>                  | ANNE_Mbel         | Transcriptome (Illumina)        | SRR1232821,SRR1232833                                                                                                           |
|                     | <i>Myzostoma seymourcollegiorum</i>     | ANNE_Myzo†        | Transcriptome (Illumina)        | SRR2005822                                                                                                                      |
|                     | <i>Nephtys caeca</i>                    | ANNE_Ncae         | Transcriptome (Illumina)        | SRR1232685,SRR1232795                                                                                                           |

|                      |                                                       |             |                          |                                                                                                                               |
|----------------------|-------------------------------------------------------|-------------|--------------------------|-------------------------------------------------------------------------------------------------------------------------------|
|                      | <i>Owenia fusiformis</i>                              | ANNE_Ofust† | Transcriptome (Illumina) | SRR1222288                                                                                                                    |
|                      | <i>Paramphinoe jeffreysii</i>                         | ANNE_Pamp   | Transcriptome (Illumina) | SRR1257731,SRR1257732                                                                                                         |
|                      | <i>Phascolopsis gouldii</i>                           | ANNE_Plcs   | Transcriptome (Illumina) | SRR1654498                                                                                                                    |
|                      | <i>Phyllochaetopterus</i> sp.                         | ANNE_Phyl   | Transcriptome (Illumina) | SRR1257898,SRR1257899                                                                                                         |
|                      | <i>Phylo foetida</i>                                  | ANNE_Pfoe   | Transcriptome (Illumina) | SRR1222216                                                                                                                    |
|                      | <i>Scolecopsis squamata</i>                           | ANNE_Ssqu‡  | Transcriptome (Illumina) | SRR1222145                                                                                                                    |
|                      | <i>Siphonosoma cumanense</i>                          | ANNE_Spsm†  | Transcriptome (Illumina) | SRR1646441                                                                                                                    |
| Mollusca [14]        | <i>Chiton olivaceus</i>                               | MOLL_Cton   | Transcriptome (Illumina) | SRX205322                                                                                                                     |
|                      | <i>Crassostrea gigas</i>                              | MOLL_Cgig   | Genome                   | <a href="http://metazoa.ensembl.org/Crassostrea_gigas/Info/Index">http://metazoa.ensembl.org/Crassostrea_gigas/Info/Index</a> |
|                      | <i>Hydatina physis</i>                                | MOLL_Hphy   | Transcriptome (Illumina) | SRR1505113                                                                                                                    |
|                      | <i>Laevipilina hyalina</i>                            | MOLL_Lvpl   | Transcriptome (Illumina) | SRX644679                                                                                                                     |
|                      | <i>Leptochiton rugatus</i>                            | MOLL_Lrug   | Transcriptome (Illumina) | SRR1611558                                                                                                                    |
|                      | <i>Lottia gigantea</i>                                | MOLL_Lott   | Genome                   | <a href="http://metazoa.ensembl.org/Lottia_gigantea/Info/Index">http://metazoa.ensembl.org/Lottia_gigantea/Info/Index</a>     |
|                      | <i>Monodonta labio</i>                                | MOLL_Mlab   | Transcriptome (Illumina) | SRR1505119                                                                                                                    |
|                      | <i>Nautilus pompilius</i>                             | MOLL_Nomp   | Transcriptome (Illumina) | SRR5626553                                                                                                                    |
|                      | <i>Neomenia</i> sp.                                   | MOLL_Nmna   | Transcriptome (Illumina) | SRX092155                                                                                                                     |
|                      | <i>Octopus vulgaris</i>                               | MOLL_Ovul   | Transcriptome (Illumina) | SRX092193                                                                                                                     |
|                      | <i>Pholidoskepia</i> sp. [formerly <i>Chaetoder</i> ] | MOLL_Phol   | Transcriptome (Illumina) | SRR1505105                                                                                                                    |
|                      | <i>Proneomenia custodiens</i>                         | MOLL_Pcus   | Transcriptome (Illumina) | SRR1611561                                                                                                                    |
|                      | <i>Solemya velum</i>                                  | MOLL_Svel   | Transcriptome (Illumina) | SRR330465                                                                                                                     |
| Nemertea [5]         | <i>Argonemertes australiensis</i>                     | NEME_Aaus   | Transcriptome (Illumina) | SRX646169                                                                                                                     |
|                      | <i>Baseodiscus unicolor</i>                           | NEME_Buni   | Transcriptome (Illumina) | SRX644738                                                                                                                     |
|                      | <i>Carinoma hamanako</i>                              | NEME_Cham   | Transcriptome (Illumina) | SRX643224                                                                                                                     |
|                      | <i>Hubrechtella ijimai</i>                            | NEME_Hiji   | Transcriptome (Illumina) | SRX644663                                                                                                                     |
|                      | <i>Protopelagonemertes beebeyi</i>                    | NEME_Peeb   | Transcriptome (Illumina) | SRX646186                                                                                                                     |
| Brachiopoda [7]      | <i>Glottidia pyramidata</i>                           | BRAC_Gpyr   | Transcriptome (Illumina) | SRR1611555                                                                                                                    |
|                      | <i>Hemithiris psittacea</i>                           | BRAC_Hpst   | Transcriptome (Illumina) | SRR1611556                                                                                                                    |
|                      | <i>Kraussina rubra</i>                                | BRAC_Krub   | Transcriptome (Illumina) | SRR2131392                                                                                                                    |
|                      | <i>Lingula anatina</i>                                | BRAC_Lana   | Transcriptome (Illumina) | SRR330440                                                                                                                     |
|                      | <i>Macandrevia cranium</i>                            | BRAC_Mcdv‡  | Transcriptome (Illumina) | SRR1611130                                                                                                                    |
|                      | <i>Novocrania anomala</i>                             | BRAC_Nvcn   | Transcriptome (Illumina) | SRR1611564                                                                                                                    |
|                      | <i>Terebratalia transversa</i>                        | BRAC_Ttvs   | Transcriptome (Illumina) | SRR2005824                                                                                                                    |
| Phoronida [3]        | <i>Phoronis australis</i>                             | PHOR_Paus   | Transcriptome (Illumina) | SRR2018856                                                                                                                    |
|                      | <i>Phoronis psammophila</i>                           | PHOR_Ppsa   | Transcriptome (Illumina) | SRR1611565                                                                                                                    |
|                      | <i>Phoronopsis harmeri</i>                            | PHOR_Phar   | Transcriptome (Illumina) | SRR2131255                                                                                                                    |
| Gastrotricha [5]     | <i>Dactylopodola baltica</i>                          | GAST_Dpdl   | Transcriptome (Illumina) | SRR1273672,SRR1273673,SRR1275388,SRR1275389                                                                                   |
|                      | <i>Diuronotus aspetos</i>                             | GAST_Dnot   | Transcriptome (Illumina) | SRR2131262                                                                                                                    |
|                      | <i>Lepidodermella squamata</i>                        | GAST_Lepi   | Transcriptome (Illumina) | SRR1982110                                                                                                                    |
|                      | <i>Macrodasyus</i> sp.                                | GAST_Mdas   | Transcriptome (Illumina) | SRR1271706,SRR1271707,SRR1271708,SRR1275393                                                                                   |
|                      | <i>Megadasyus</i> sp.                                 | GAST_Megd   | Transcriptome (Illumina) | SRR1273711,SRR1273712,SRR1275394,SRR1275397                                                                                   |
| Platyhelminthes [11] | <i>Bothrioplana semperi</i>                           | PLAT_Bsem   | Transcriptome (Illumina) | SRR1955240, SRR1796356                                                                                                        |
|                      | <i>Echinococcus multilocularis</i>                    | PLAT_Ecmu   | Genome                   | <a href="http://www.genedb.org/Homepage/Emultilocularis">http://www.genedb.org/Homepage/Emultilocularis</a>                   |
|                      | <i>Geocentrophora applanata</i>                       | PLAT_Gapp   | Transcriptome (Illumina) | SRR1955490                                                                                                                    |
|                      | <i>Gnosonesimida</i> sp. IV                           | PLAT_Gnos   | Transcriptome (Illumina) | SRR1976178, SRR1976442                                                                                                        |
|                      | <i>Microstomum</i> cf. <i>lineare</i>                 | PLAT_Mlin   | Transcriptome (Illumina) | SRR1980039                                                                                                                    |
|                      | <i>Monocelis fusca</i>                                | PLAT_Mfus   | Transcriptome (Illumina) | SRR1979673                                                                                                                    |
|                      | <i>Prostheceraeus vittatus</i>                        | PLAT_Pvit   | Transcriptome (Illumina) | SRR2000268                                                                                                                    |

|                     |                                        |                   |                                 |                                                                                                                                                                         |
|---------------------|----------------------------------------|-------------------|---------------------------------|-------------------------------------------------------------------------------------------------------------------------------------------------------------------------|
|                     | Rhynchomesostoma rostratum             | PLAT_Rros         | Transcriptome (Illumina)        | SRR1980143                                                                                                                                                              |
|                     | Schistosoma mansoni                    | PLAT_Sman         | Genome                          | <a href="http://www.genedb.org/Homepage/Smansoni">http://www.genedb.org/Homepage/Smansoni</a>                                                                           |
|                     | Schmidtea mediterranea                 | PLAT_Smed         | Transcriptome (Illumina)        | Alejandro Sánchez Alvarado and Eric Ross, as in 10.7554/eLife.05503                                                                                                     |
|                     | Stenostomum leucops                    | PLAT_Sleu         | Transcriptome (Illumina)        | SRR1910423                                                                                                                                                              |
| Gnathostomulida [3] | Austrognathia sp.                      | GNAT_Augn         | Transcriptome (Illumina)        | SRR1976176                                                                                                                                                              |
|                     | Gnathostomulidae sp. [incorrectly ID'd | GNAT_Gnat†        | Transcriptome (Illumina)        | SRR1271607,SRR1271608,SRR1271613,SRR1275390                                                                                                                             |
|                     | <b>Tenuignathia rikerae</b>            | <b>GNAT_Trik</b>  | <b>Genome</b>                   | <b>PRJNA525844</b>                                                                                                                                                      |
| Micrognathozoa [1]  | Limnognathia maerski                   | MICR_Limn         | Transcriptome (Illumina)        | SRR2131287                                                                                                                                                              |
| Rotifera [5]        | Adineta vaga                           | ROTI_Avag         | Genome                          | <a href="https://metazoa.ensembl.org/Adineta_vaga/Info/Index">https://metazoa.ensembl.org/Adineta_vaga/Info/Index</a>                                                   |
|                     | Brachionus calyciflorus                | ROTI_Bcal         | Transcriptome (Illumina)        | SRR611718,SRR611719,SRR611720,SRR620051,SRR620163                                                                                                                       |
|                     | Echinorhynchus gadi                    | ROTI_Egad†        | Transcriptome (Illumina)        | SRR2131254                                                                                                                                                              |
|                     | Macracanthorhynchus hirudinaceus       | ROTI_Mhir         | Transcriptome (Illumina)        | ERR454503,ERR454504                                                                                                                                                     |
|                     | Rotaria rotatoria                      | ROTI_Rrot         | Transcriptome (Illumina)        | ERR454505                                                                                                                                                               |
| Dicyemida [1]       | <b>Dicyemida sp.</b>                   | <b>DICY_Dicy‡</b> | <b>Transcriptome (Illumina)</b> | <b>PRJNA531422</b>                                                                                                                                                      |
| <b>ECDYSOZOA</b>    |                                        |                   |                                 |                                                                                                                                                                         |
| Priapulida [3]      | <b>Meiopriapulus fijiensis</b>         | <b>PRIA_Meio</b>  | <b>Transcriptome (Illumina)</b> | <b>PRJNA531413</b>                                                                                                                                                      |
|                     | Priapulus caudatus                     | PRIA_Pcau         | Transcriptome (Illumina)        | SRR1611567                                                                                                                                                              |
|                     | Tubiluchus corallicola                 | PRIA_Tubi‡        | Transcriptome (Illumina)        | PRJNA523693                                                                                                                                                             |
| Loricifera [1]      | Armorloricus sp.                       | LORI_Arlc*        | Transcriptome (Illumina)        | SRR2131253                                                                                                                                                              |
| Kinorhyncha [1]     | <b>Echinoderes dujardini</b>           | <b>KINO_Eduj*</b> | <b>Transcriptome (Illumina)</b> | <b>PRJNA523695</b>                                                                                                                                                      |
|                     | Pycnophyes kielensis                   | KINO_Pkie*        | Transcriptome (454)             | SRR1141803                                                                                                                                                              |
| Nematomorpha [1]    | <b>Nectonema munidae</b>               | <b>NEMM_Nect*</b> | <b>Transcriptome (Illumina)</b> | <b>PRJNA523701</b>                                                                                                                                                      |
| Nematoda [8]        | Caenorhabditis elegans                 | NEMA_Celg         | Genome                          | <a href="http://useast.ensembl.org/info/data/ftp/index.html">http://useast.ensembl.org/info/data/ftp/index.html</a>                                                     |
|                     | Haemonchus contortus                   | NEMA_Hcon         | Genome                          | <a href="ftp://ftp.sanger.ac.uk/pub/pathogens/Haemonchus/contortus">ftp://ftp.sanger.ac.uk/pub/pathogens/Haemonchus/contortus</a>                                       |
|                     | Loa loa                                | NEMA_Lloa         | Genome                          | <a href="https://metazoa.ensembl.org/Loa_loa/Info/Index">https://metazoa.ensembl.org/Loa_loa/Info/Index</a>                                                             |
|                     | Panagrellus redivivus                  | NEMA_Pred         | Genome                          | <a href="https://parasite.wormbase.org/Panagrellus_redivivus_prjna186477/Info/Index/">https://parasite.wormbase.org/Panagrellus_redivivus_prjna186477/Info/Index/</a>   |
|                     | Pristionchus pacificus                 | NEMA_Ppac         | Genome                          | <a href="https://metazoa.ensembl.org/Pristionchus_pacificus/Info/Index">https://metazoa.ensembl.org/Pristionchus_pacificus/Info/Index</a>                               |
|                     | Romanomermis culicivorax               | NEMA_Rmcl         | Genome                          | <a href="https://parasite.wormbase.org/Romanomermis_culicivorax_prjeb1358/Info/Index/">https://parasite.wormbase.org/Romanomermis_culicivorax_prjeb1358/Info/Index/</a> |
|                     | Trichinella spiralis                   | NEMA_Tspr         | Genome                          | <a href="http://metazoa.ensembl.org/Trichinella_spiralis/Info/Index">http://metazoa.ensembl.org/Trichinella_spiralis/Info/Index</a>                                     |
|                     | Trichuris muris                        | NEMA_Tmur         | Genome                          | <a href="https://parasite.wormbase.org/Trichuris_muris_prjeb126/Info/Index/">https://parasite.wormbase.org/Trichuris_muris_prjeb126/Info/Index/</a>                     |
| Tardigrada [2]      | Hypsibius dujardini                    | TARD_Hduj         | Genome                          | <a href="http://ensembl.tardigrades.org/Hypsibius_dujardini_nhd231/Info/Index">http://ensembl.tardigrades.org/Hypsibius_dujardini_nhd231/Info/Index</a>                 |
|                     | Milnesium tardigradum                  | TARD_Mtar         | Transcriptome (Hybrid Illu      | Provided by Chong Wang, as in Laumer et al 2015                                                                                                                         |
| Onychophora [4]     | <b>Ooperipatellus sp.</b>              | <b>ONYC_Oope</b>  | <b>Transcriptome</b>            | <b>PRJNA523702</b>                                                                                                                                                      |
|                     | <b>Peripatoides sp.</b>                | <b>ONYC_Peri</b>  | <b>Transcriptome</b>            | <b>PRJNA523703</b>                                                                                                                                                      |
|                     | Peripatopsis overbergensis             | ONYC_Pcap         | Transcriptome                   | SRR1145776                                                                                                                                                              |
|                     | <b>Peripatus sp.</b>                   | <b>ONYC_Pept</b>  | <b>Transcriptome</b>            | <b>PRJNA523712</b>                                                                                                                                                      |
| Arthropoda [14]     | <b>Anoplodactylus insignis</b>         | <b>ARTH_Ains</b>  | <b>Transcriptome (Illumina)</b> | <b>SRR5237777</b>                                                                                                                                                       |
|                     | Apis mellifera                         | ARTH_Amel         | Genome                          | <a href="https://metazoa.ensembl.org/Apis_mellifera/Info/Index">https://metazoa.ensembl.org/Apis_mellifera/Info/Index</a>                                               |
|                     | Calanus finmarchicus                   | ARTH_Cfin         | Transcriptome (Illumina)        | SRR6065686                                                                                                                                                              |
|                     | Daphnia pulex                          | ARTH_Dpul         | Genome                          | <a href="https://metazoa.ensembl.org/Daphnia_pulex/Info/Index">https://metazoa.ensembl.org/Daphnia_pulex/Info/Index</a>                                                 |
|                     | Drosophila melanogaster                | ARTH_Dmel         | Genome                          | <a href="https://www.ensembl.org/Drosophila_melanogaster/Info/Index">https://www.ensembl.org/Drosophila_melanogaster/Info/Index</a>                                     |
|                     | Eudigraphis taiwaniensis               | ARTH_Etai         | Transcriptome (Illumina)        | SRR3458640                                                                                                                                                              |
|                     | Fenneropenaeus merguensis              | ARTH_Fmer         | Transcriptome (Illumina)        | SRR1756093                                                                                                                                                              |
|                     | Folsomia candida                       | ARTH_Fcan         | Transcriptome (Illumina)        | SRX321913                                                                                                                                                               |
|                     | Glomeris marginata                     | ARTH_Gmar         | Transcriptome (Illumina)        | SRR3233211                                                                                                                                                              |
|                     | Ixodes scapularis                      | ARTH_Isca         | Genome                          | <a href="http://metazoa.ensembl.org/Ixodes_scapularis/Info/Index">http://metazoa.ensembl.org/Ixodes_scapularis/Info/Index</a>                                           |
|                     | Limulus polyphemus                     | ARTH_Limu         | Genome                          | PRJNA187356                                                                                                                                                             |

|                                |                          |                         |                          |                                                                                                                                           |
|--------------------------------|--------------------------|-------------------------|--------------------------|-------------------------------------------------------------------------------------------------------------------------------------------|
|                                | Scutigera sp.            | ARTH_Scuti†             | Transcriptome (Illumina) | SRR3458649                                                                                                                                |
|                                | Stegodyphus mimosarium   | ARTH_Smim               | Genome                   | <a href="https://metazoa.ensembl.org/Stegodyphus_mimosarium/Info/Index">https://metazoa.ensembl.org/Stegodyphus_mimosarium/Info/Index</a> |
|                                | Strigamia maritima       | ARTH_Smar               | Genome                   | <a href="https://metazoa.ensembl.org/Strigamia_maritima/Info/Index">https://metazoa.ensembl.org/Strigamia_maritima/Info/Index</a>         |
| <b>OUTGROUPS</b>               |                          |                         |                          |                                                                                                                                           |
| Choanoflagellata [2]           | Monosiga brevicollis     | OUTC_Mbre               | Genome                   | GCA_000002865.1 V1.0                                                                                                                      |
|                                | Salpingoeca rosetta      | OUTC_Sros               | Genome                   | ACSY01                                                                                                                                    |
| Filastera [2]                  | Capsaspora owczarzaki    | OUTI_Cowc†              | Genome                   | GCA_000151315.2                                                                                                                           |
|                                | Ministeria vibrans       | OUTI_Mvar†              | Transcriptome (Illumina) | SRX096925                                                                                                                                 |
| Cristidiscoidea [1]            | Fonticula alba           | OUTI_Falb†              | Genome                   | GCA_000388065.2                                                                                                                           |
| Ichthyosporea [2]              | Amoebidium parasiticum   | OUTI_Apar†              | Transcriptome (Illumina) | PRJNA189477                                                                                                                               |
|                                | Sphaeroforma artica      | OUTI_Sart†              | Genome                   | GCA_001186125.1                                                                                                                           |
| Apusomonadida [1]              | Thecamonas trahens       | OUTI_Ttra†              | Genome                   | GCF_000142905.1                                                                                                                           |
| Ascomycota (Fungi) [1]         | Fusarium oxysporum       | OUTF_Foxy†              | Genome                   | AGNE01                                                                                                                                    |
| Glomeromycota (Fungi) [2]      | Rhizophagus irregularis  | OUTF_Rirr/OUTF_Rsol [re | Genome                   | JEMT01                                                                                                                                    |
|                                | Spizellomyces punctatus  | OUTF_Spun†              | Genome                   | GCF_000182565.1                                                                                                                           |
| Blastocladiomycota (Fungi) [1] | Allomyces macrogynus     | OUTF_Amac†              | Genome                   | GCA_000151295.1                                                                                                                           |
| Cryptomycota (Fungi) [1]       | Rozella allomycis        | OUTF_Rall†              | Genome                   | PRJNA81749                                                                                                                                |
| Zygomycota (Fungi) [1]         | Mortierella verticillata | OUTF_Mver†              | Genome                   | GCA_000739165.1                                                                                                                           |
